# Supplementary material
Source: Royal Society of Chemistry journal article supplement (doi:10.1039/d6ja00088f)
Supplement: d6ja00088f1.pdf [file d6ja00088f1.pdf]

Model1: Dense-fill or Frequency-divider model

Model4: Raster-spot model

Scanned area: 5 $\mu$ m

divider:10

layers:2

Model 1

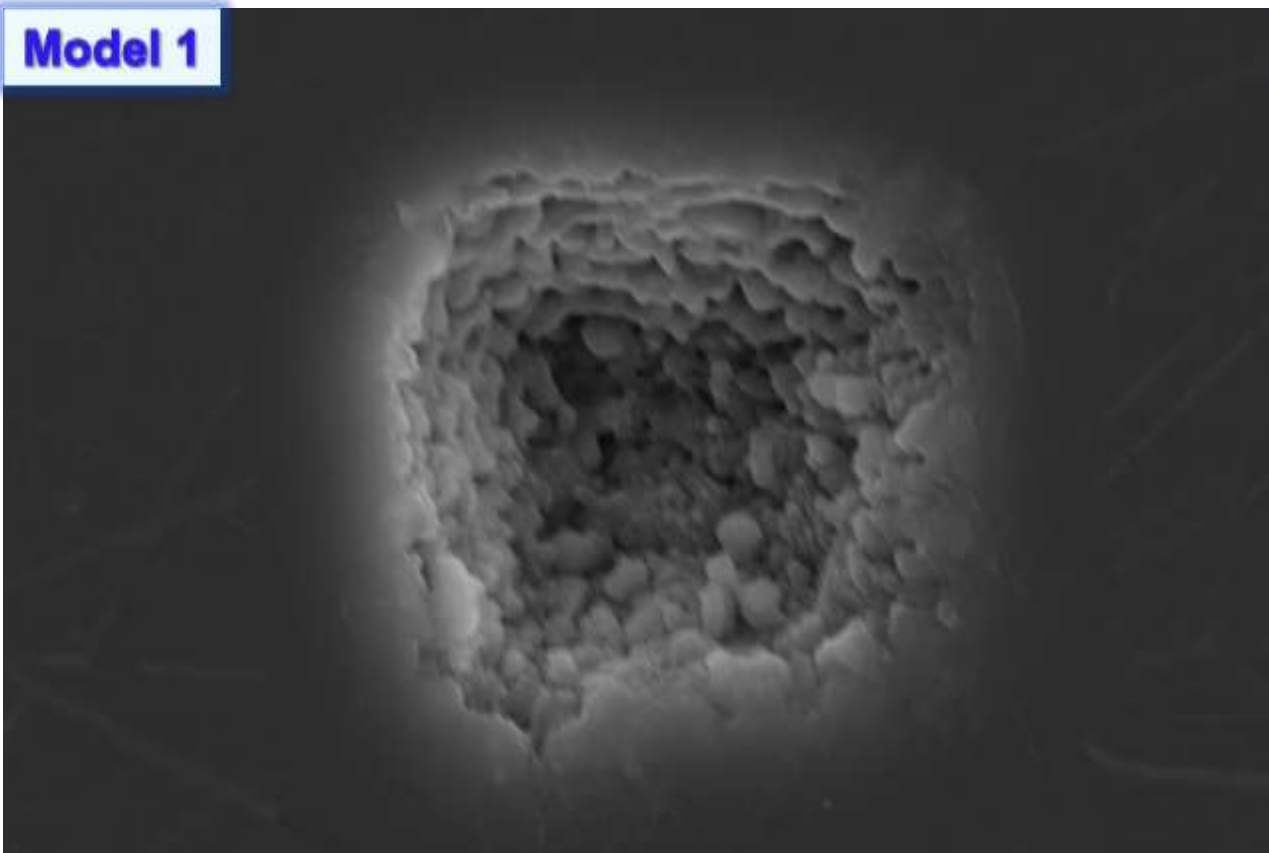

Model 4

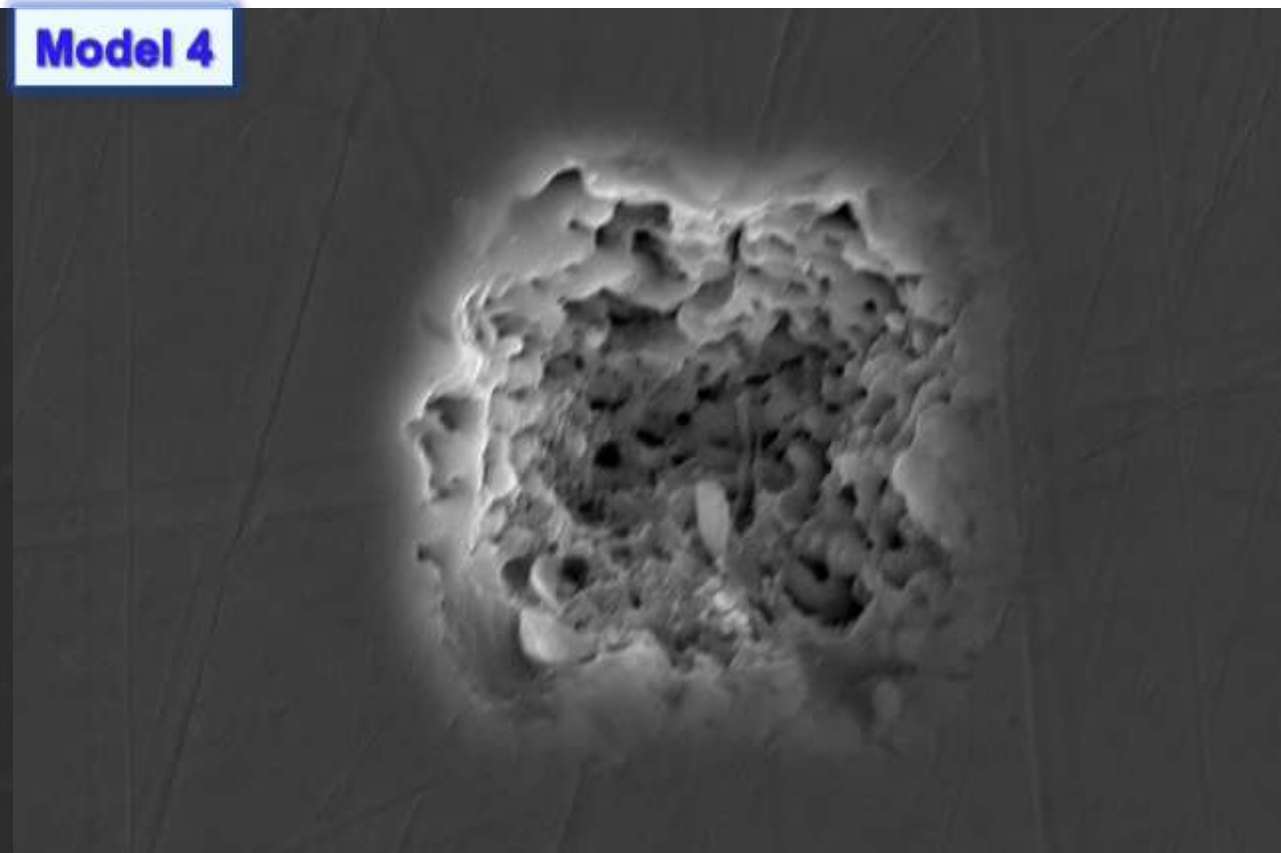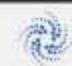

Det LD-SE  
WD 23.66mm

HV 15kV  
HFW 17.08 $\mu$ m

Gear 高分辨  
Res 3072x2048

MAG x 7 500  
Dwell 4 $\mu$ s

SEM4000X

2 $\mu$ m

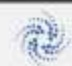

Det LD-SE  
WD 9.09mm

HV 10kV  
HFW 17.08 $\mu$ m

Gear 高分辨  
Res 3072x2048

MAG x 7 500  
Dwell 4 $\mu$ s

SEM4000X

2 $\mu$ m

Energy: 50 $\times$ 50

MarkSpeed:10 W

JumpSpeed:100 W

LineInterval:1

n:3

MarkInterval:1000

Scanned area: 5 $\mu$ m

divider:10

layers:20

Model 1

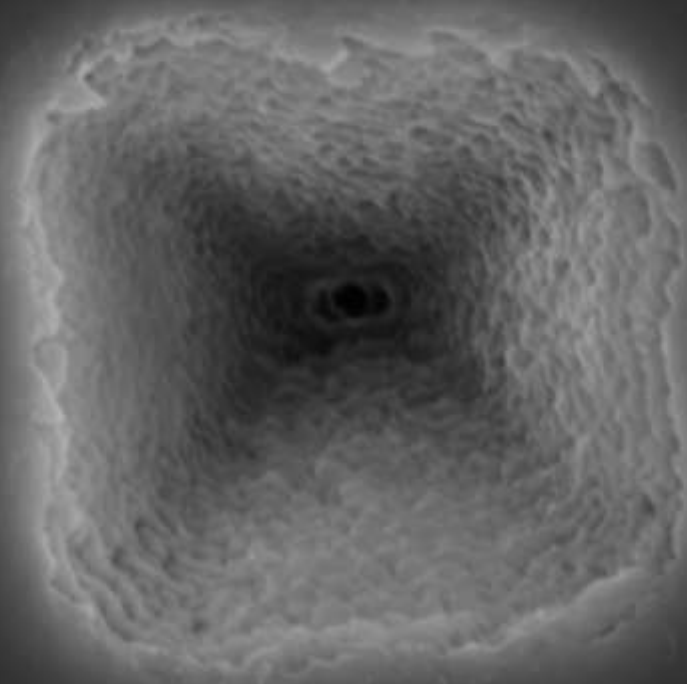

Model 4

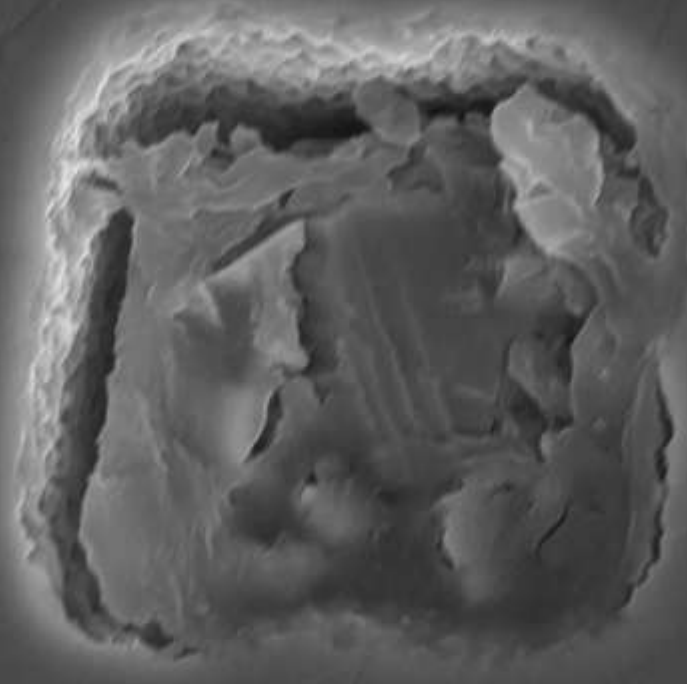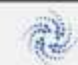

Det LD-SE  
WD 23.68mm  
HV 15kV  
HFW 17.08 $\mu$ m

Gear 高分辨  
Res 3072x2048

MAG x 7 500  
Dwell 4 $\mu$ s

SEM4000X

2 $\mu$ m

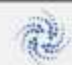

Det LD-SE  
WD 9.06mm  
HV 10kV  
HFW 17.08 $\mu$ m

Gear 高分辨  
Res 3072x2048

MAG x 7 500  
Dwell 4 $\mu$ s

SEM4000X

2 $\mu$ m

Energy: 50 $\times$ 50

MarkSpeed:10 W

JumpSpeed:100 W

LineInterval:1

n:3

MarkInterval:1000

Scanned area: 5 $\mu$ m

divider:10

layers:40

Model 1

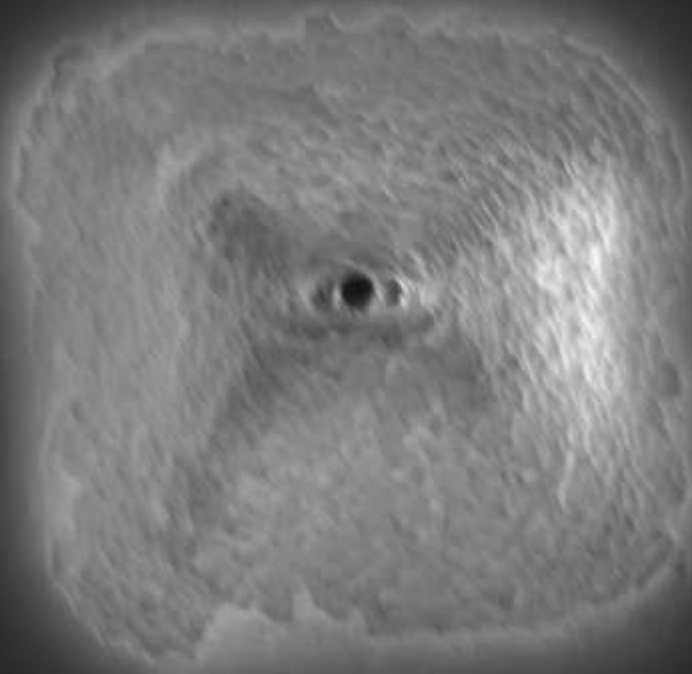

Model 4

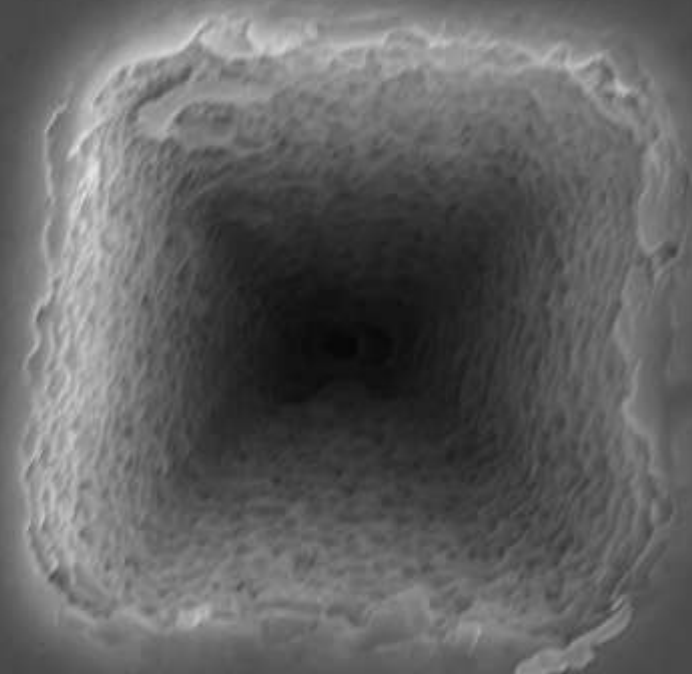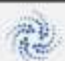

Det LD-SE  
WD 23.64mm

HV 15kV  
HFW 17.08 $\mu$ m

Gear 高分辨  
Res 3072x2048

MAG x 7 500  
Dwell 4 $\mu$ s

SEM4000X  
|-----2 $\mu$ m-----|

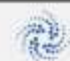

Det LD-SE  
WD 9.09mm

HV 10kV  
HFW 17.08 $\mu$ m

Gear 高分辨  
Res 3072x2048

MAG x 7 500  
Dwell 4 $\mu$ s

SEM4000X  
|-----2 $\mu$ m-----|

Energy: 50 $\times$ 50

MarkSpeed:10 W

JumpSpeed:100 W

LineInterval:1

n:3

MarkInterval:1000

Scanned area: 5 $\mu$ m

divider:50

layers:2

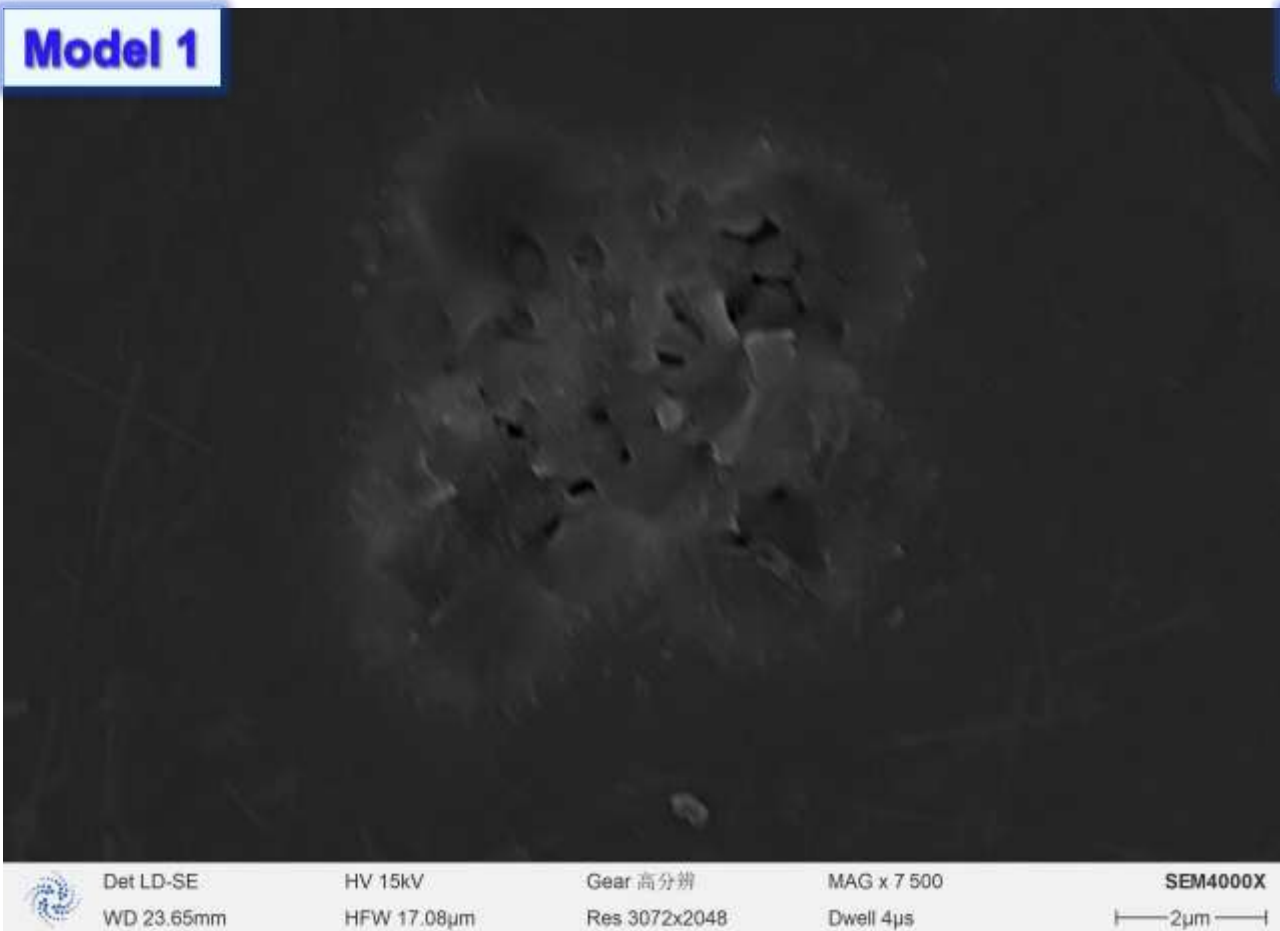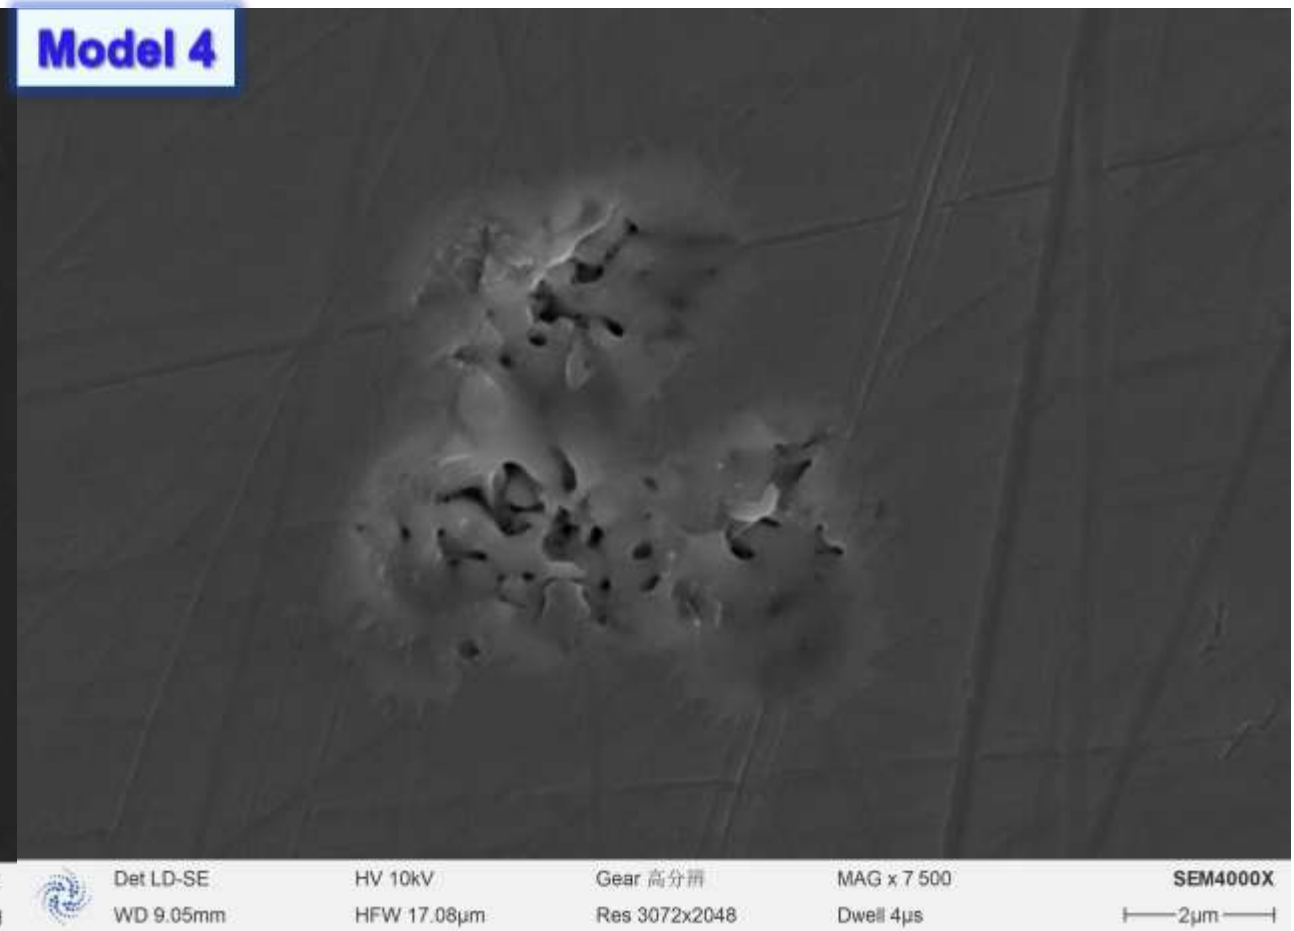

Energy: 50 $\times$ 50

MarkSpeed:10 W

JumpSpeed:100 W

LineInterval:1

n:3

MarkInterval:1000

Scanned area: 5 $\mu$ m

divider:50

layers:20

Model 1

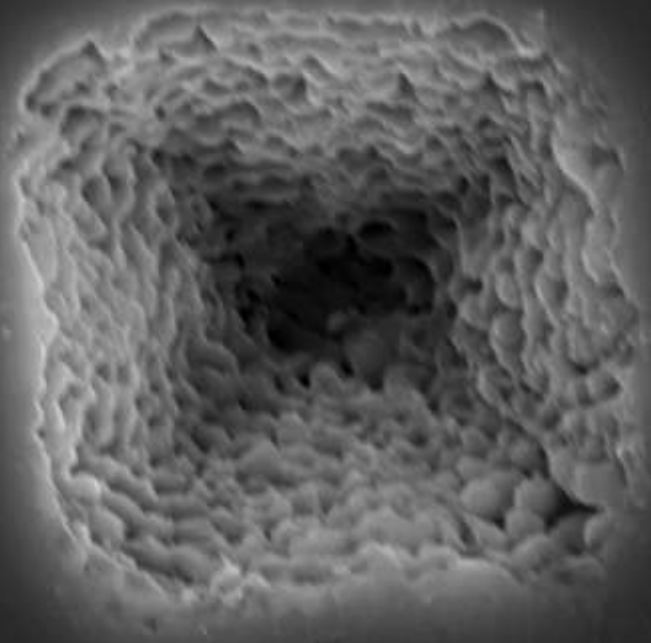

Model 4

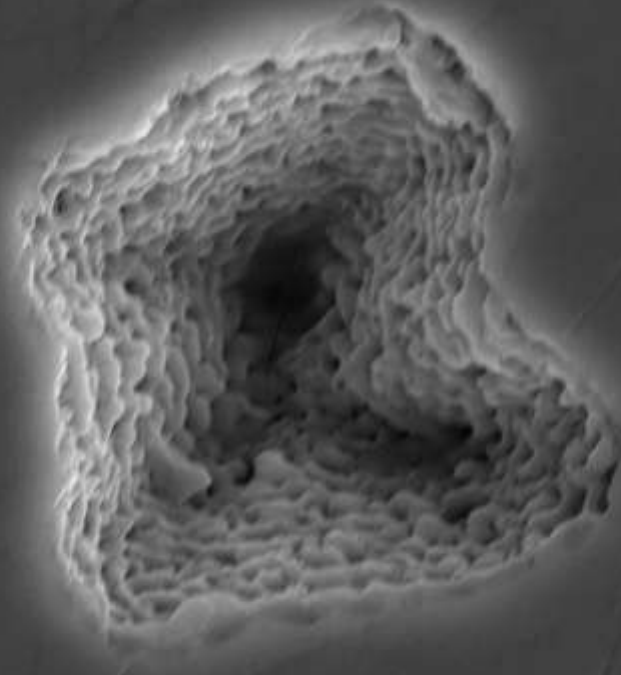

Det LD-SE HV 15kV Gear 高分辨 MAG x 7 500 SEM4000X  
WD 23.65mm HFW 17.08 $\mu$ m Res 3072x2048 Dwell 4 $\mu$ s  
2 $\mu$ m

Det LD-SE HV 10kV Gear 高分辨 MAG x 7 500 SEM4000X  
WD 9.08mm HFW 17.08 $\mu$ m Res 3072x2048 Dwell 4 $\mu$ s  
2 $\mu$ m

Energy: 50 $\times$ 50

MarkSpeed:10 W

JumpSpeed:100 W

LineInterval:1

n:3

MarkInterval:1000

Scanned area: 5 $\mu$ m

divider:50

layers:40

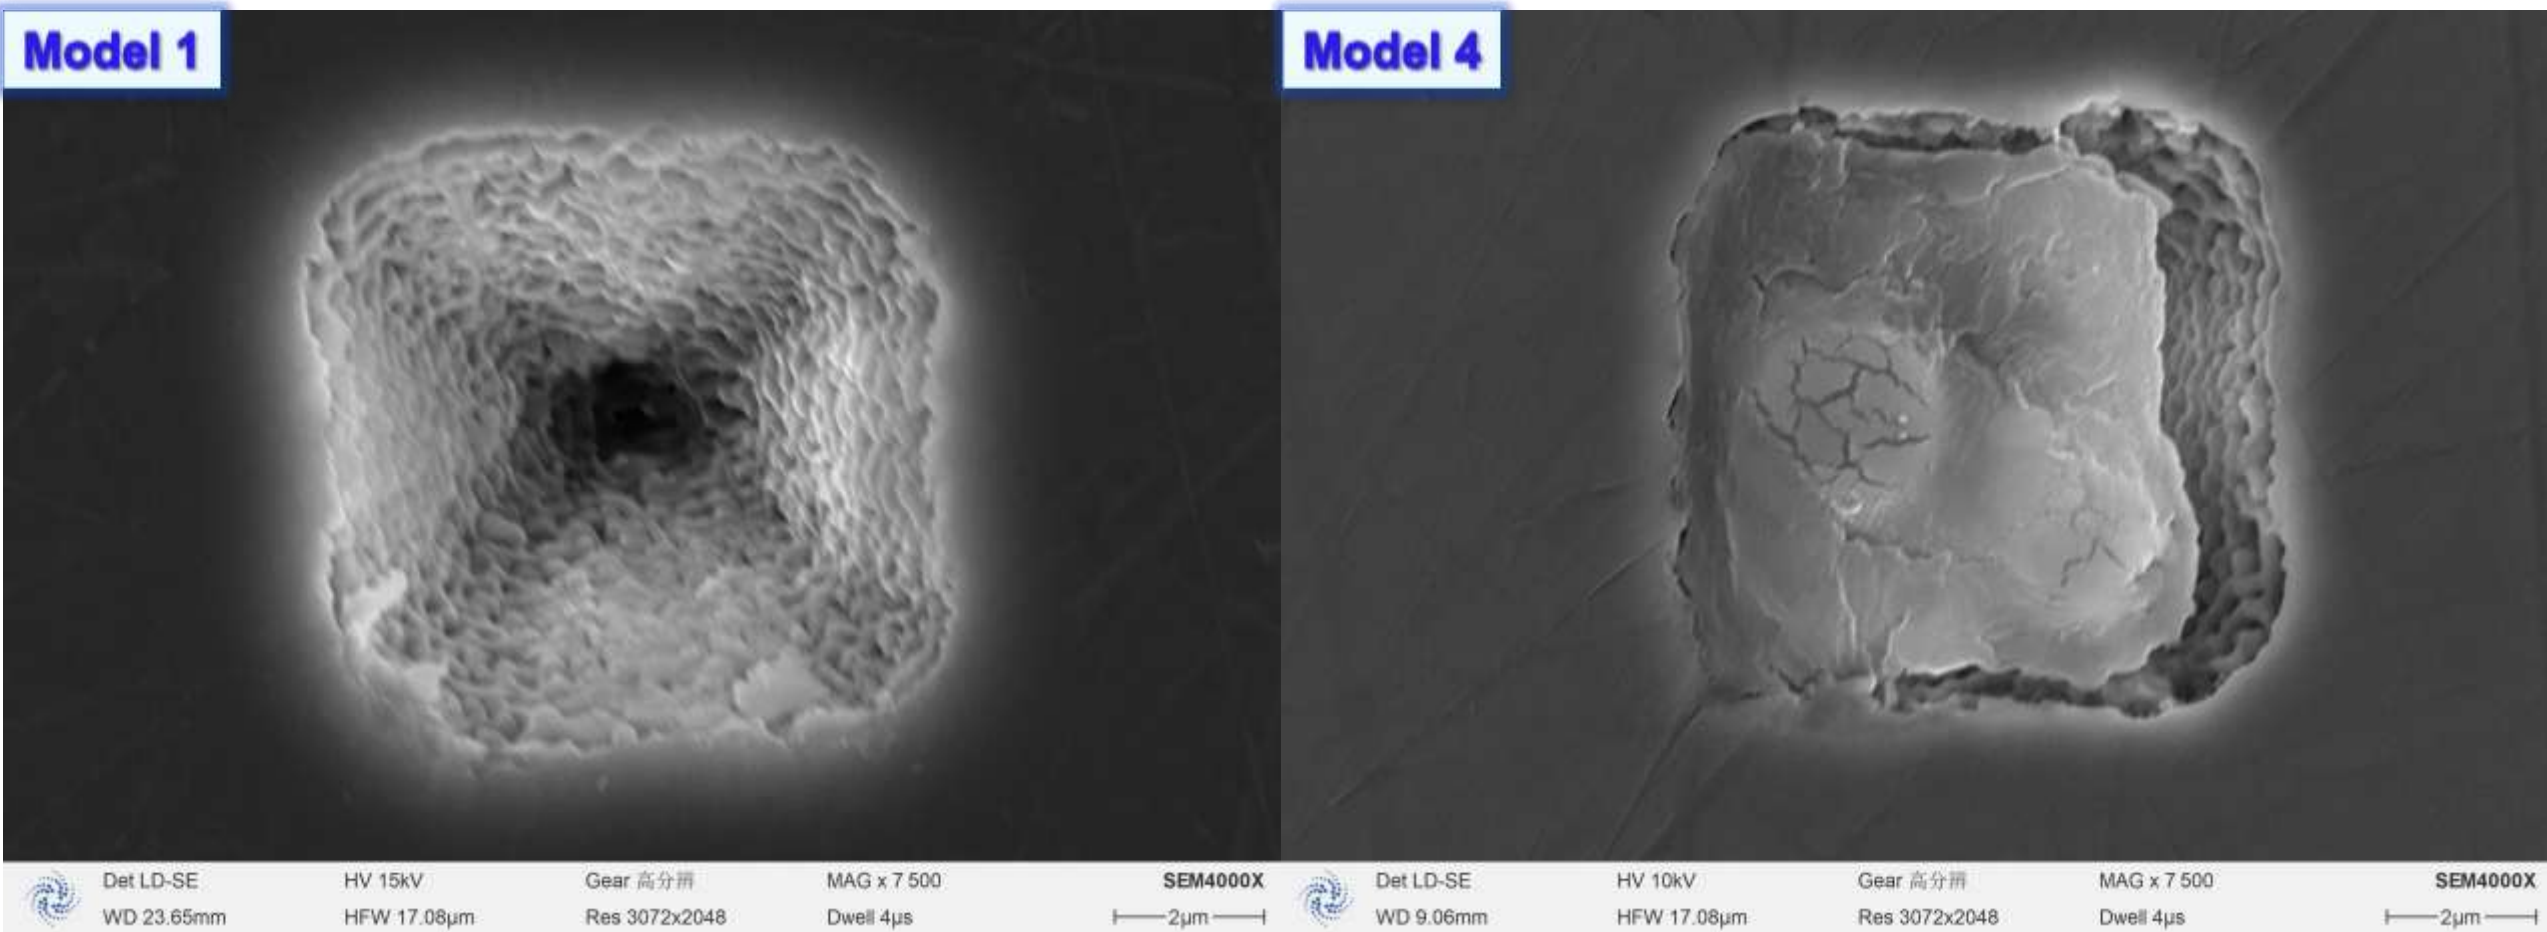

Energy: 50 $\times$ 50

MarkSpeed:10 W

JumpSpeed:100 W

LineInterval:1

n:3

MarkInterval:1000

Scanned area: 5 $\mu$ m

divider:150

layers:2

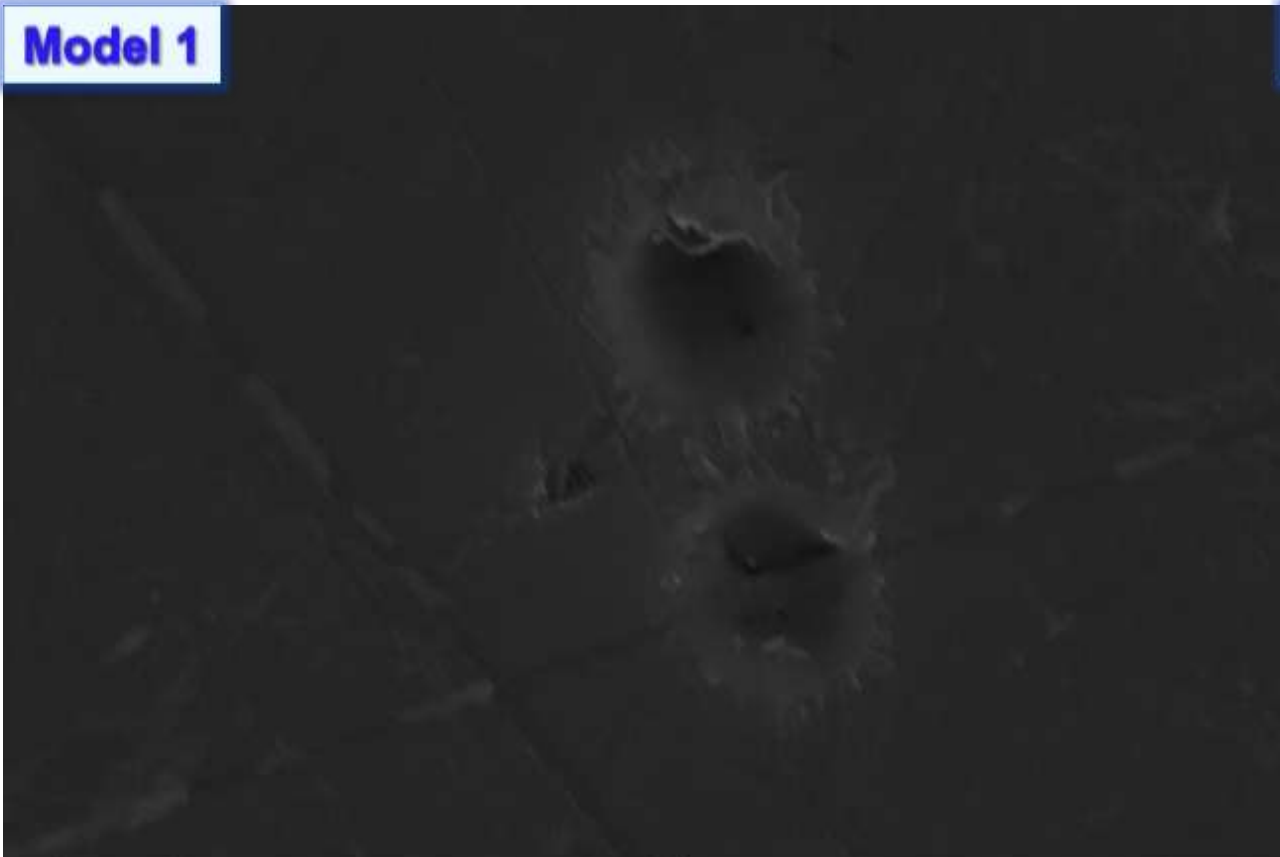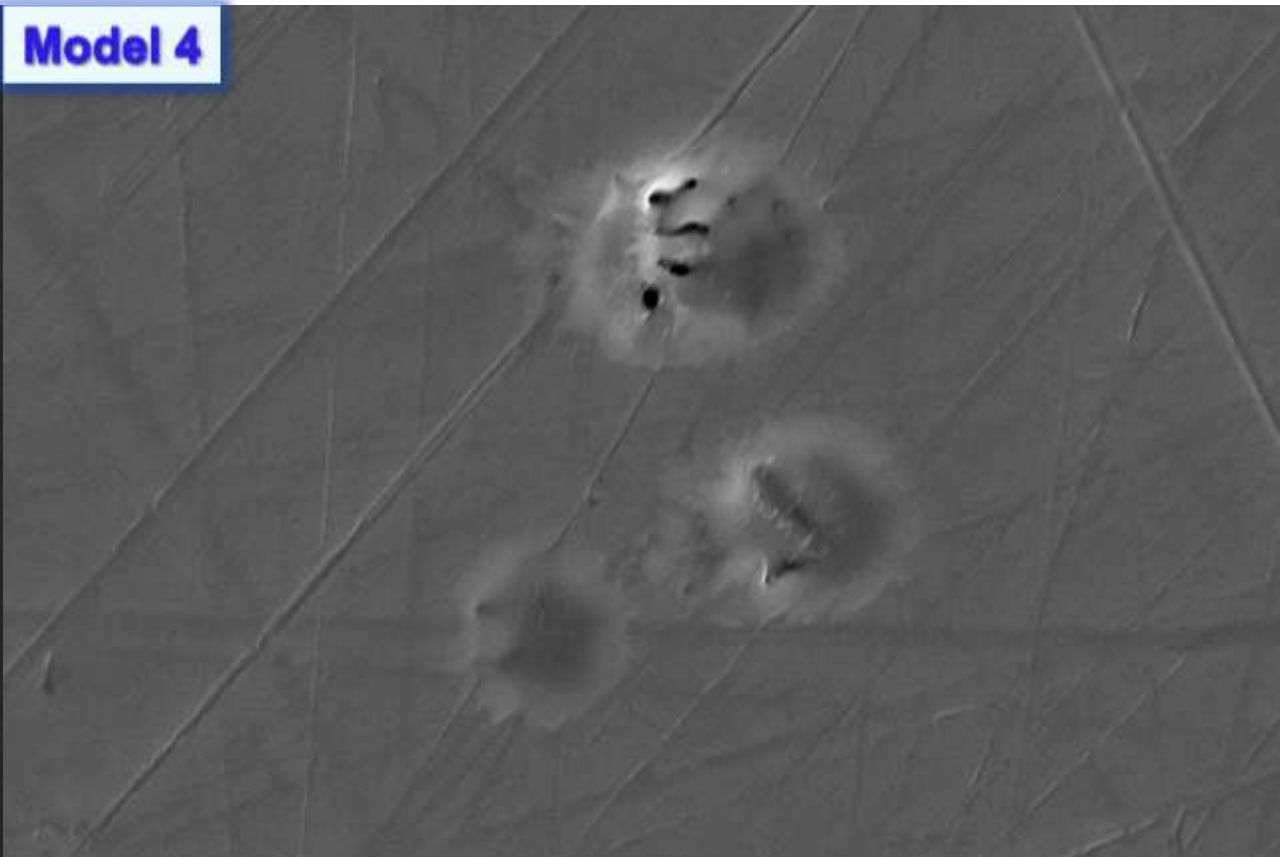

Det LD-SE HV 15kV Gear 高分辨 MAG x 7 500 SEM4000X  
WD 23.65mm HFW 17.08 $\mu$ m Res 3072x2048 Dwell 4 $\mu$ s | 2 $\mu$ m

Det LD-SE HV 10kV Gear 高分辨 MAG x 7 500 SEM4000X  
WD 9.07mm HFW 17.08 $\mu$ m Res 3072x2048 Dwell 4 $\mu$ s | 2 $\mu$ m

Energy: 50 $\times$ 50

MarkSpeed:10 W

JumpSpeed:100 W

LineInterval:1

n:3

MarkInterval:1000

Scanned area: 5 $\mu$ m

divider:150

layers:20

Model 1

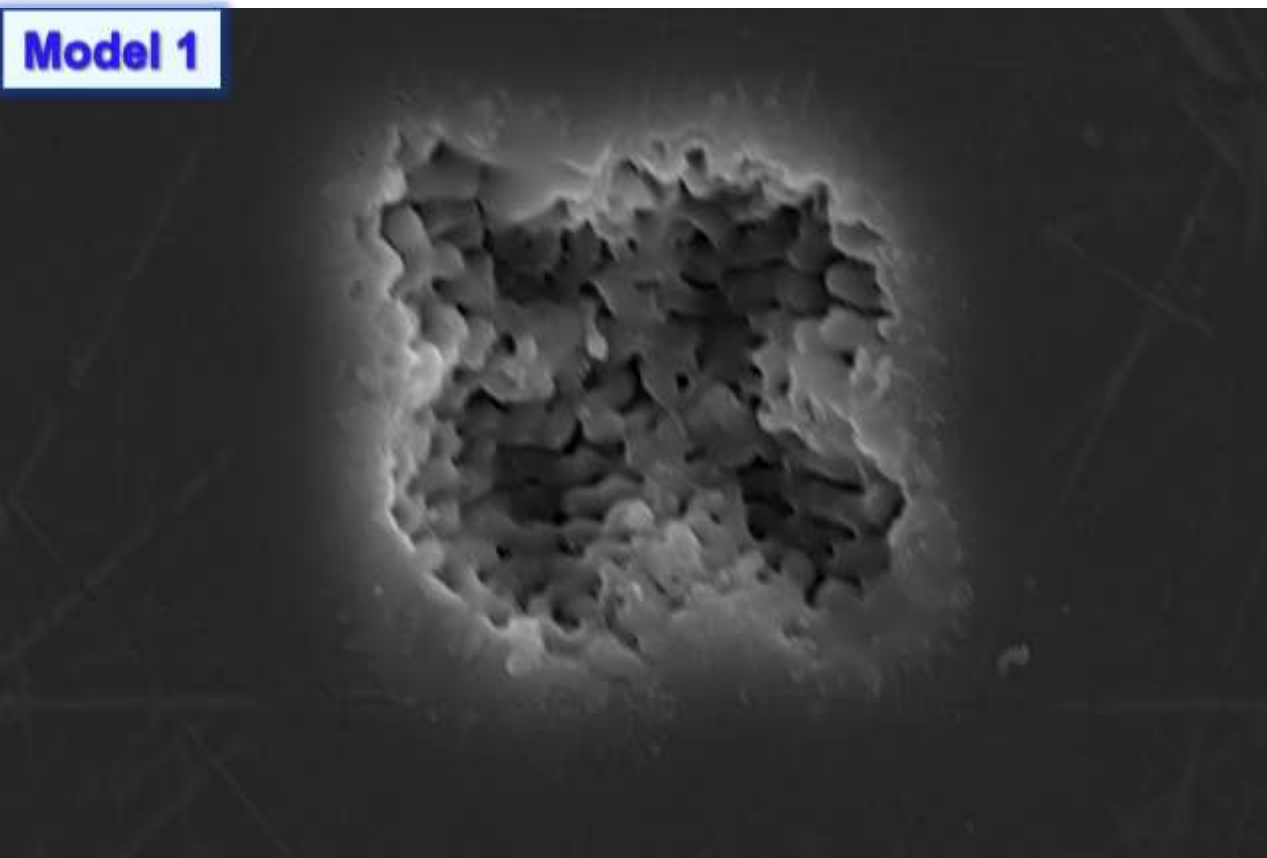

Model 4

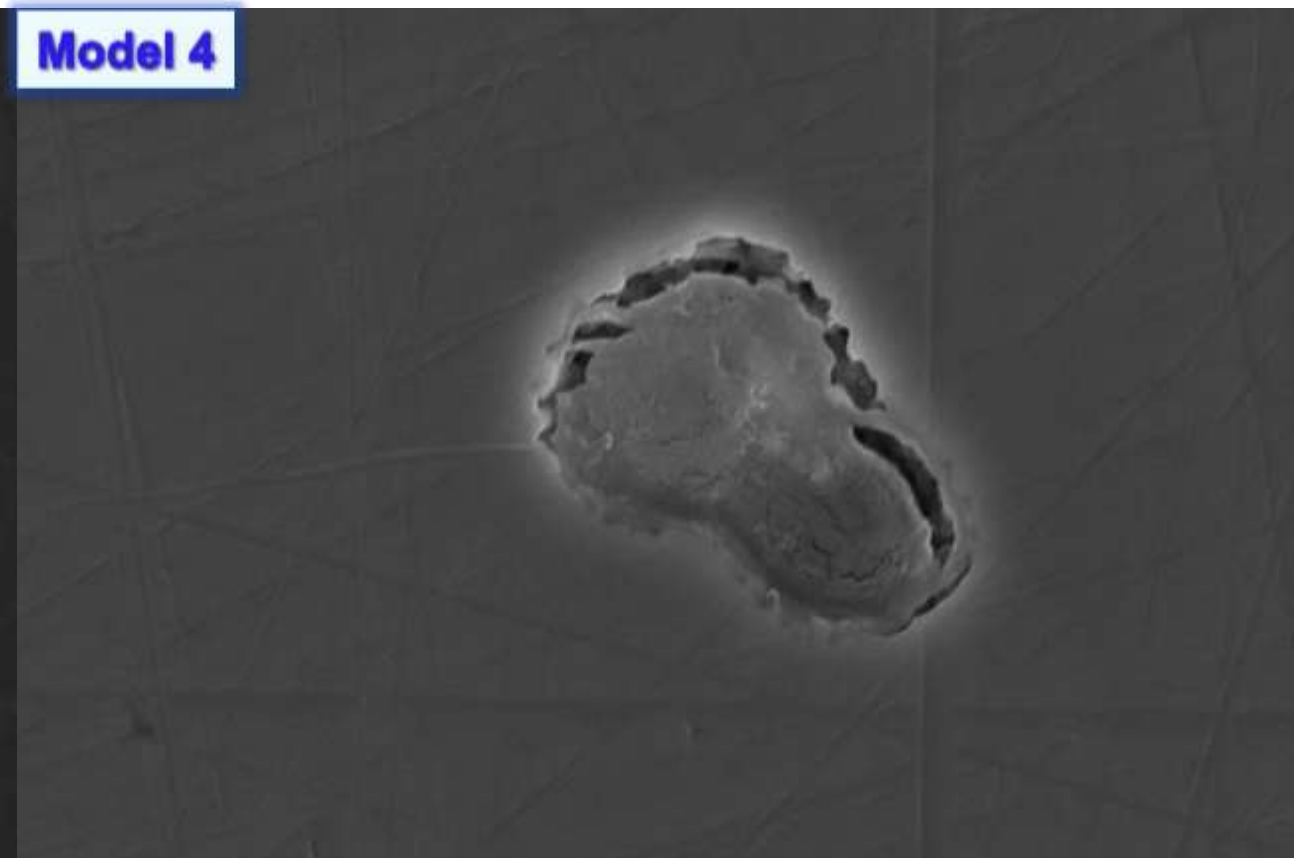

Det LD-SE HV 15kV Gear 高分辨 MAG x 7 500 SEM4000X  
WD 23.65mm HFW 17.08 $\mu$ m Res 3072x2048 Dwell 4 $\mu$ s | 2 $\mu$ m

Det LD-SE HV 10kV Gear 高分辨 MAG x 7 500 SEM4000X  
WD 9.05mm HFW 17.08 $\mu$ m Res 3072x2048 Dwell 4 $\mu$ s | 2 $\mu$ m

Energy: 50 $\times$ 50

MarkSpeed:10 W

JumpSpeed:100 W

LineInterval:1

n:3

MarkInterval:1000

Scanned area: 5 $\mu$ m

divider:150

layers:40

Model 1

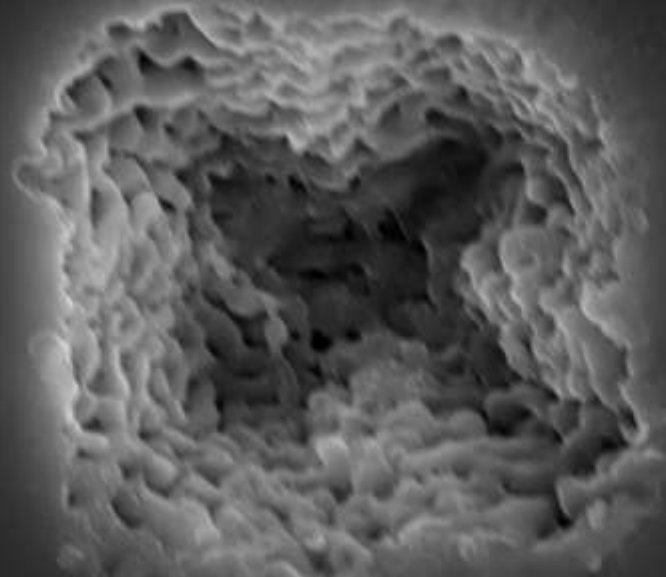

Model 4

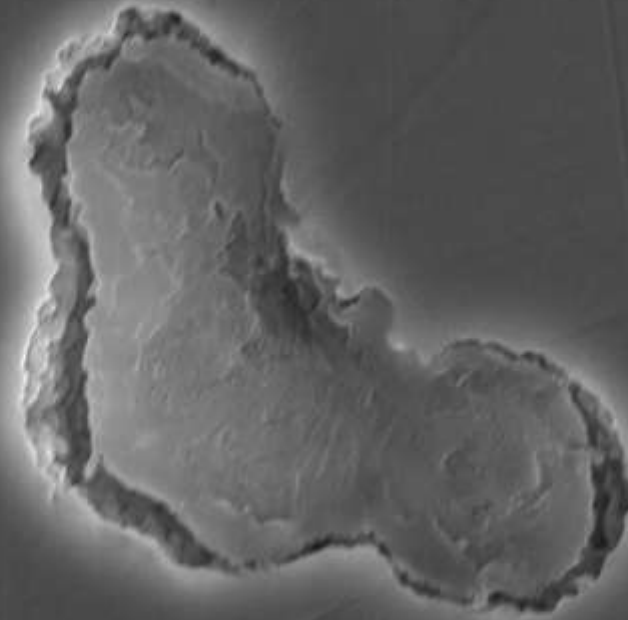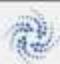

Det LD-SE  
WD 23.65mm

HV 15kV  
HFW 17.08 $\mu$ m

Gear 高分辨  
Res 3072x2048

MAG x 7 500  
Dwell 4 $\mu$ s

SEM4000X  
|-----2 $\mu$ m-----|

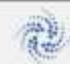

Det LD-SE  
WD 9.07mm

HV 10kV  
HFW 17.08 $\mu$ m

Gear 高分辨  
Res 3072x2048

MAG x 7 500  
Dwell 4 $\mu$ s

SEM4000X  
|-----2 $\mu$ m-----|

Energy: 50 $\times$ 50

MarkSpeed:10 W

JumpSpeed:100 W

LineInterval:1

n:3

MarkInterval:1000

Scanned area: 15 $\mu$ m

divider:10

layers:2

Model 1

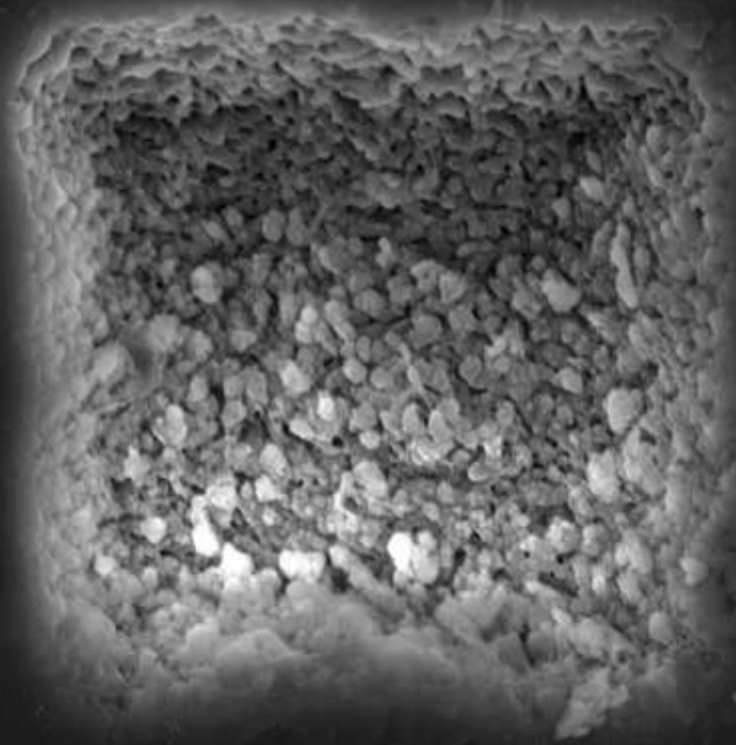

Model 4

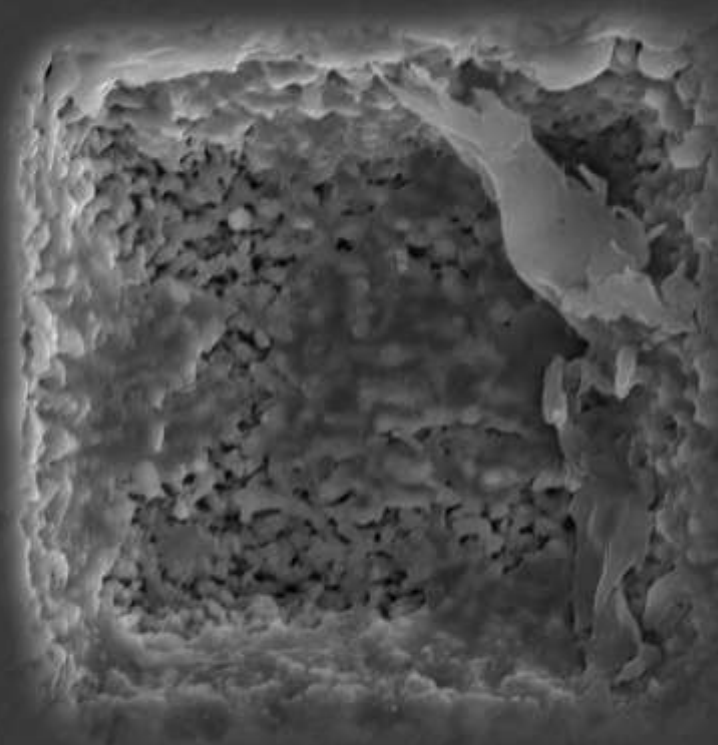

Det LD-SE HV 15kV Gear 高分辨 MAG x 4 000  
WD 23.67mm HFW 32.03 $\mu$ m Res 3072x2048 Dwell 4 $\mu$ s

SEM4000X  
┌─2 $\mu$ m─┐

Det LD-SE HV 10kV Gear 高分辨 MAG x 4 000  
WD 9.07mm HFW 32.03 $\mu$ m Res 3072x2048 Dwell 4 $\mu$ s

SEM4000X  
┌─2 $\mu$ m─┐

Energy: 50 $\times$ 50

MarkSpeed:10 W

JumpSpeed:100 W

LineInterval:1

n:8

MarkInterval:1000

Scanned area: 15μm

divider:10

layers:20

Model 1

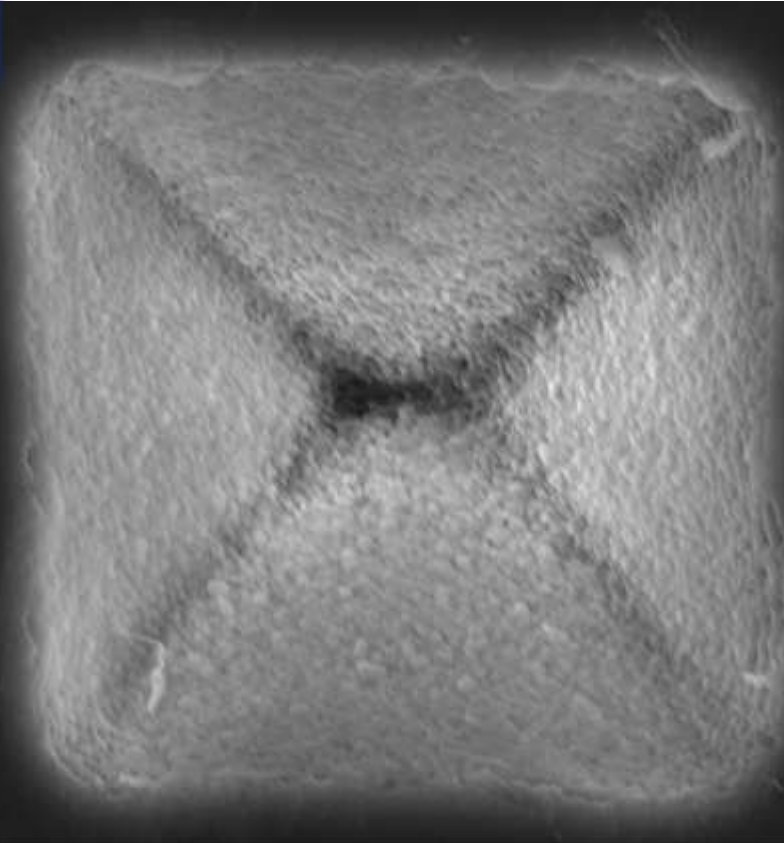

Model 4

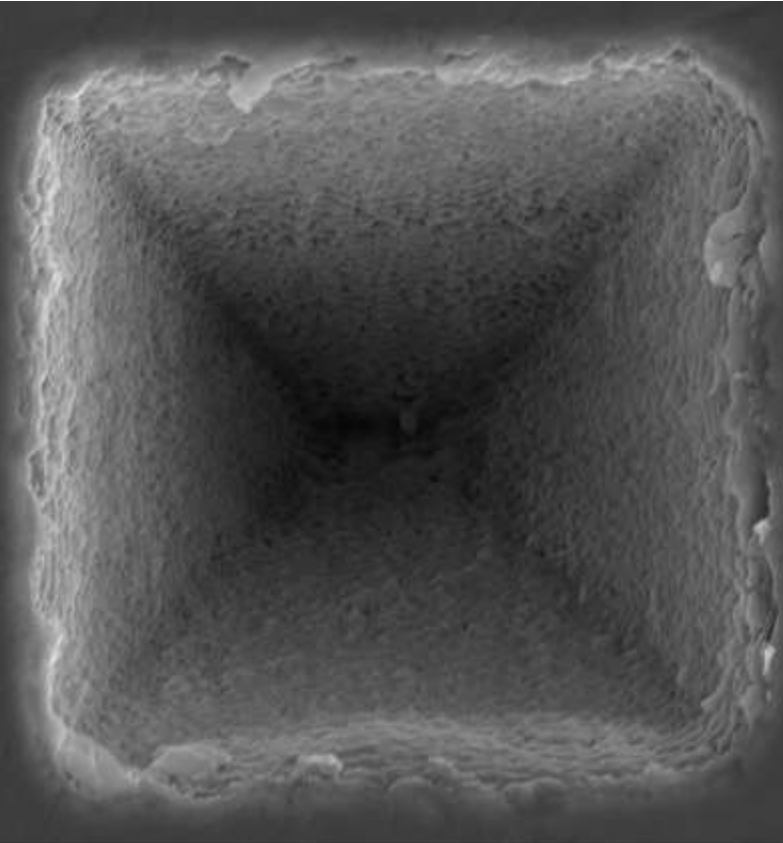

Det LD-SE HV 15kV Gear 高分辨 MAG x 4 000  
WD 23.64mm HFW 32.03μm Res 3072x2048 Dwell 4μs

SEM4000X  
┌─2μm─┐

Det LD-SE HV 10kV Gear 高分辨 MAG x 4 000  
WD 9.08mm HFW 32.03μm Res 3072x2048 Dwell 4μs

SEM4000X  
┌─2μm─┐

Energy: 50×50

MarkSpeed:10 W

JumpSpeed:100 W

LineInterval:1

n:8

MarkInterval:1000

Scanned area: 15 $\mu$ m

divider:10

layers:40

Model 1

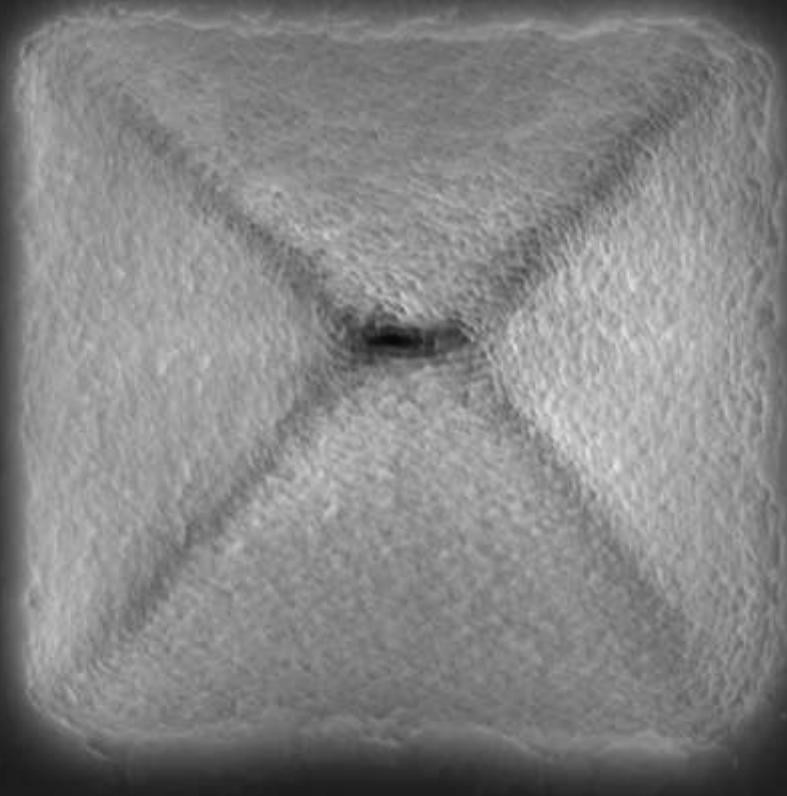

Model 4

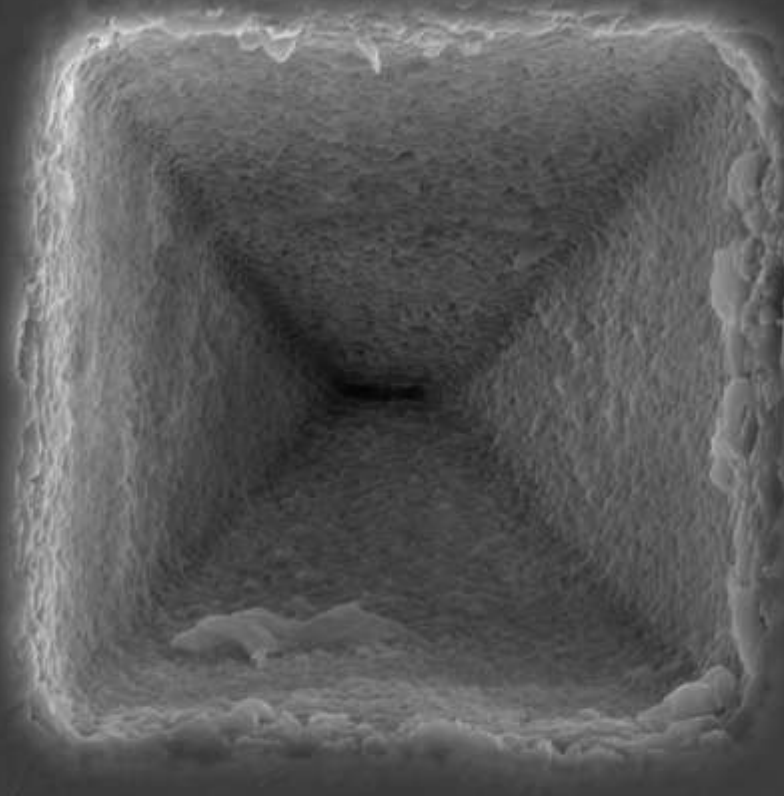

Det LD-SE HV 15kV Gear 高分辨 MAG x 4 000  
WD 23.67mm HFW 32.03 $\mu$ m Res 3072x2048 Dwell 4 $\mu$ s

SEM4000X  
┌─2 $\mu$ m─┐

Det LD-SE HV 10kV Gear 高分辨 MAG x 4 000 SEM4000X  
WD 9.06mm HFW 32.03 $\mu$ m Res 3072x2048 Dwell 4 $\mu$ s ┌─2 $\mu$ m─┐

Energy: 50 $\times$ 50

MarkSpeed:10 W

JumpSpeed:100 W

LineInterval:1

n:8

MarkInterval:1000

Scanned area: 15 $\mu$ m

divider:50

layers:2

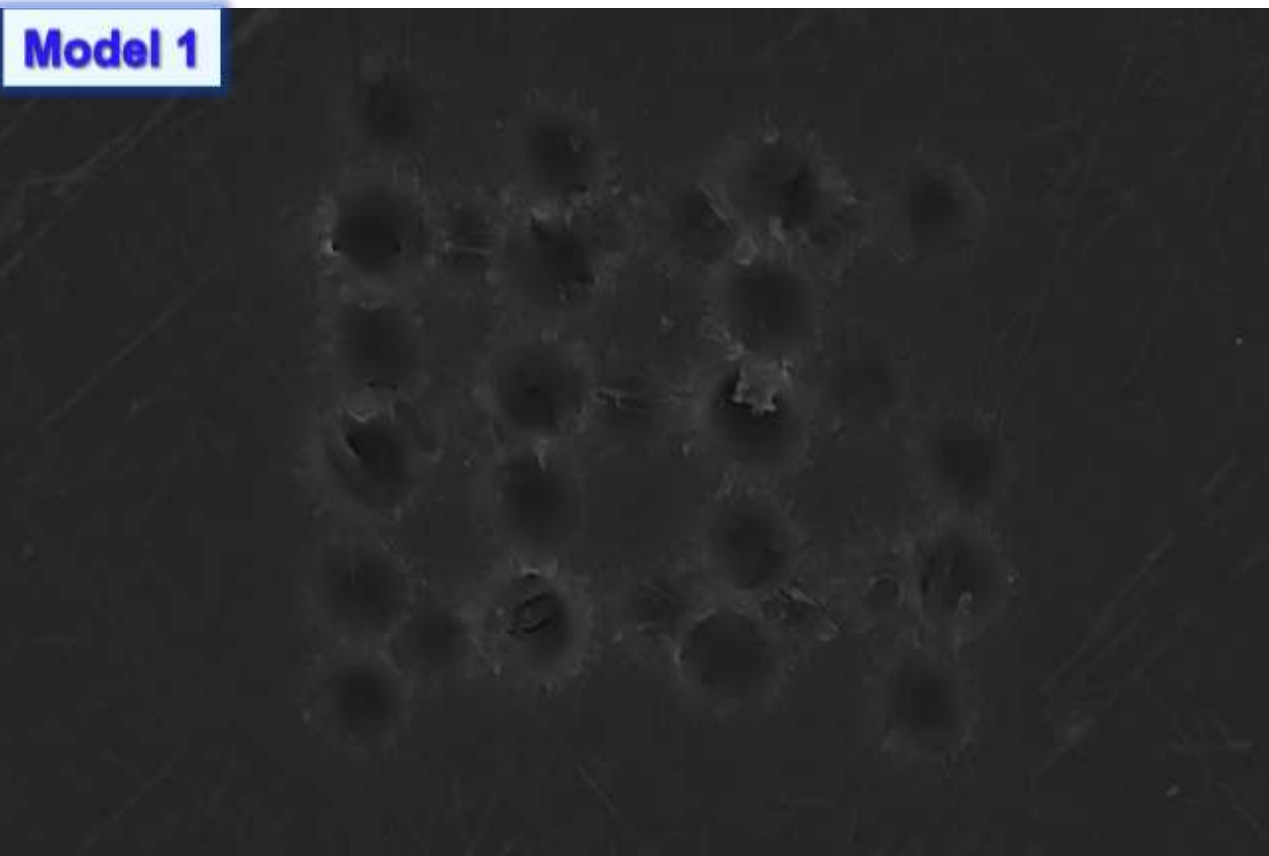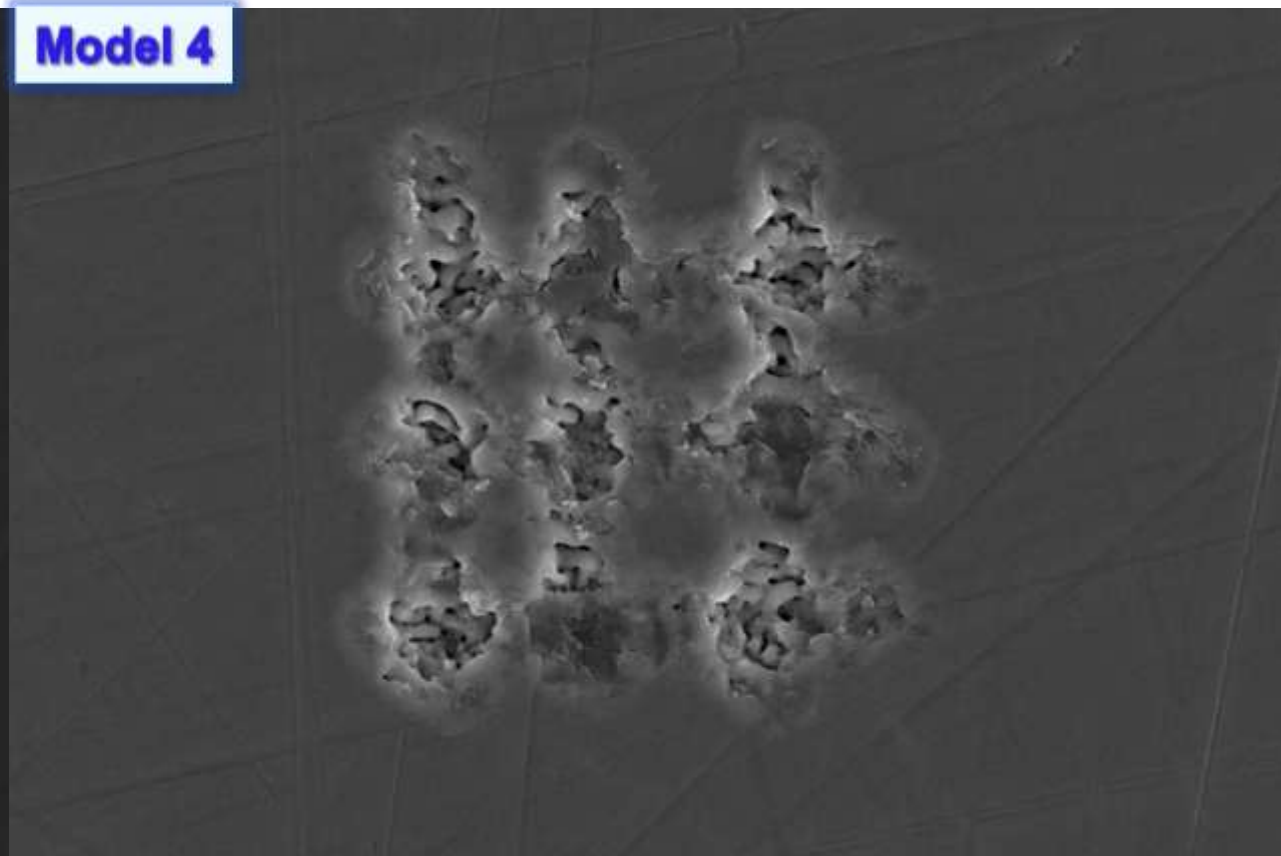

Det LD-SE HV 15kV Gear 高分辨 MAG x 4 000 SEM4000X  
WD 23.65mm HFW 32.03 $\mu$ m Res 3072x2048 Dwell 4 $\mu$ s  $\leftarrow$ 2 $\mu$ m $\rightarrow$

Det LD-SE HV 10kV Gear 高分辨 MAG x 3 500 SEM4000X  
WD 14.04mm HFW 36.61 $\mu$ m Res 3072x2048 Dwell 4 $\mu$ s  $\leftarrow$ 5 $\mu$ m $\rightarrow$

Energy: 50 $\times$ 50

MarkSpeed:10 W

JumpSpeed:100 W

LineInterval:1

n:8

MarkInterval:1000

Scanned area: 15 $\mu$ m

divider:50

layers:20

Model 1

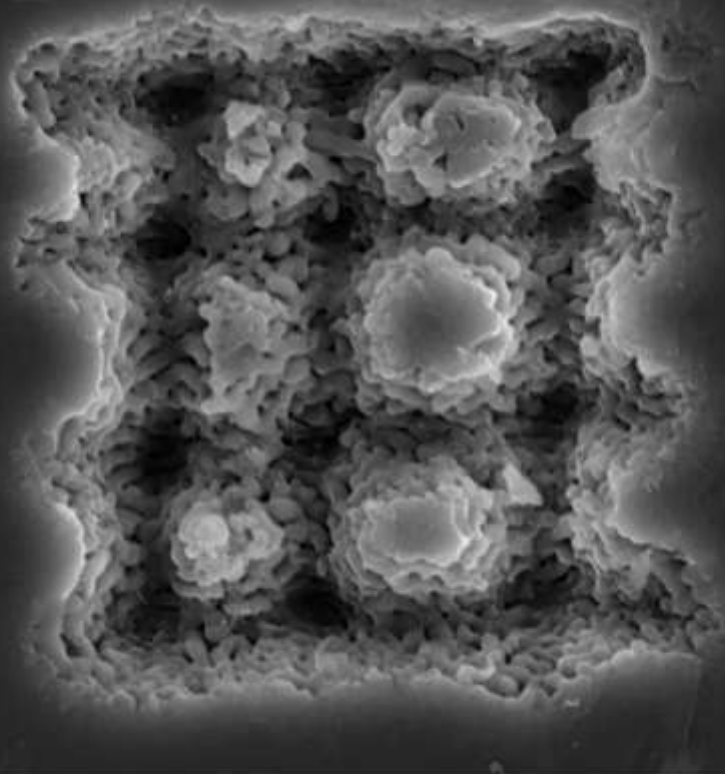

Model 4

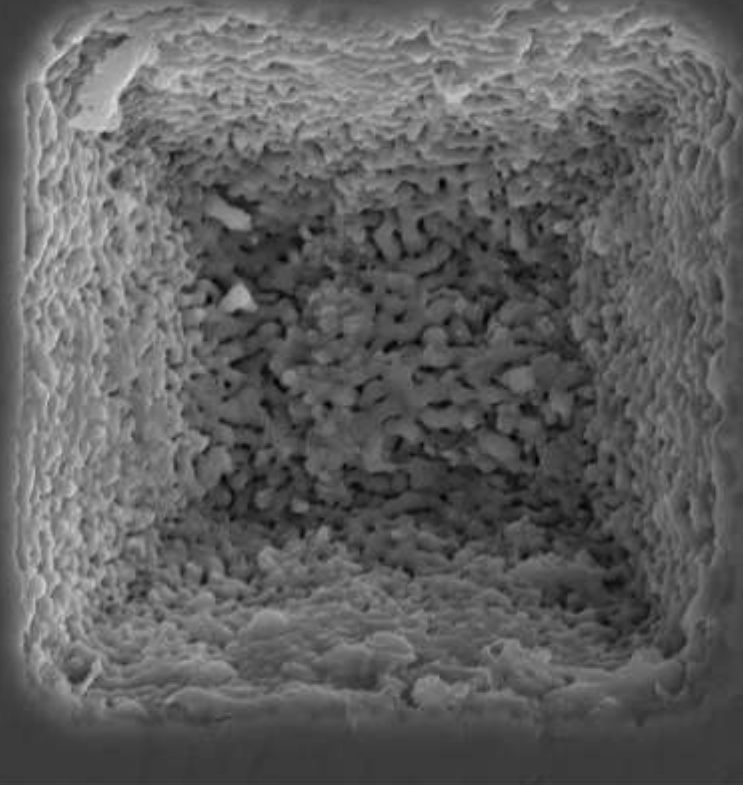

Det LD-SE HV 15kV Gear 高分辨 MAG x 4 000 SEM4000X  
WD 23.67mm HFW 32.03 $\mu$ m Res 3072x2048 Dwell 4 $\mu$ s  $\leftarrow$ 2 $\mu$ m $\rightarrow$

Det LD-SE HV 10kV Gear 高分辨 MAG x 4 000 SEM4000X  
WD 9.06mm HFW 32.03 $\mu$ m Res 3072x2048 Dwell 4 $\mu$ s  $\leftarrow$ 2 $\mu$ m $\rightarrow$

Energy: 50 $\times$ 50

MarkSpeed:10 W

JumpSpeed:100 W

LineInterval:1

n:8

MarkInterval:1000

Scanned area: 15 $\mu$ m

divider:50

layers:40

Model 1

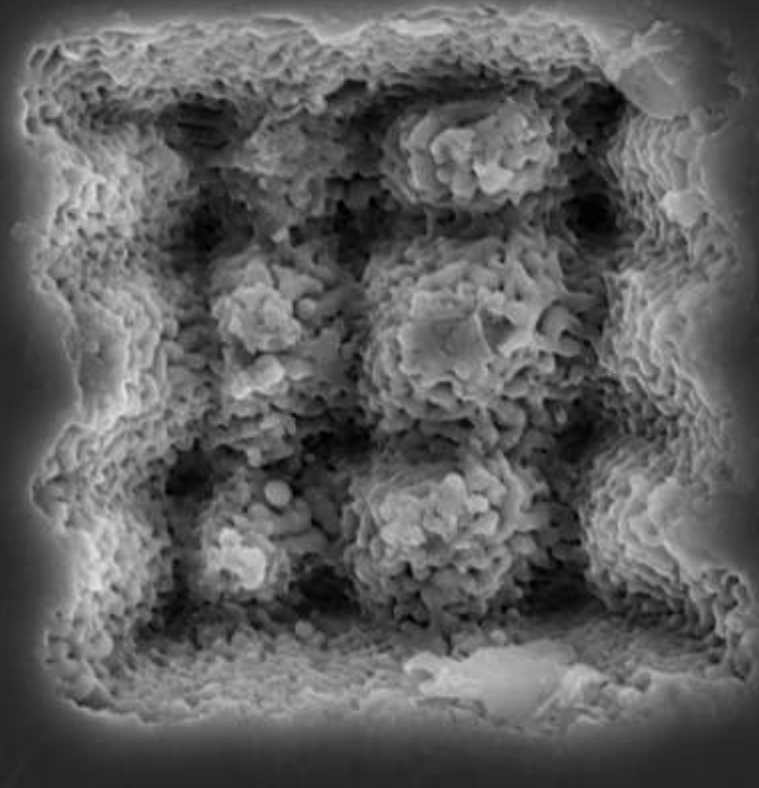

Model 4

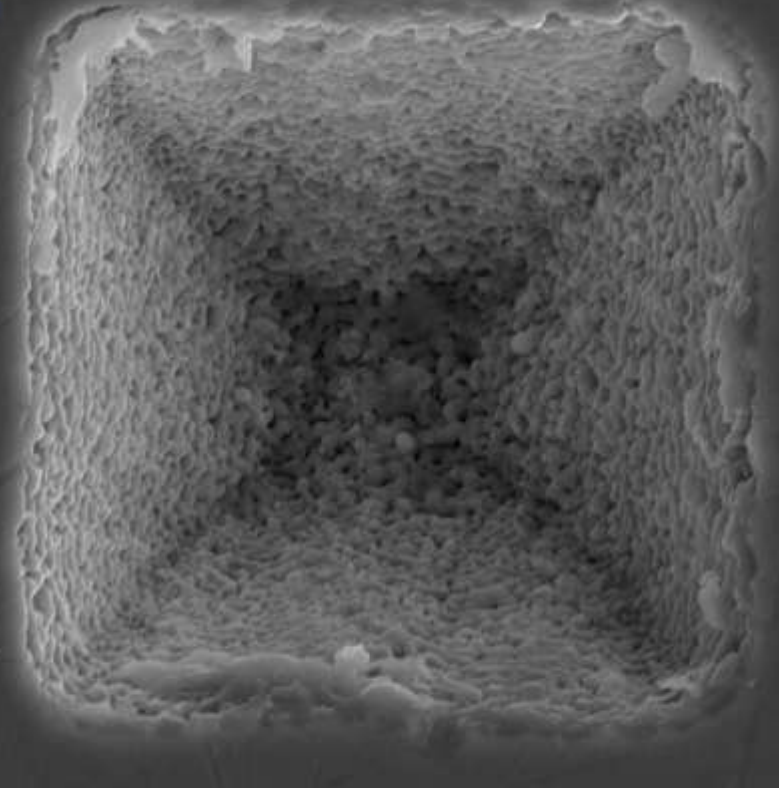

Det LD-SE HV 15kV Gear 高分辨 MAG x 4 000 SEM4000X  
WD 23.67mm HFW 32.03 $\mu$ m Res 3072x2048 Dwell 4 $\mu$ s  $\leftarrow$ 2 $\mu$ m $\rightarrow$

Det LD-SE HV 10kV Gear 高分辨 MAG x 4 000 SEM4000X  
WD 9.07mm HFW 32.03 $\mu$ m Res 3072x2048 Dwell 4 $\mu$ s  $\leftarrow$ 2 $\mu$ m $\rightarrow$

Energy: 50 $\times$ 50

MarkSpeed:10 W

JumpSpeed:100 W

LineInterval:1

n:8

MarkInterval:1000

Scanned area: 15 $\mu$ m

divider:150

layers:2

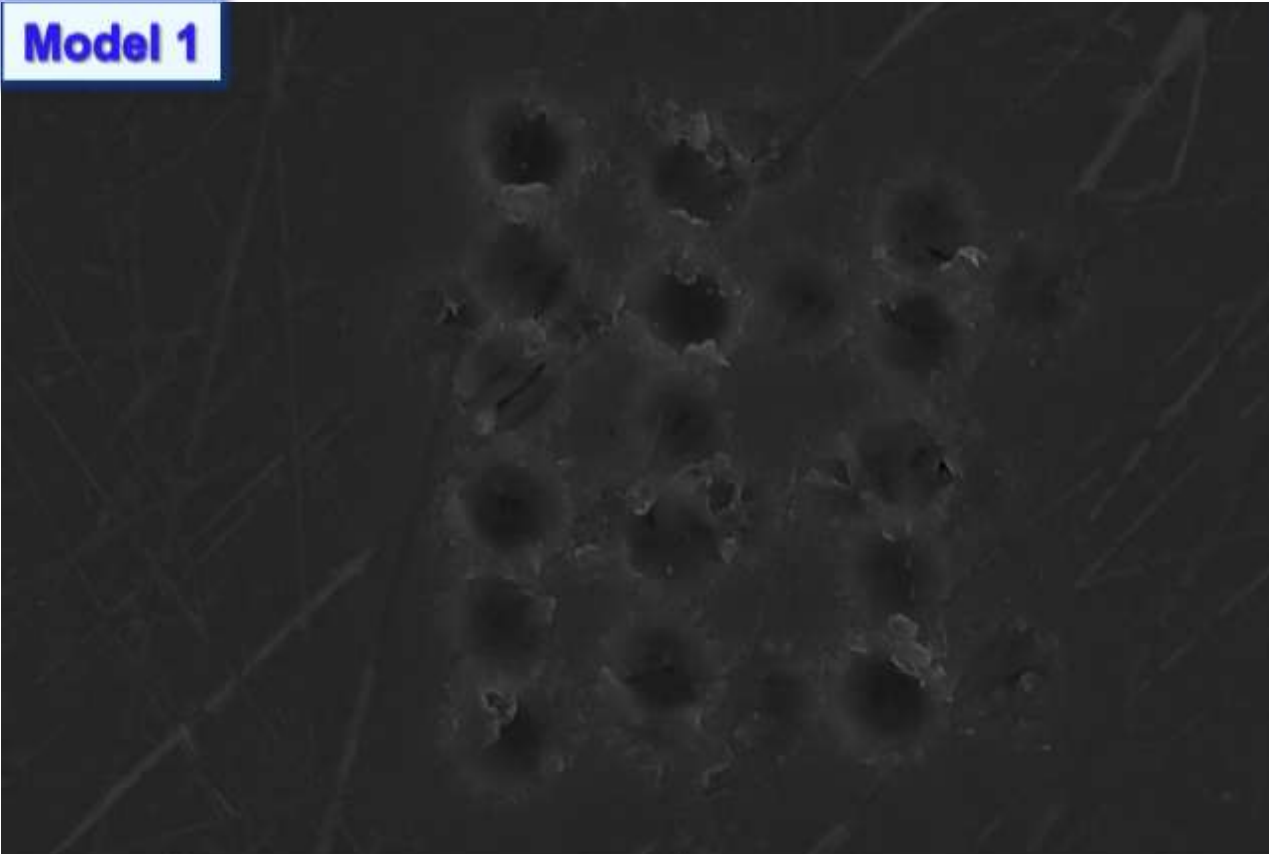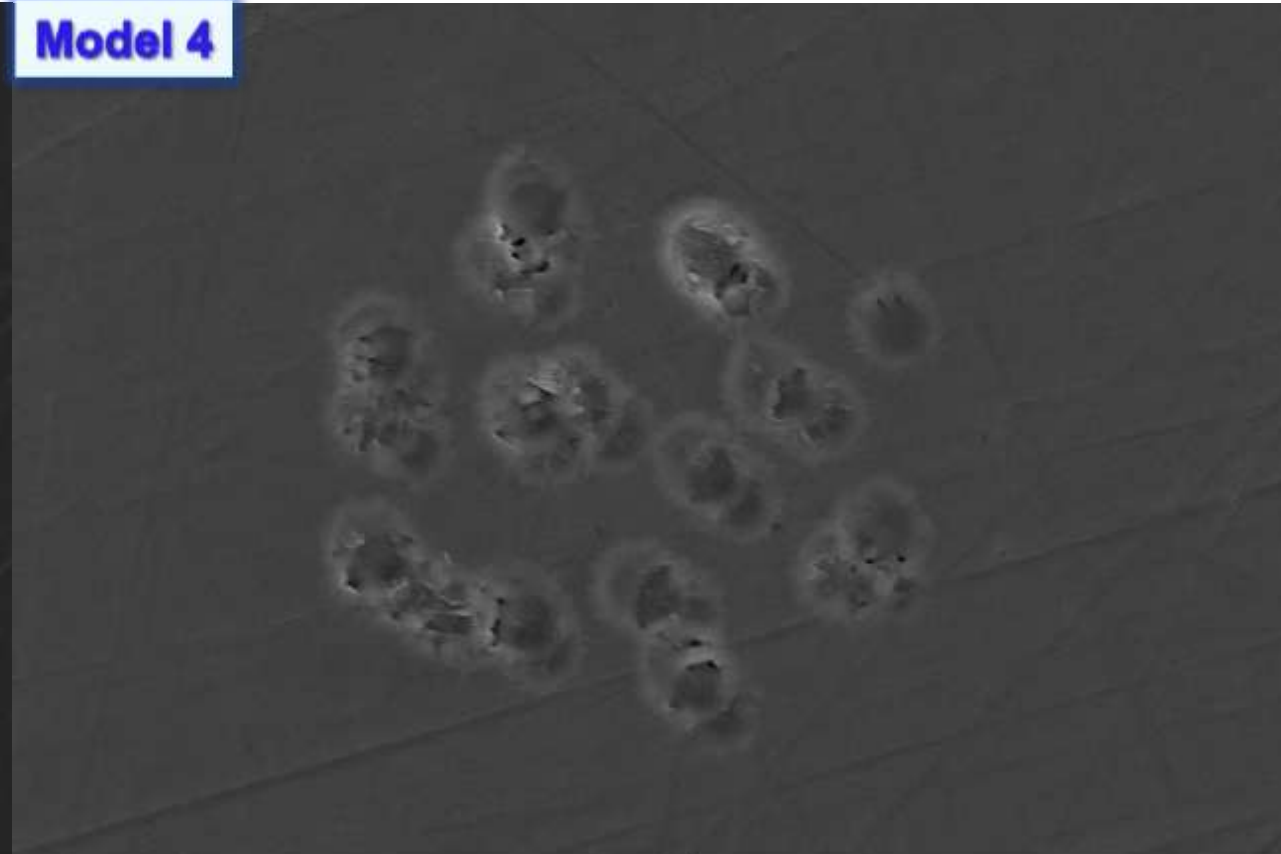

Det LD-SE HV 15kV Gear 高分辨 MAG x 4 000 SEM4000X  
WD 23.65mm HFW 32.03 $\mu$ m Res 3072x2048 Dwell 4 $\mu$ s  $\leftarrow$ 2 $\mu$ m $\rightarrow$

Det LD-SE HV 10kV Gear 高分辨 MAG x 3 500 SEM4000X  
WD 13.98mm HFW 36.61 $\mu$ m Res 3072x2048 Dwell 4 $\mu$ s  $\leftarrow$ 5 $\mu$ m $\rightarrow$

Energy: 50 $\times$ 50

MarkSpeed:10 W

JumpSpeed:100 W

LineInterval:1

n:8

MarkInterval:1000

Scanned area: 15 $\mu$ m

divider:150

layers:20

Model 1

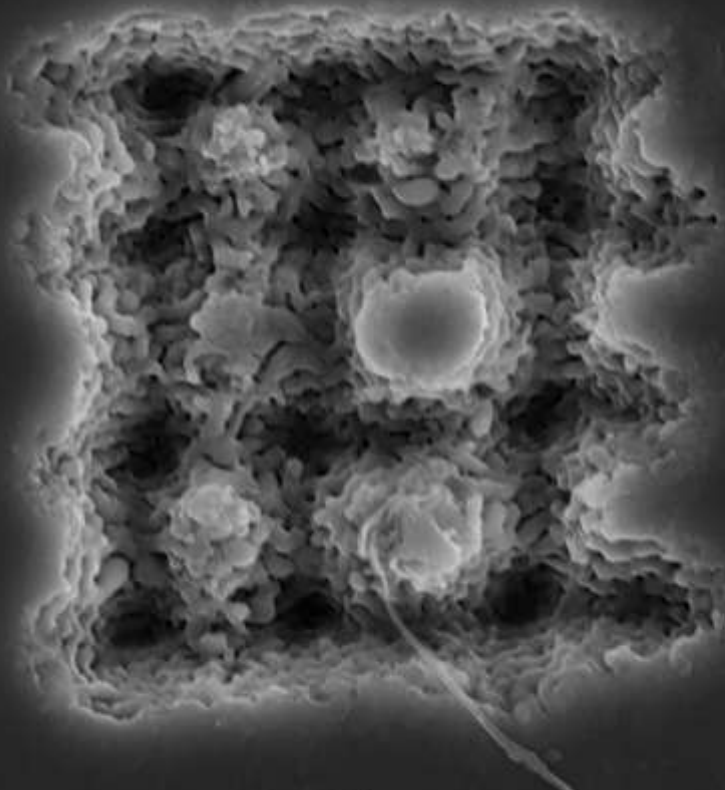

Model 4

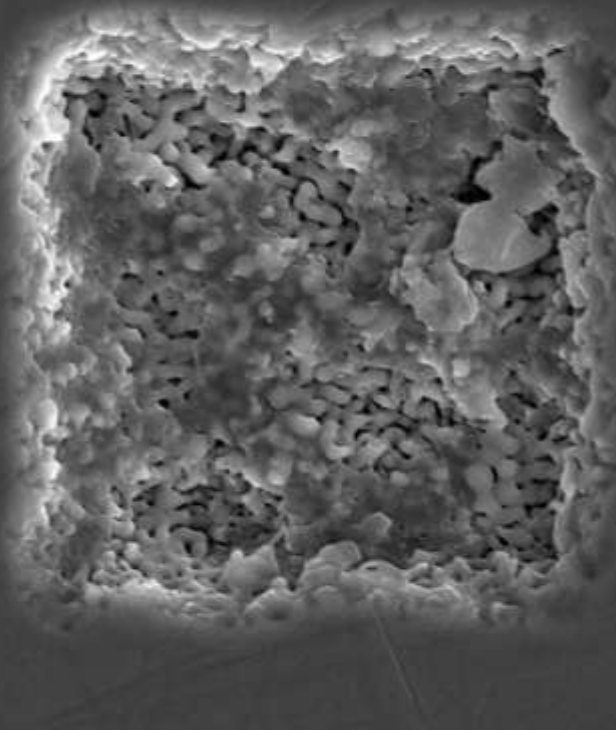

Det LD-SE HV 15kV Gear 高分辨 MAG x 4 000 SEM4000X  
WD 23.65mm HFW 32.03 $\mu$ m Res 3072x2048 Dwell 4 $\mu$ s 2 $\mu$ m

Det LD-SE HV 10kV Gear 高分辨 MAG x 3 500 SEM4000X  
WD 14.02mm HFW 36.61 $\mu$ m Res 3072x2048 Dwell 4 $\mu$ s 5 $\mu$ m

Energy: 50 $\times$ 50

MarkSpeed:10 W

JumpSpeed:100 W

LineInterval:1

n:8

MarkInterval:1000

Scanned area: 15 $\mu$ m

divider:150

layers:40

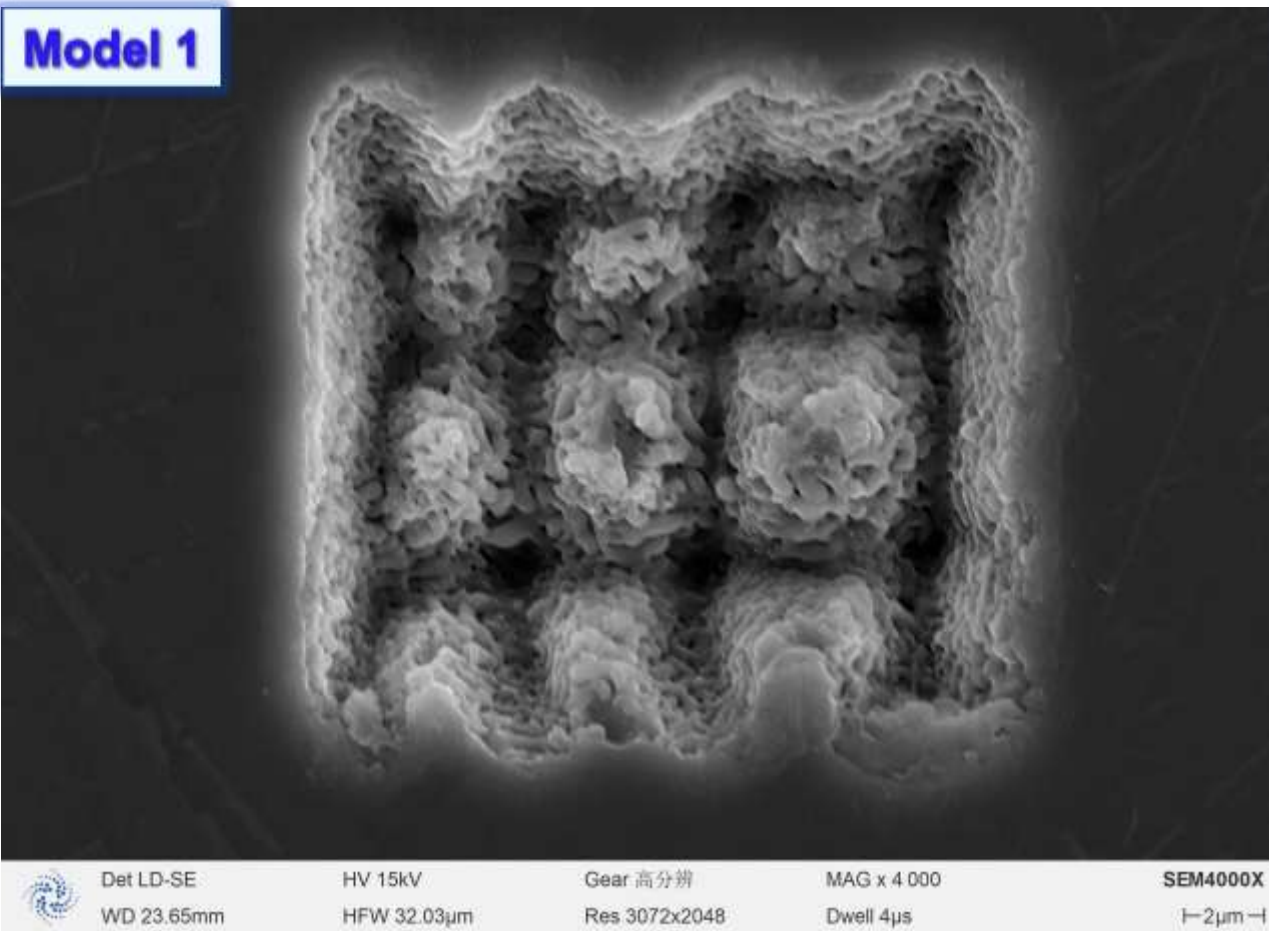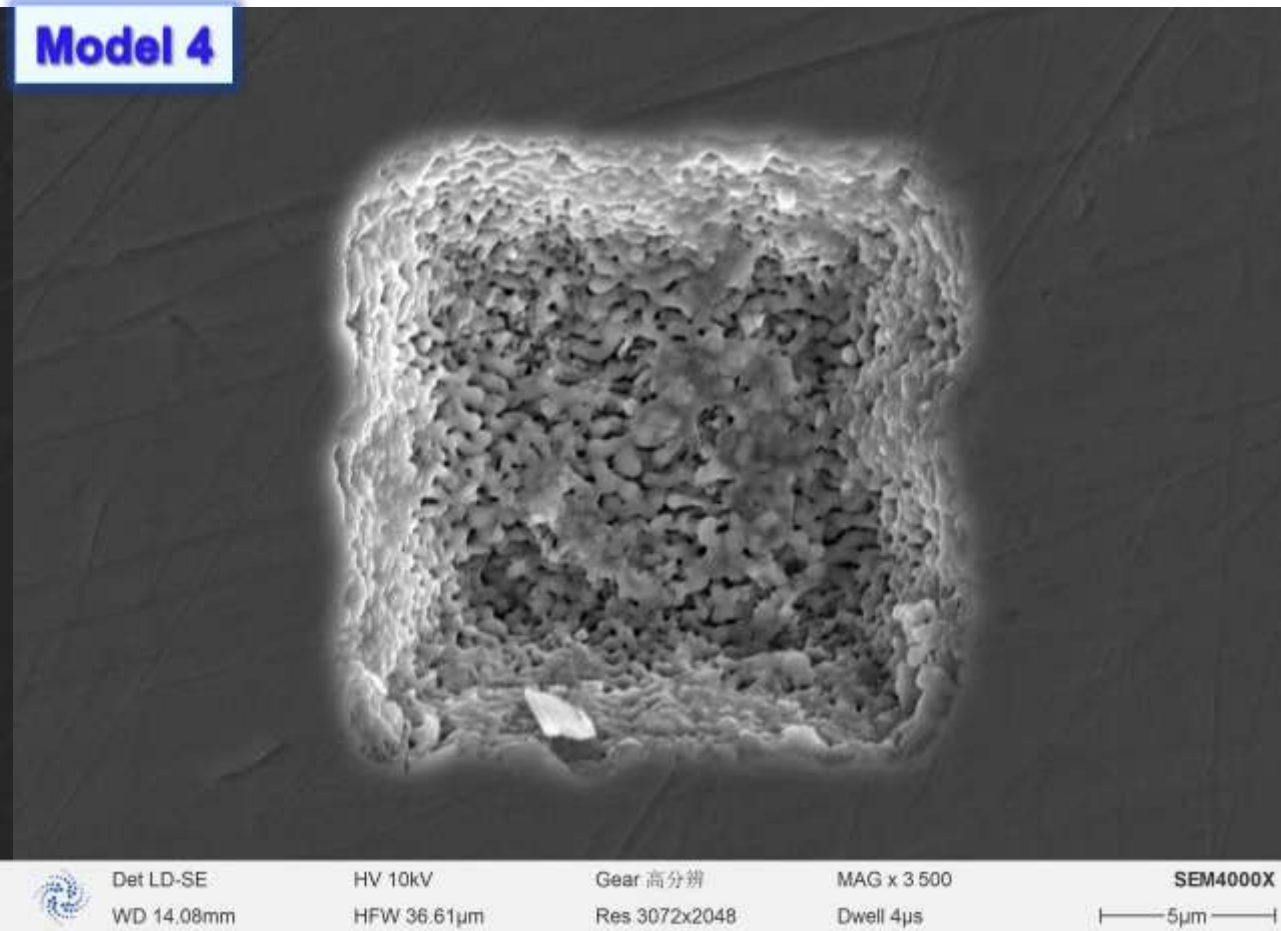

Energy: 50 $\times$ 50

MarkSpeed:10 W

JumpSpeed:100 W

LineInterval:1

n:8

MarkInterval:1000

Scanned area: 20 $\mu$ m

divider:10

layers:2

Model 1

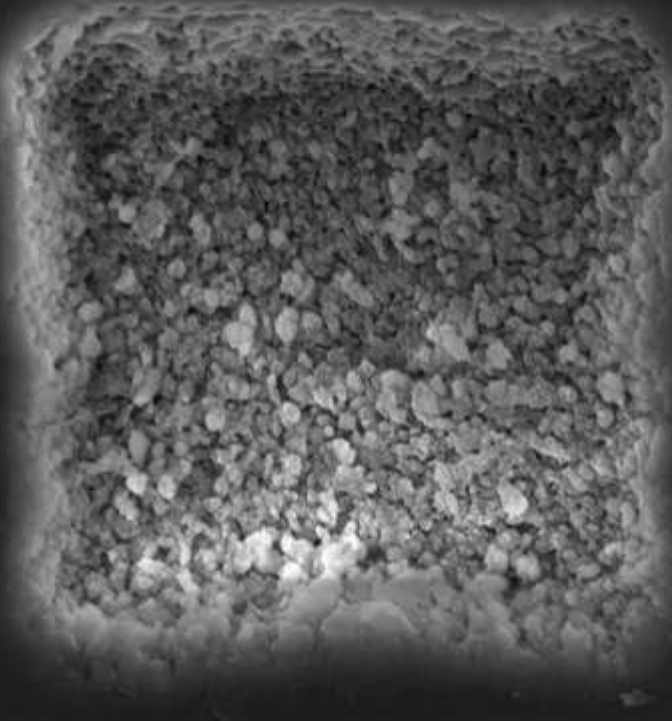

Model 4

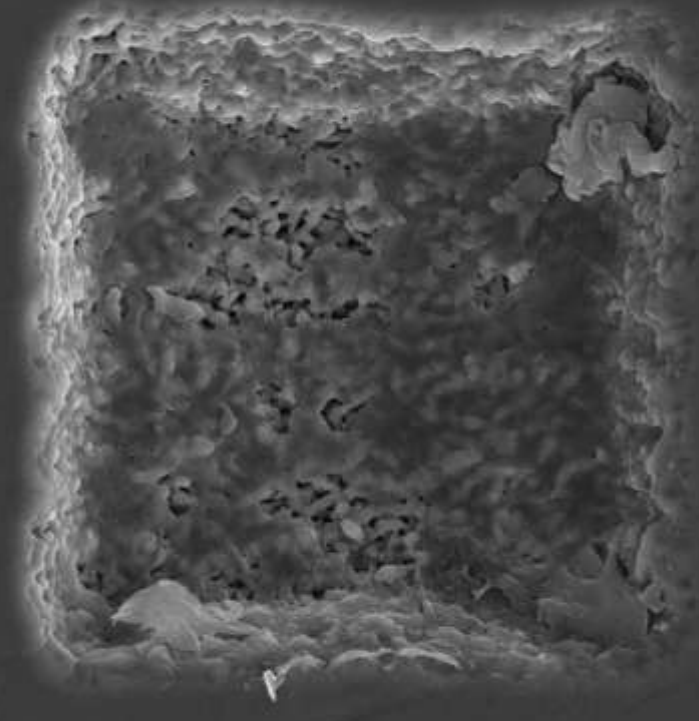

Det LD-SE HV 15kV Gear 高分辨 MAG x 3 000 SEM4000X  
WD 23.67mm HFW 42.71 $\mu$ m Res 3072x2048 Dwell 4 $\mu$ s 5 $\mu$ m

Det LD-SE HV 10kV Gear 高分辨 MAG x 3 000 SEM4000X  
WD 9.03mm HFW 42.71 $\mu$ m Res 3072x2048 Dwell 4 $\mu$ s 5 $\mu$ m

Energy: 50 $\times$ 50

MarkSpeed:10 W

JumpSpeed:100 W

LineInterval:1

n:7

MarkInterval:1000

Scanned area: 20 $\mu$ m

divider:10

layers:20

Model 1

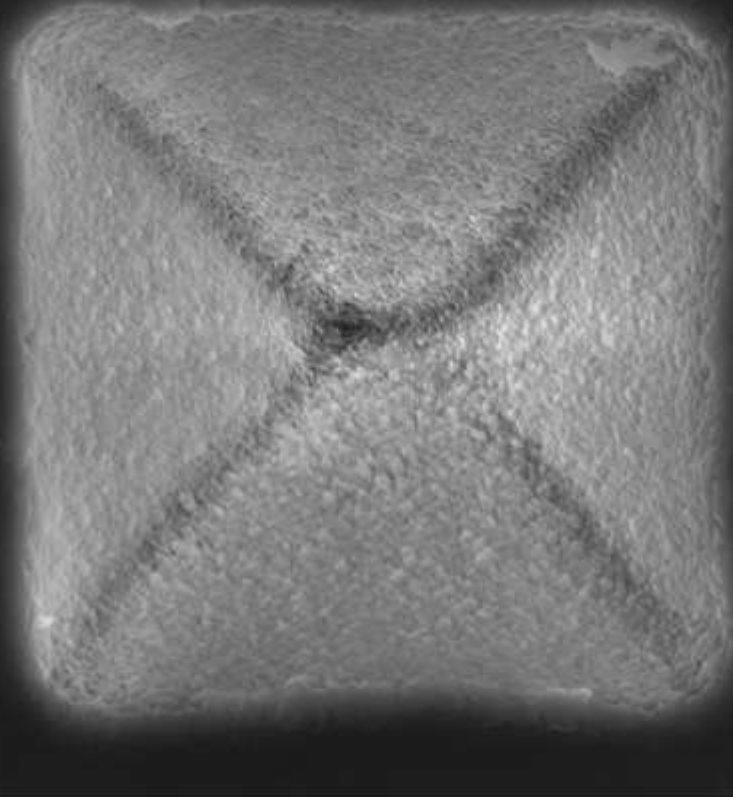

Det LD-SE HV 15kV Gear 高分辨 MAG x 3 000 SEM4000X  
WD 23.67mm HFW 42.71 $\mu$ m Res 3072x2048 Dwell 4 $\mu$ s  
5 $\mu$ m

Model 4

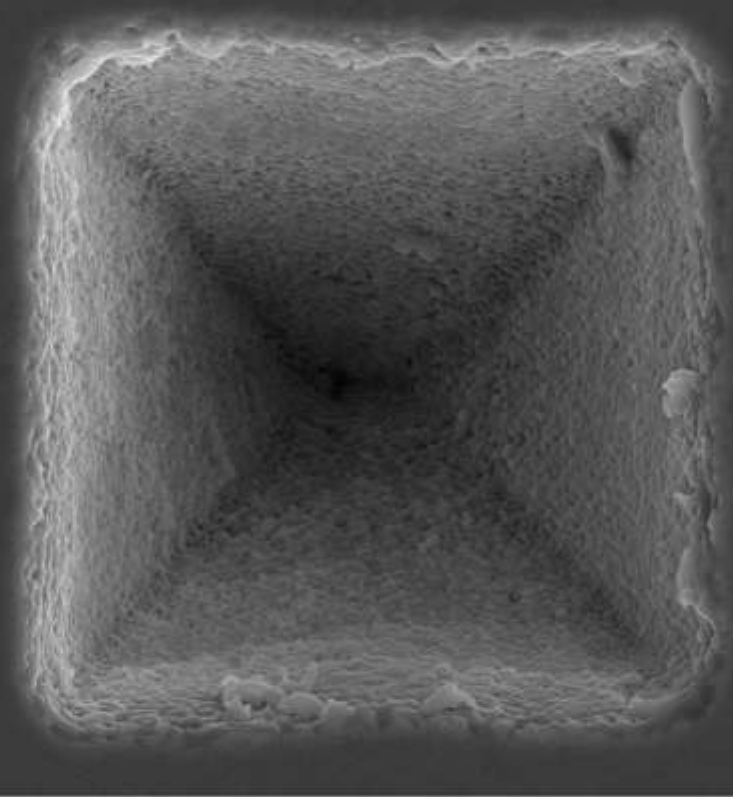

Det LD-SE HV 10kV Gear 高分辨 MAG x 3 000 SEM4000X  
WD 9.03mm HFW 42.71 $\mu$ m Res 3072x2048 Dwell 4 $\mu$ s  
5 $\mu$ m

Energy: 50 $\times$ 50

MarkSpeed:10 W

JumpSpeed:100 W

LineInterval:1

n:7

MarkInterval:1000

Scanned area: 20 $\mu$ m

divider:10

layers:40

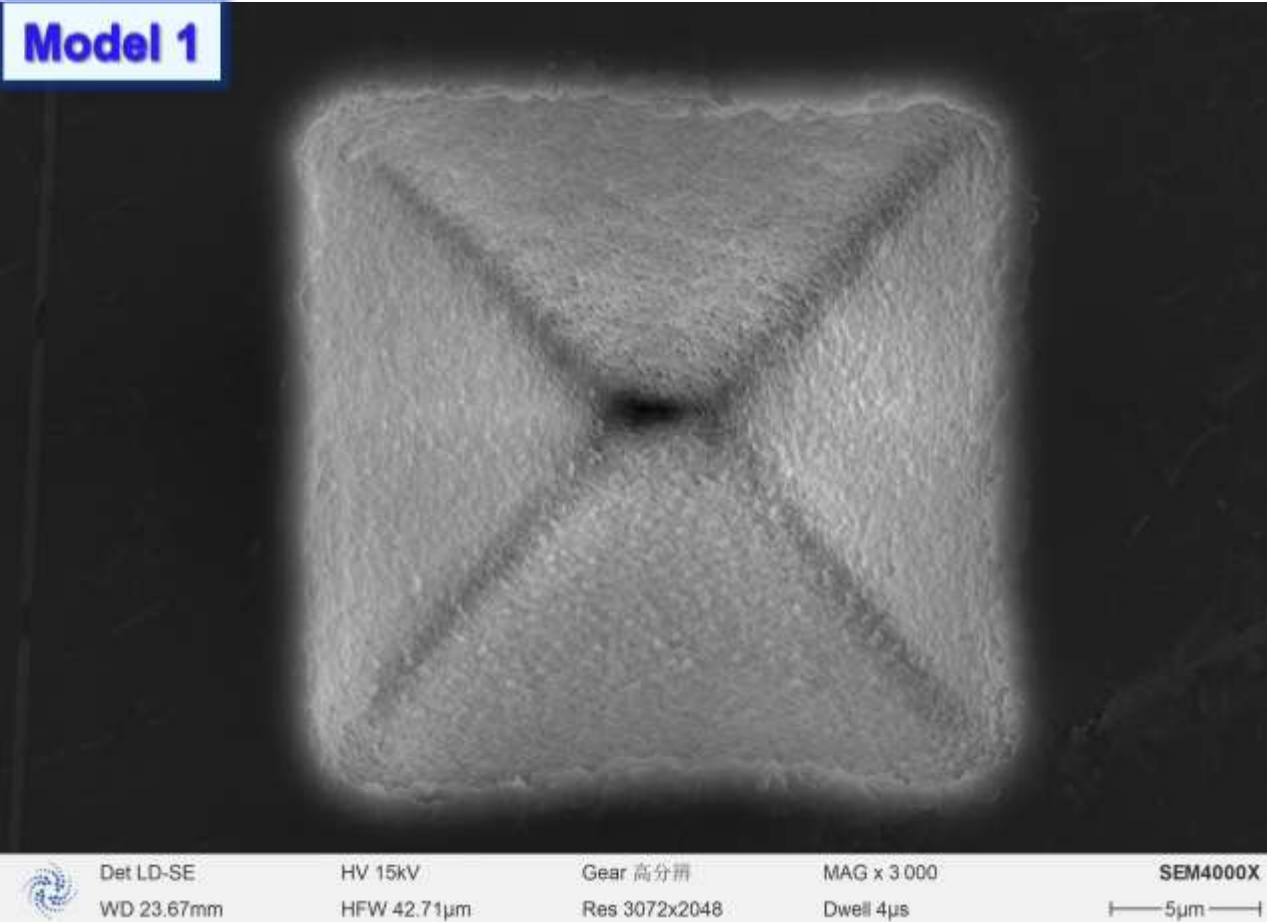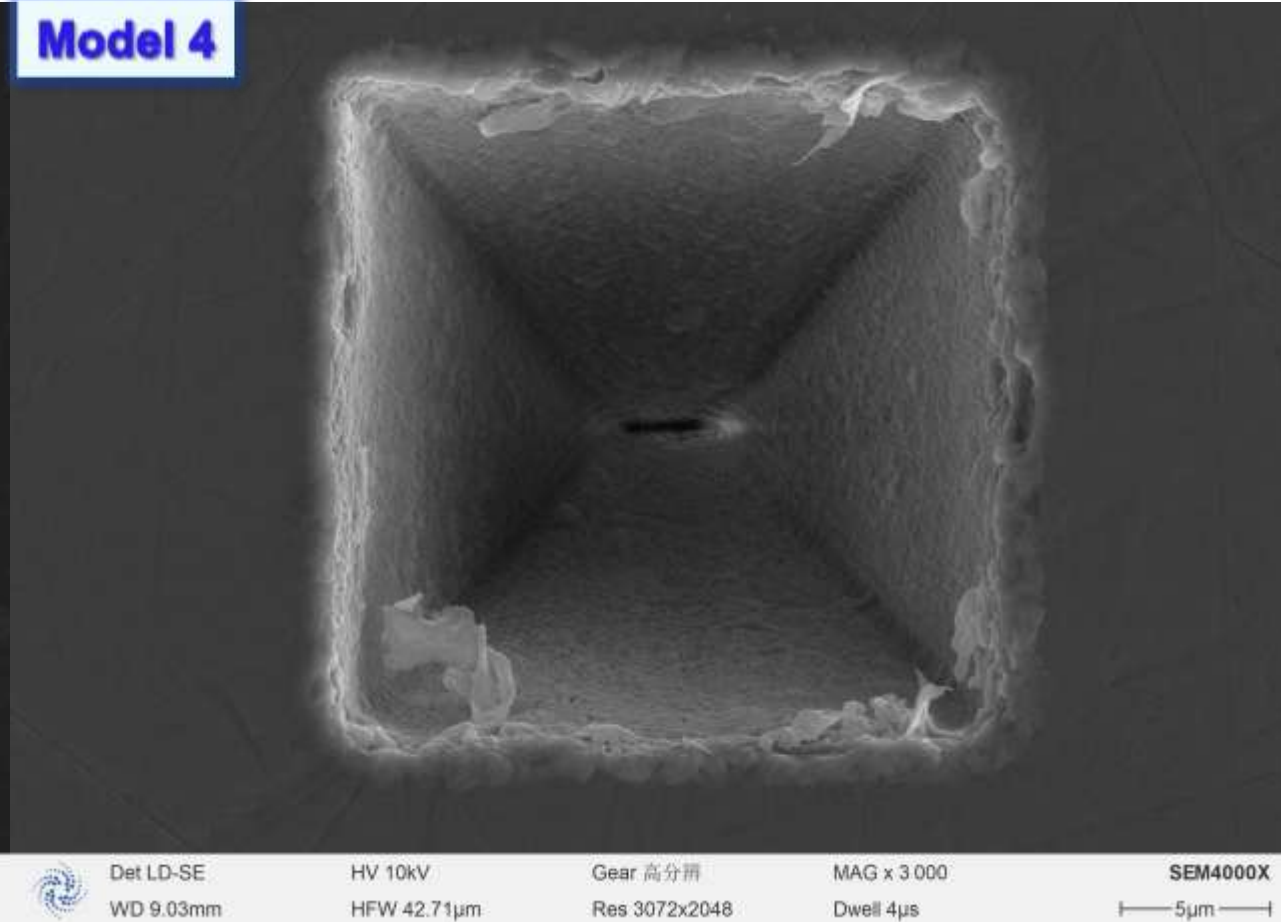

Energy: 50 $\times$ 50

MarkSpeed:10 W

JumpSpeed:100 W

LineInterval:1

n:7

MarkInterval:1000

Scanned area: 20 $\mu$ m

divider:50

layers:2

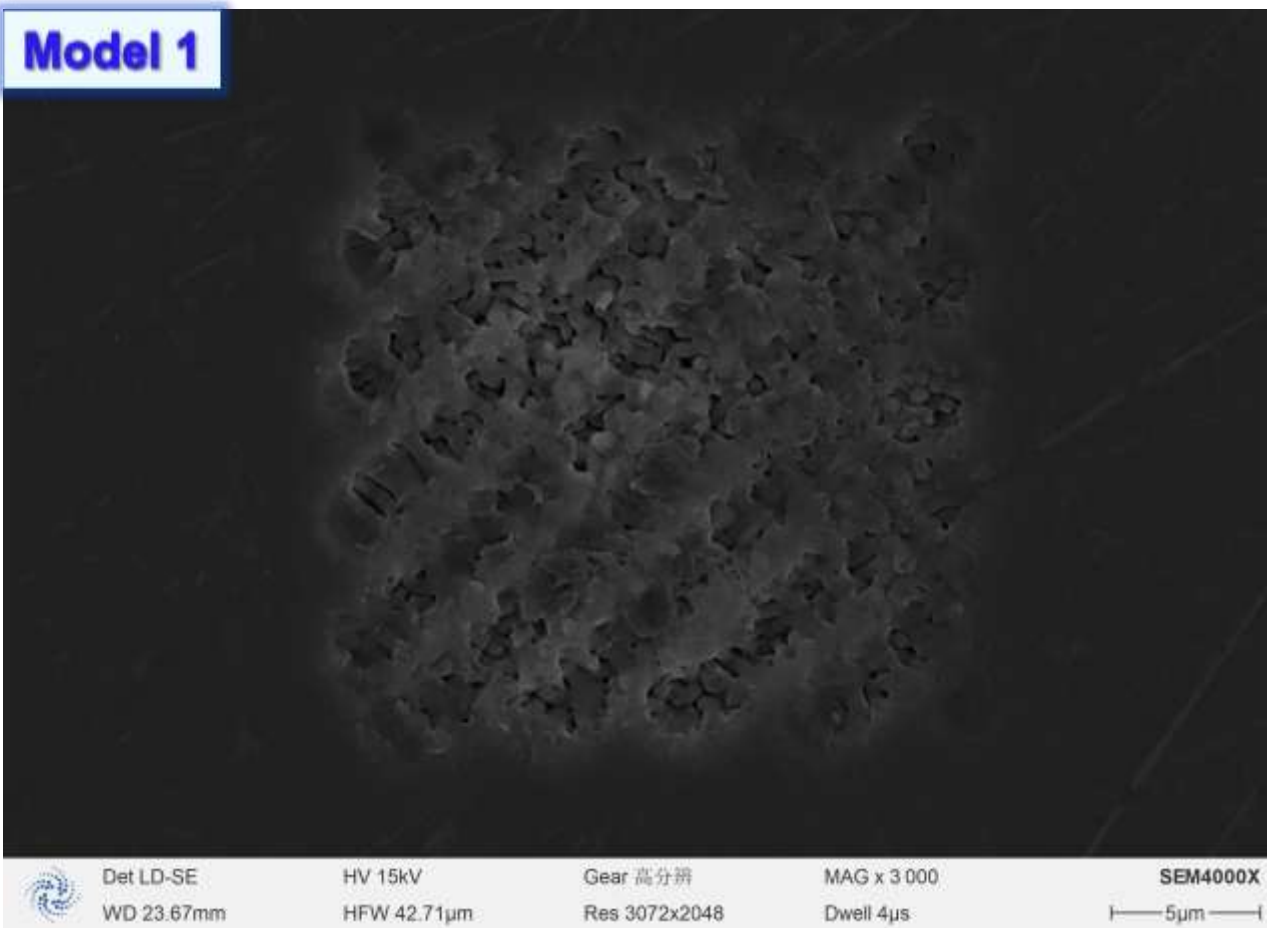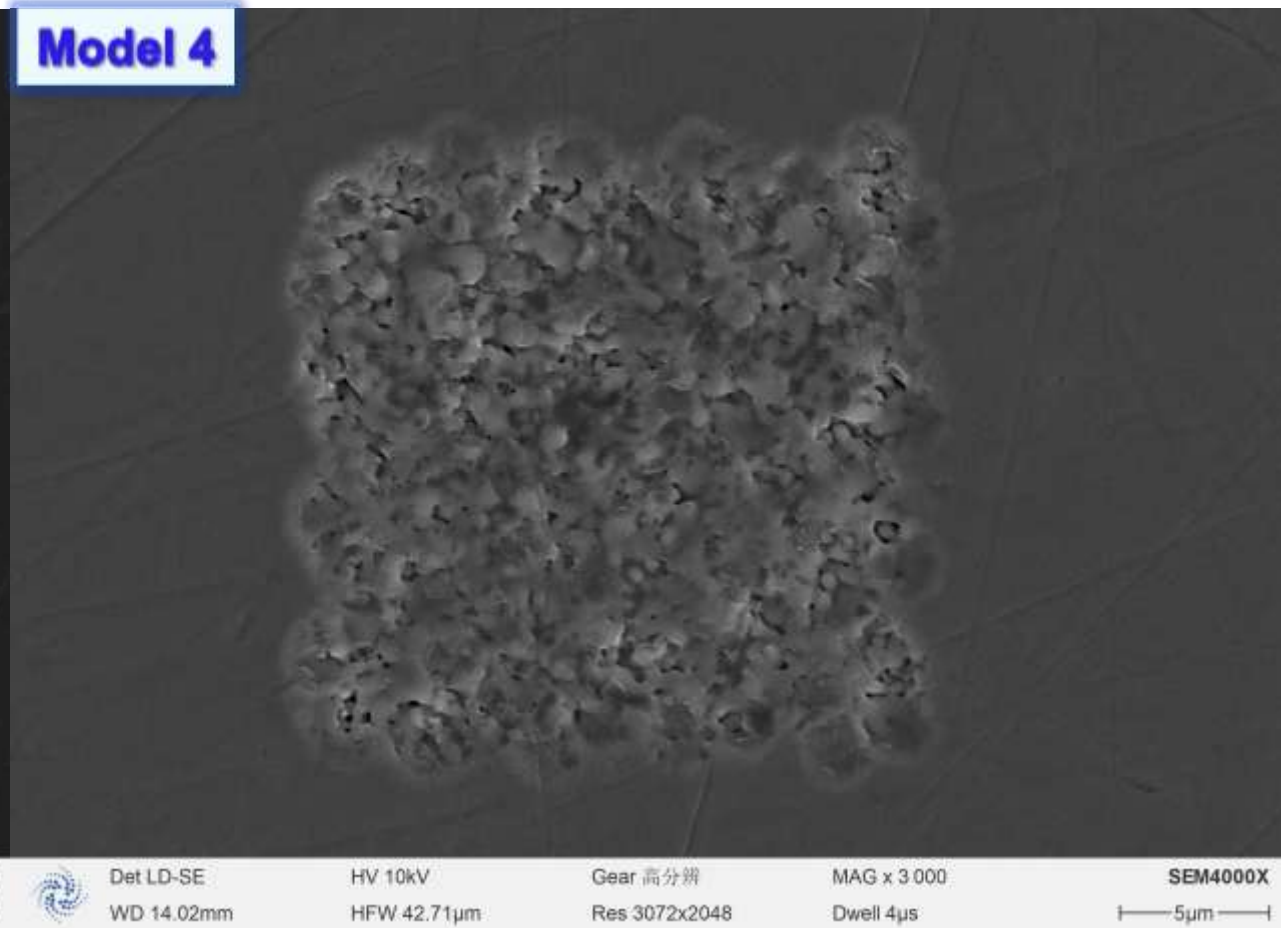

Energy: 50 $\times$ 50

MarkSpeed:10 W

JumpSpeed:100 W

LineInterval:1

n:7

MarkInterval:1000

Scanned area: 20 $\mu$ m

divider:50

layers:20

Model 1

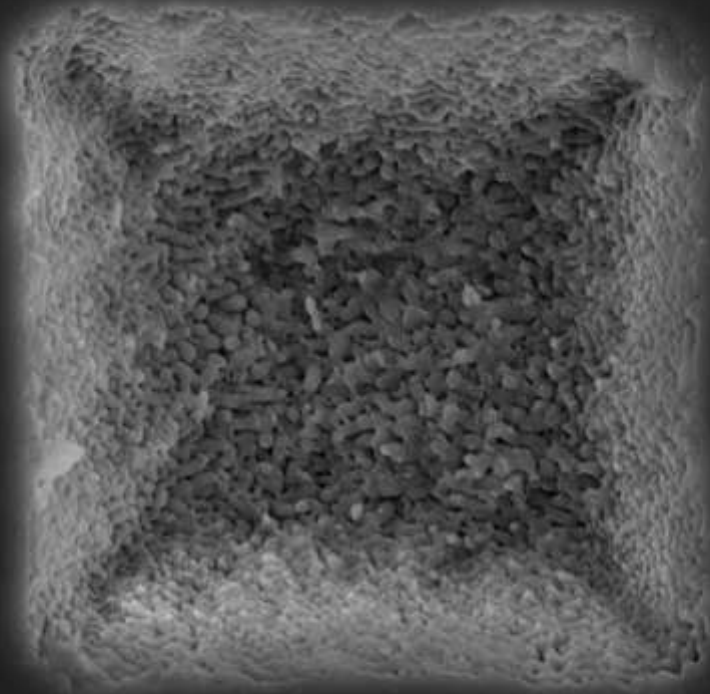

Det LD-SE HV 15kV Gear 高分辨 MAG x 3 000  
WD 23.67mm HFW 42.71 $\mu$ m Res 3072x2048 Dwell 4 $\mu$ s

SEM4000X  
5 $\mu$ m

Model 4

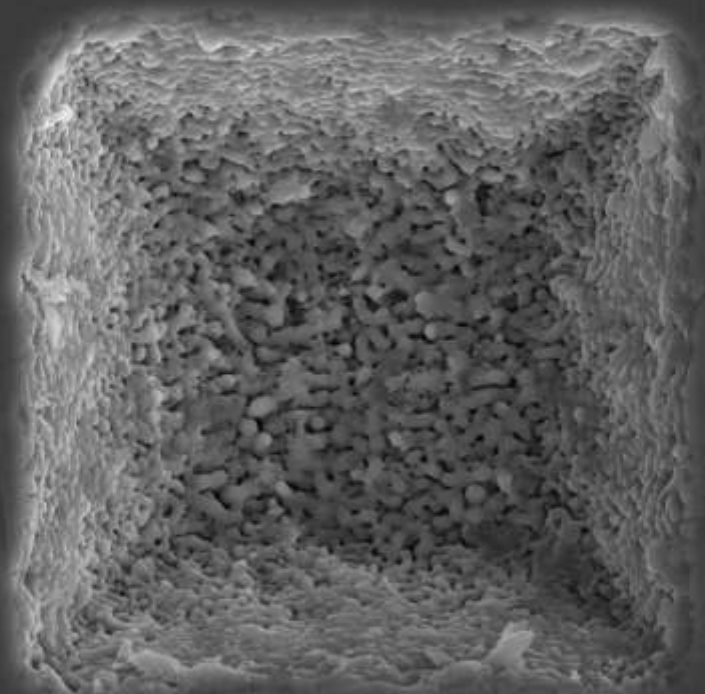

Det LD-SE HV 10kV Gear 高分辨 MAG x 3 000  
WD 9.03mm HFW 42.71 $\mu$ m Res 3072x2048 Dwell 4 $\mu$ s

SEM4000X  
5 $\mu$ m

Energy: 50 $\times$ 50

MarkSpeed:10 W

JumpSpeed:100 W

LineInterval:1

n:7

MarkInterval:1000

Scanned area: 20μm

divider:50

layers:40

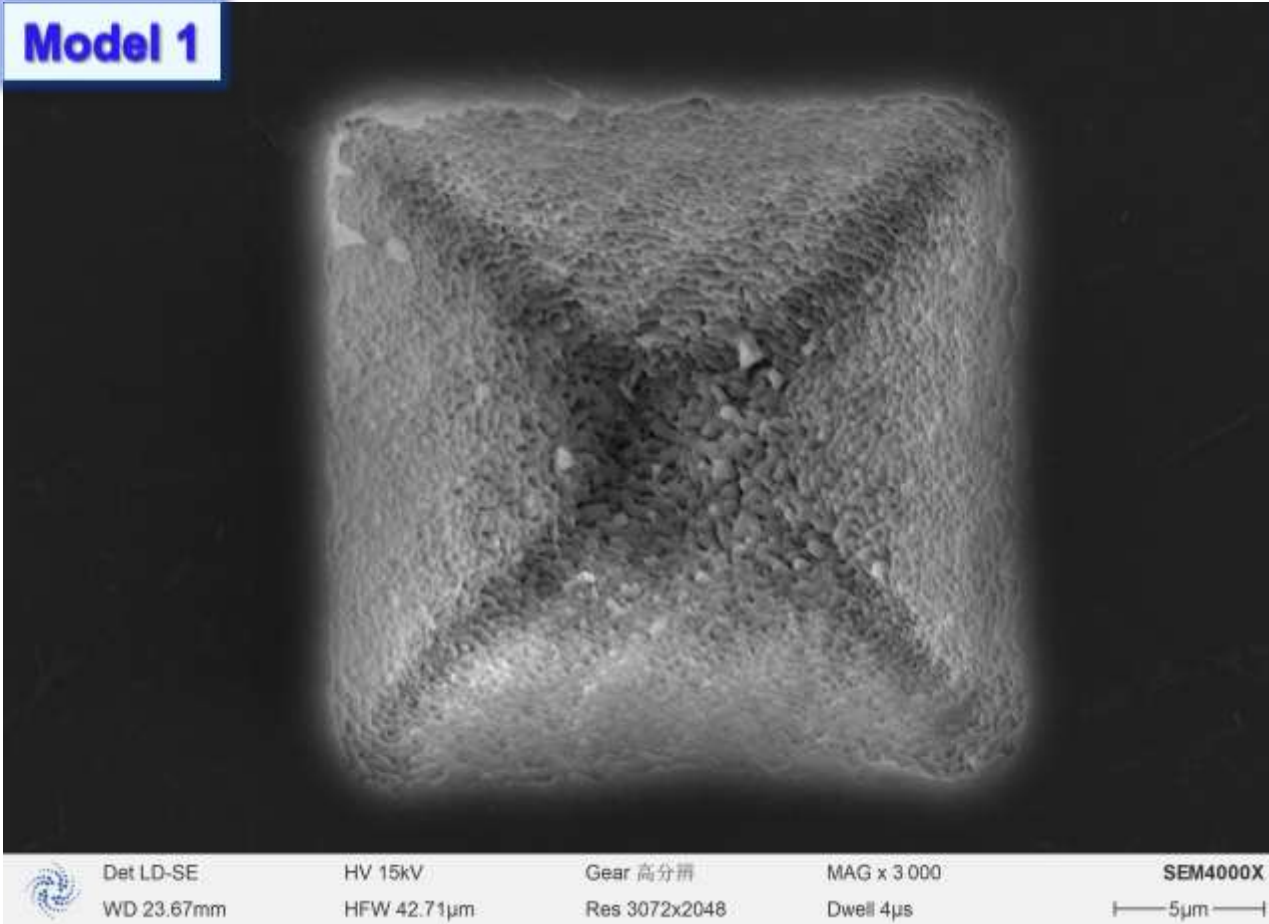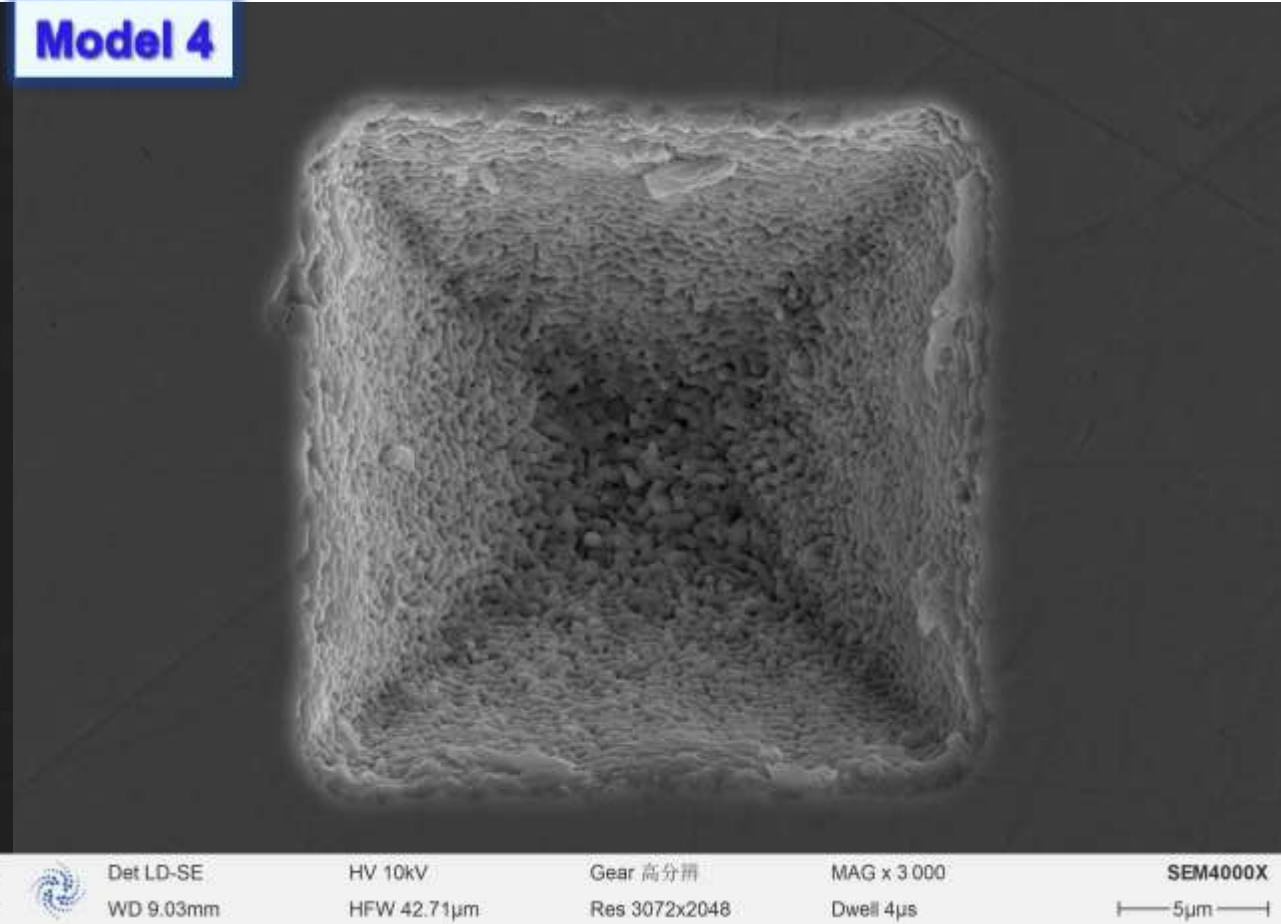

Energy: 50×50

MarkSpeed:10 W

JumpSpeed:100 W

LineInterval:1

n:7

MarkInterval:1000

Scanned area: 20 $\mu$ m

divider:150

layers:2

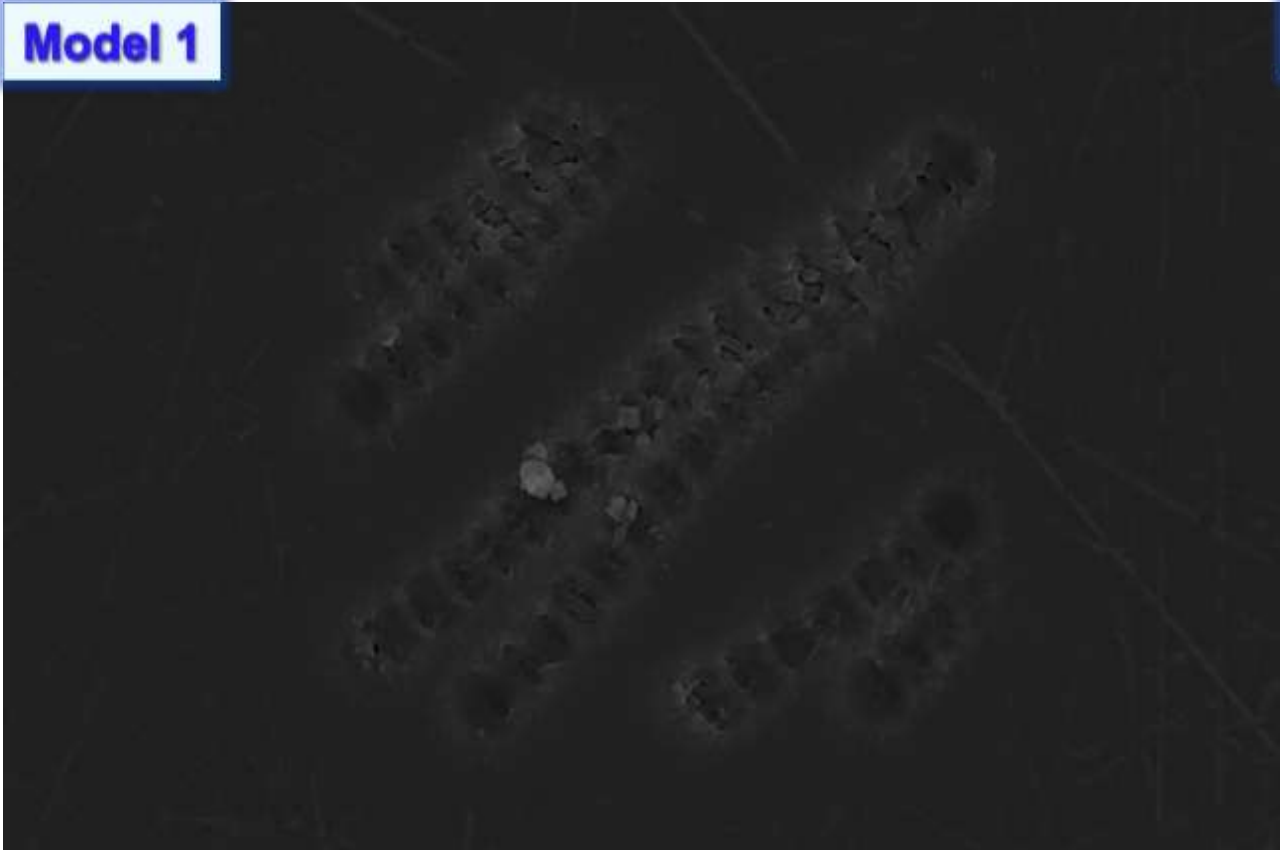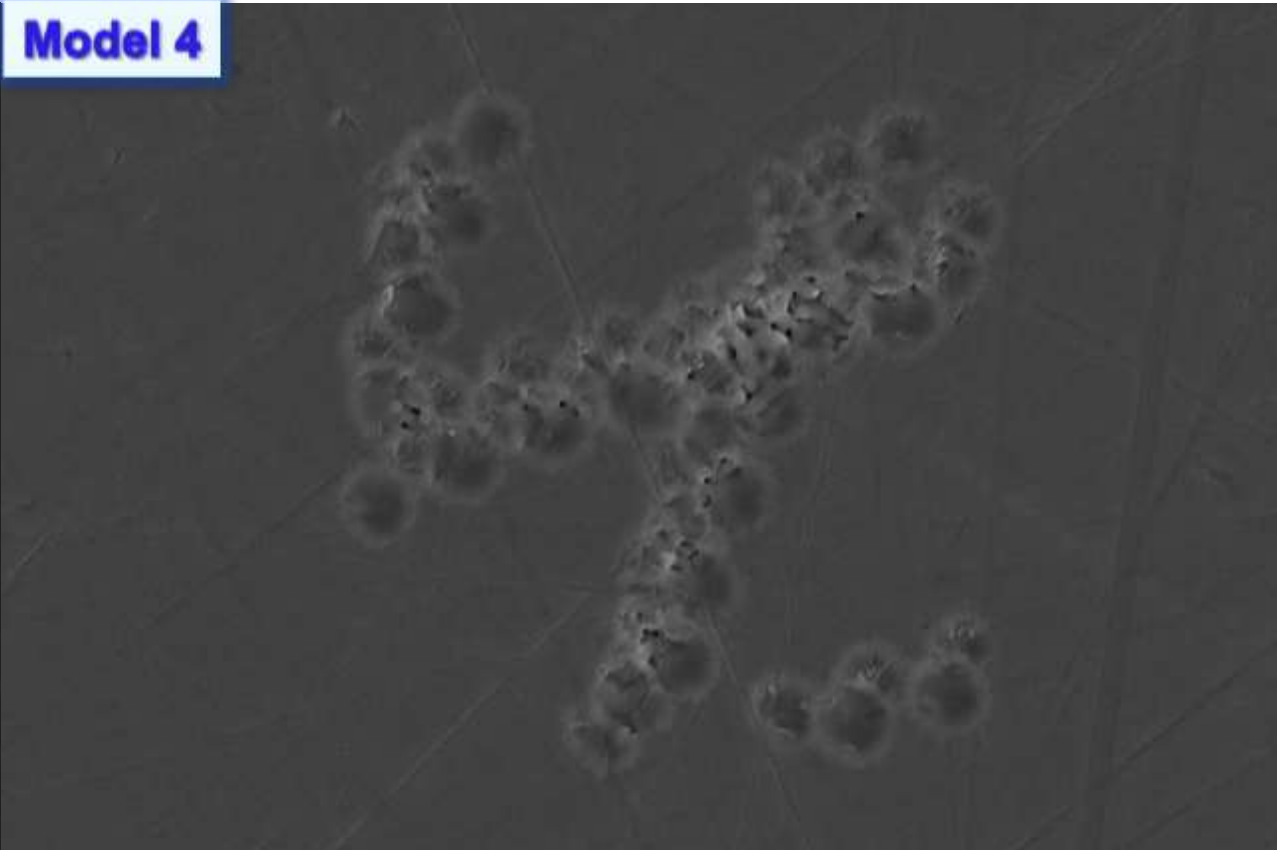

Det LD-SE HV 15kV Gear 高分辨 MAG x 3 000 SEM4000X  
WD 23.67mm HFW 42.71 $\mu$ m Res 3072x2048 Dwell 4 $\mu$ s  
5 $\mu$ m

Det LD-SE HV 10kV Gear 高分辨 MAG x 3 000 SEM4000X  
WD 14.09mm HFW 42.71 $\mu$ m Res 3072x2048 Dwell 4 $\mu$ s  
5 $\mu$ m

Energy: 50 $\times$ 50

MarkSpeed:10 W

JumpSpeed:100 W

LineInterval:1

n:7

MarkInterval:1000

Scanned area: 20 $\mu$ m

divider:150

layers:20

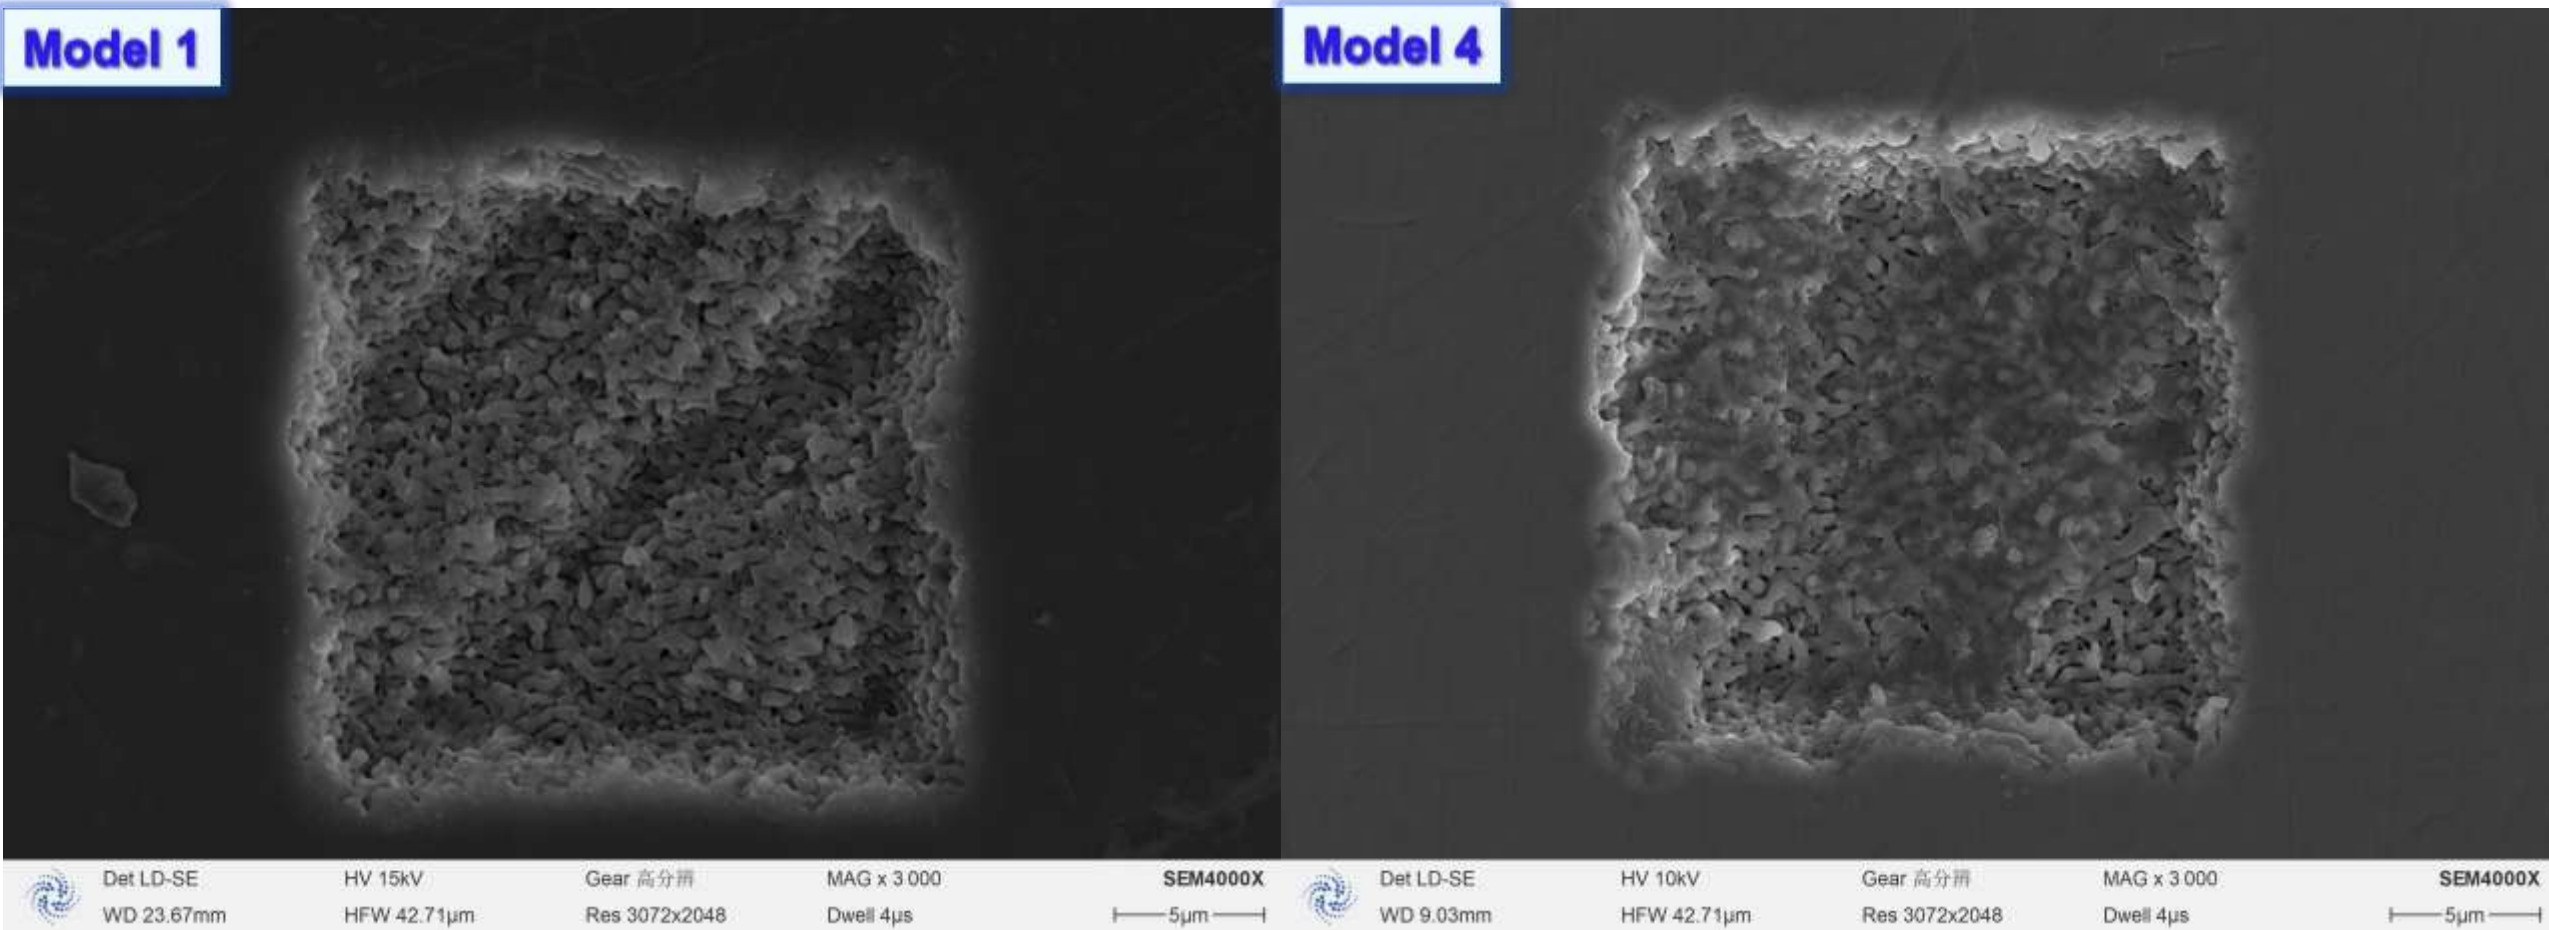

Energy: 50 $\times$ 50

MarkSpeed:10 W

JumpSpeed:100 W

LineInterval:1

n:7

MarkInterval:1000

Scanned area: 20μm

divider:150

layers:40

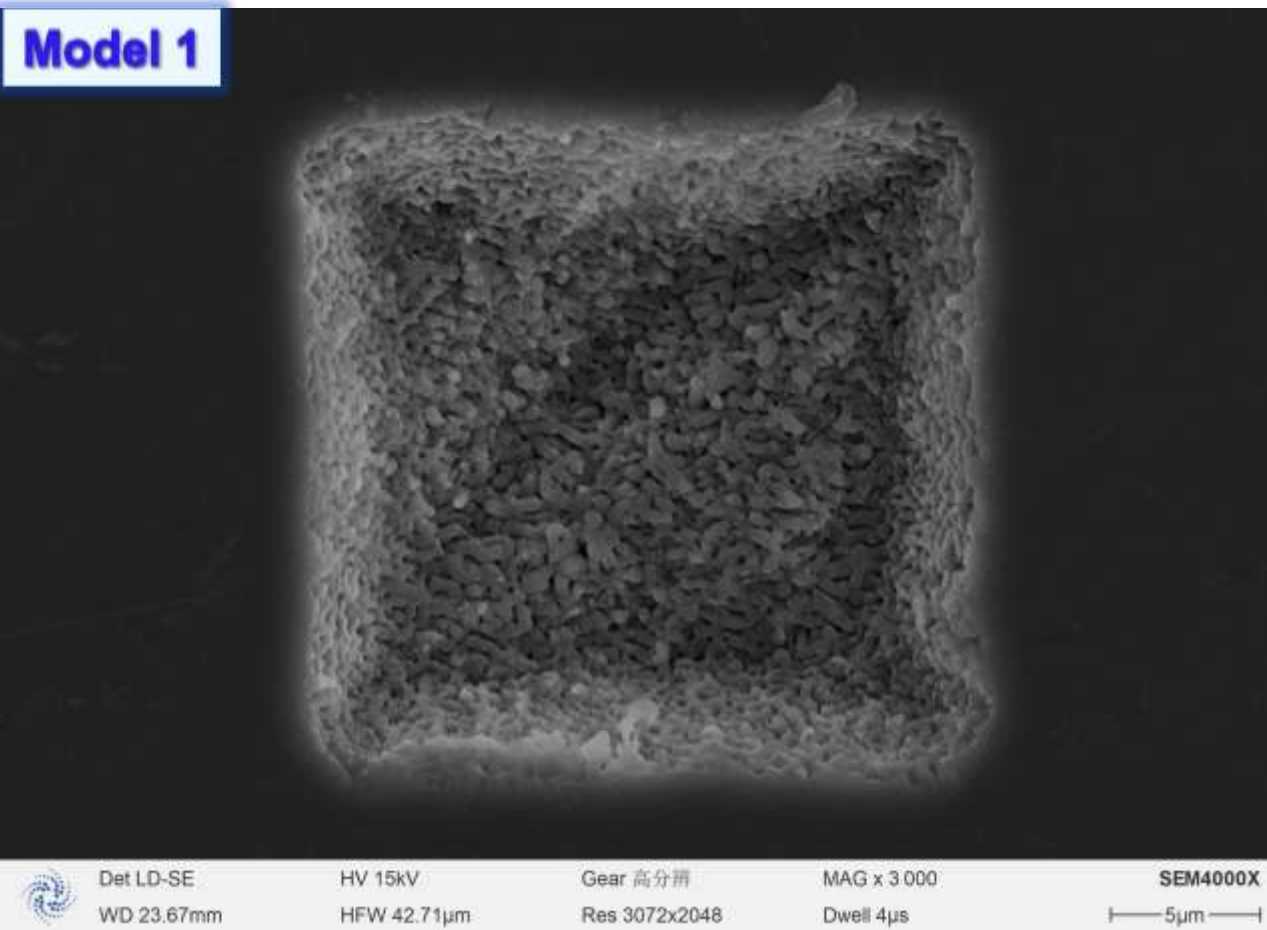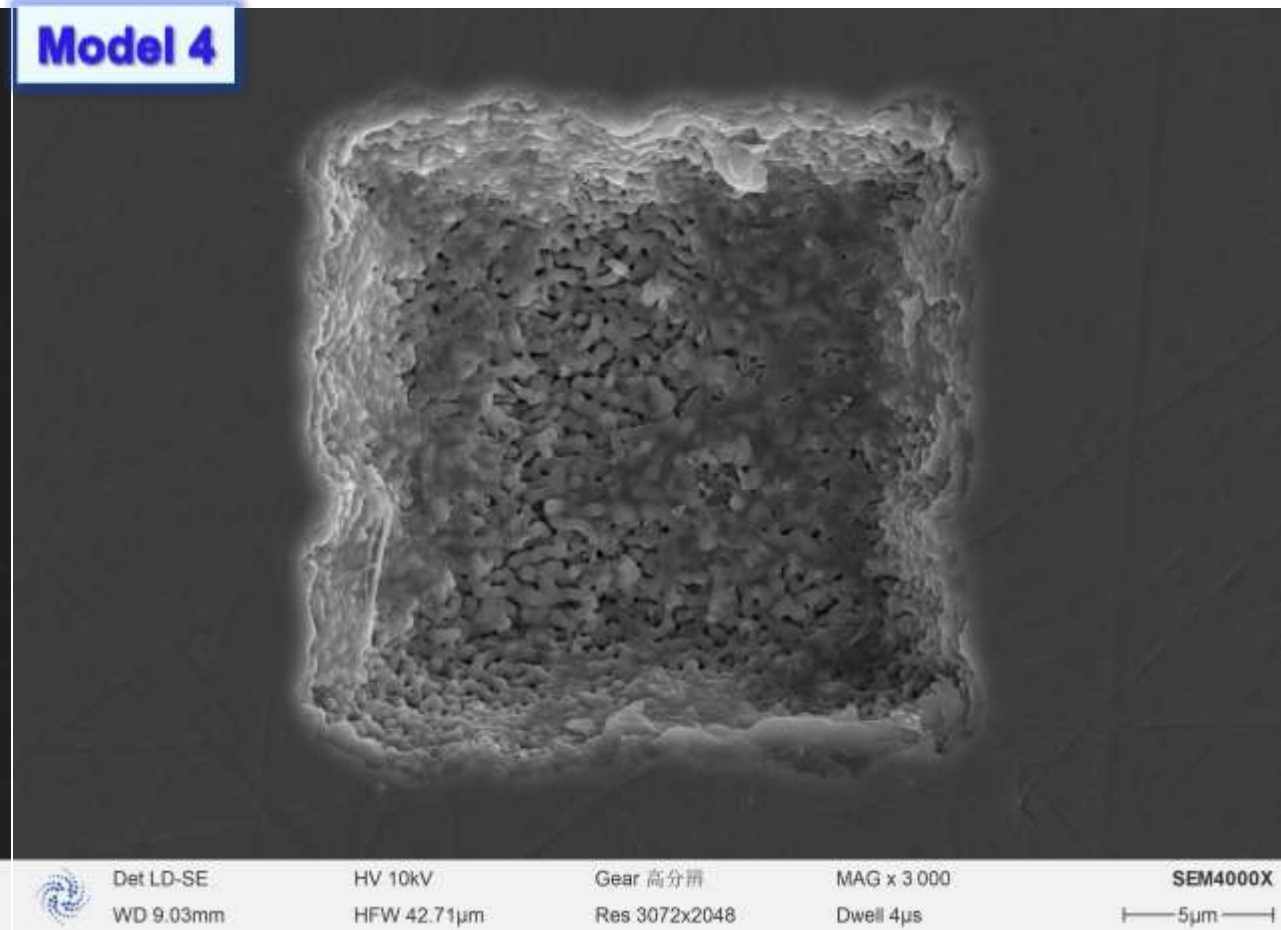

Energy: 50×50

MarkSpeed:10 W

JumpSpeed:100 W

LineInterval:1

n:7

MarkInterval:1000

Scanned area: 32μm

divider:10

layers:2

Model 1

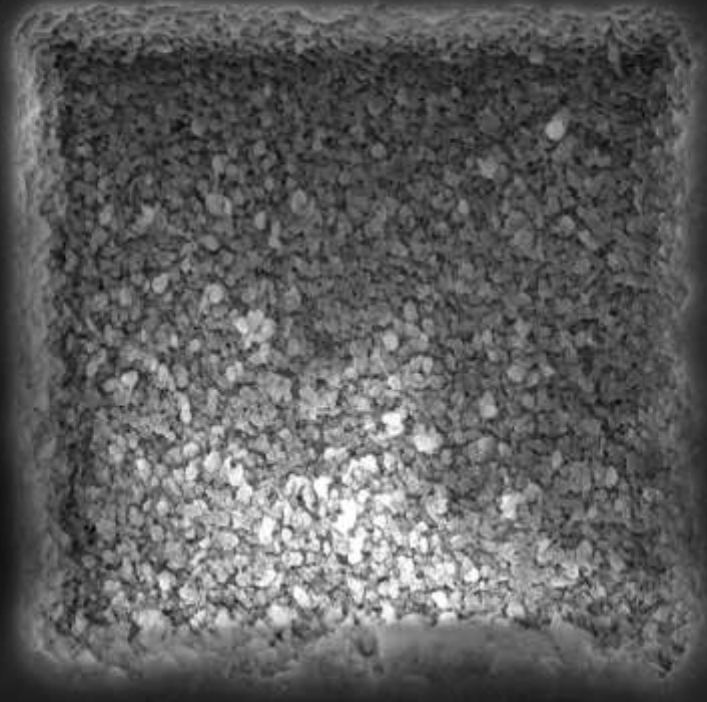

Model 4

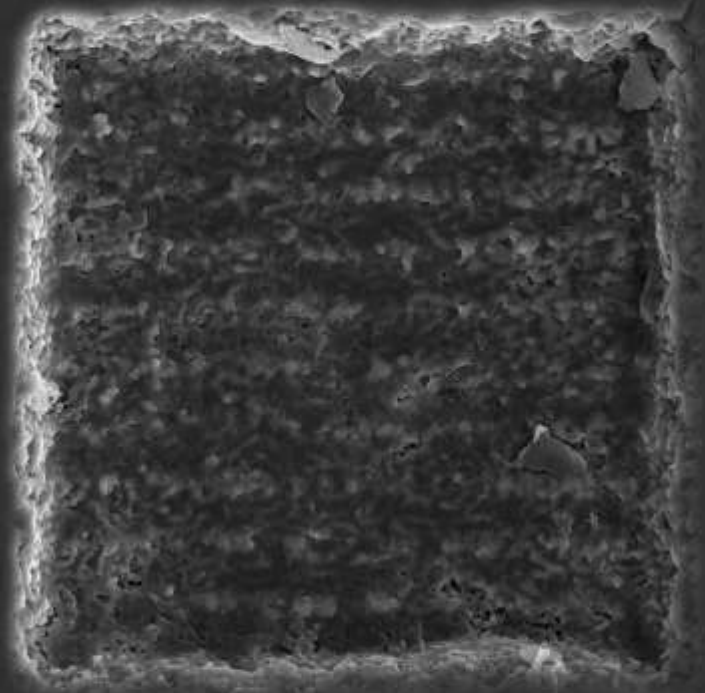

Det LD-SE HV 15kV Gear 高分辨 MAG x 2 000 SEM4000X  
WD 23.67mm HFW 64.06μm Res 3072x2048 Dwell 4μs 5μm

Det LD-SE HV 10kV Gear 高分辨 MAG x 2 000 SEM4000X  
WD 9.03mm HFW 64.06μm Res 3072x2048 Dwell 4μs 5μm

Energy: 50×50

MarkSpeed:10 W

JumpSpeed:100 W

LineInterval:1

n:11

MarkInterval:1000

Scanned area: 32 $\mu$ m

divider:10

layers:20

Model 1

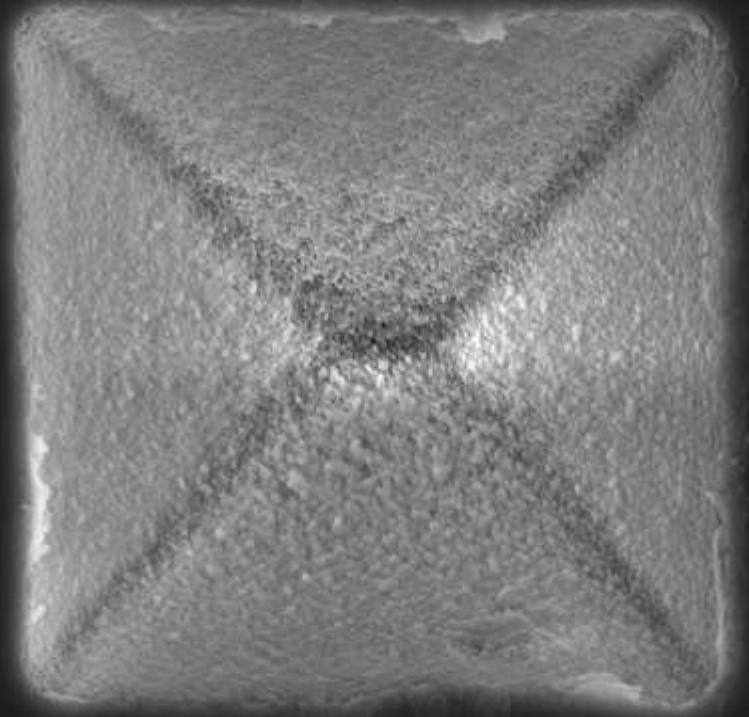

Model 4

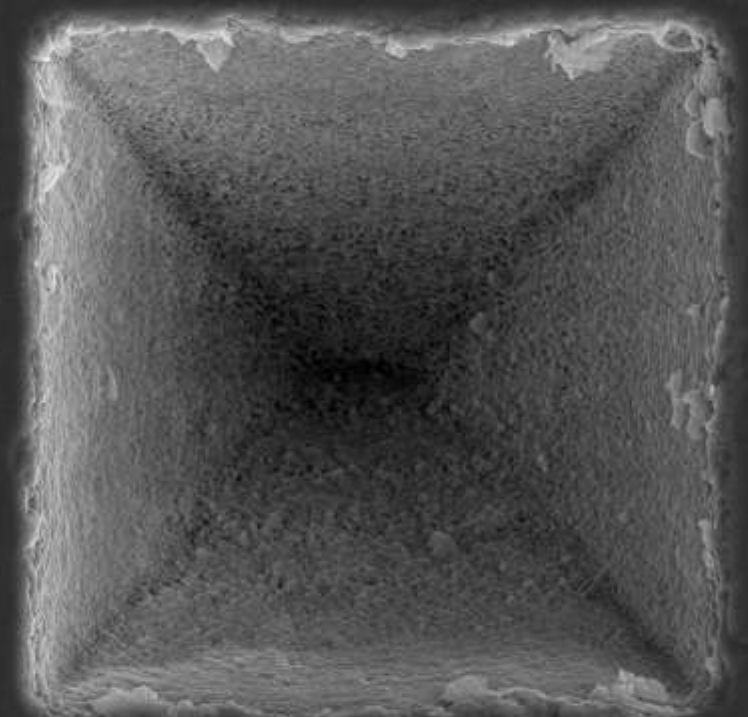

Det LD-SE HV 15kV Gear 高分辨 MAG x 2 000  
WD 23.67mm HFW 64.06 $\mu$ m Res 3072x2048 Dwell 4 $\mu$ s

SEM4000X  
5 $\mu$ m  
Det LD-SE HV 10kV Gear 高分辨 MAG x 2 000  
WD 9.03mm HFW 64.06 $\mu$ m Res 3072x2048 Dwell 4 $\mu$ s SEM4000X  
5 $\mu$ m

Energy: 50 $\times$ 50

MarkSpeed:10 W

JumpSpeed:100 W

LineInterval:1

n:11

MarkInterval:1000

Scanned area: 32 $\mu$ m

divider:10

layers:40

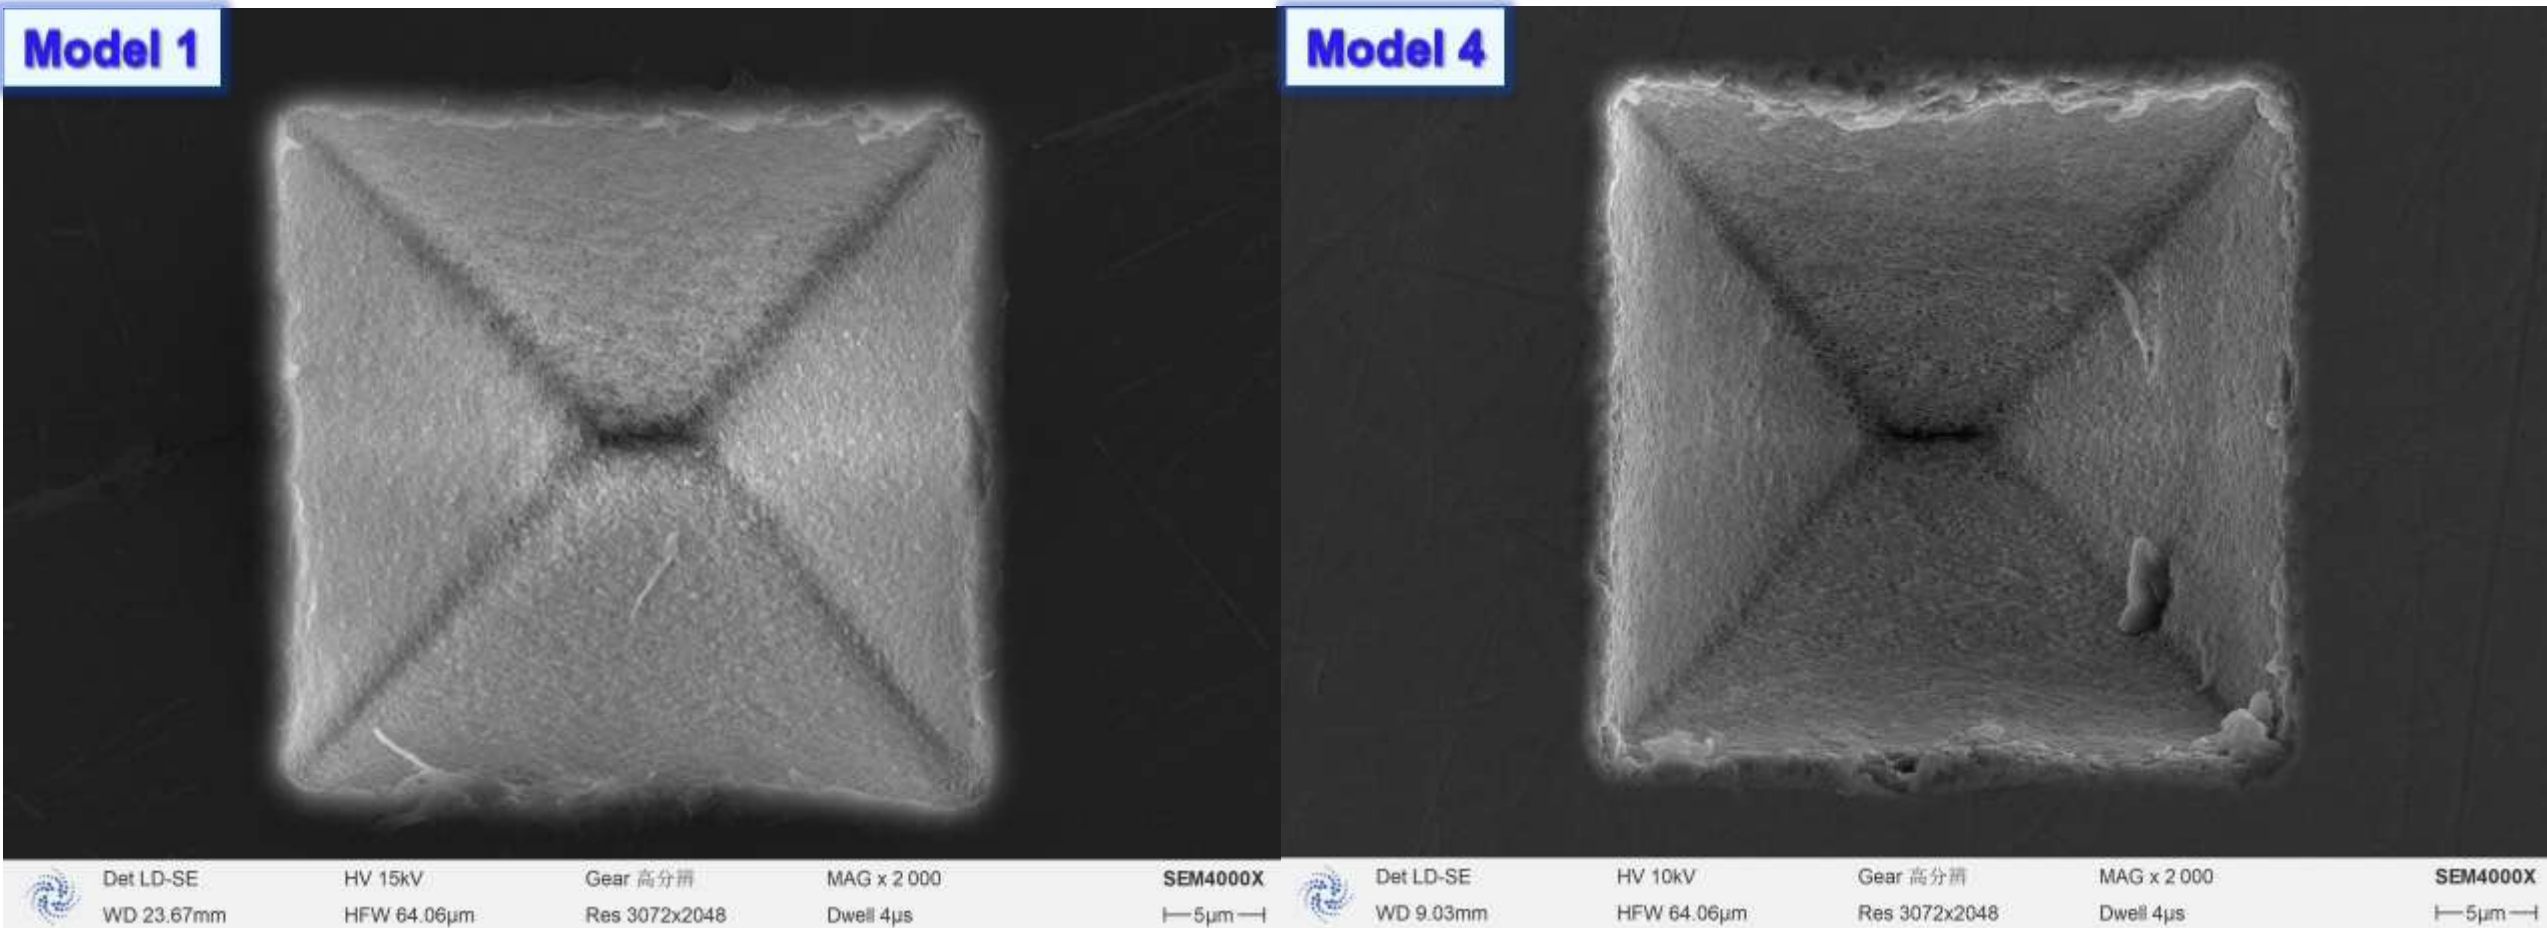

Energy: 50 $\times$ 50

MarkSpeed:10 W

JumpSpeed:100 W

LineInterval:1

n:11

MarkInterval:1000

Scanned area: 32 $\mu$ m

divider:50

layers:2

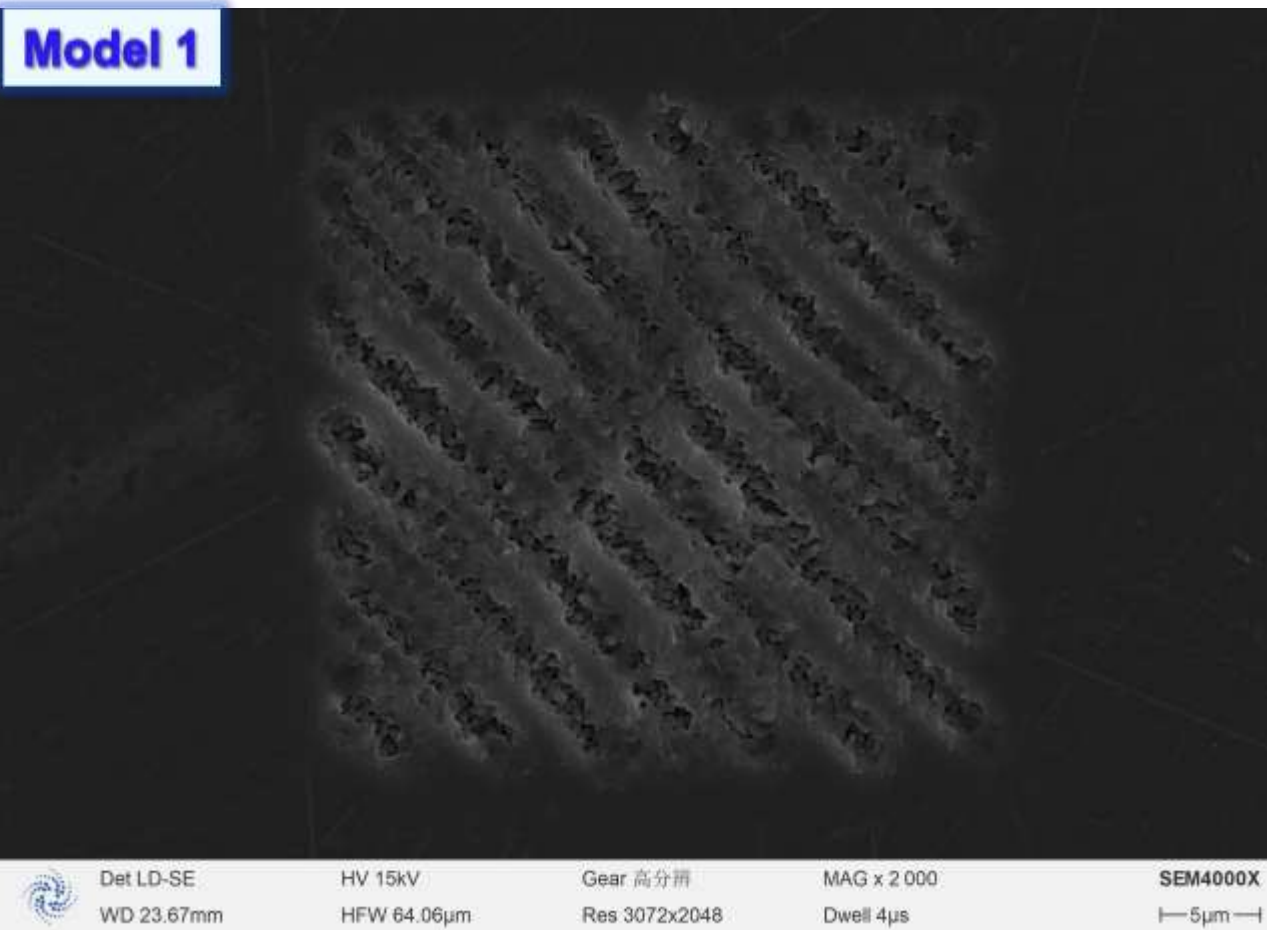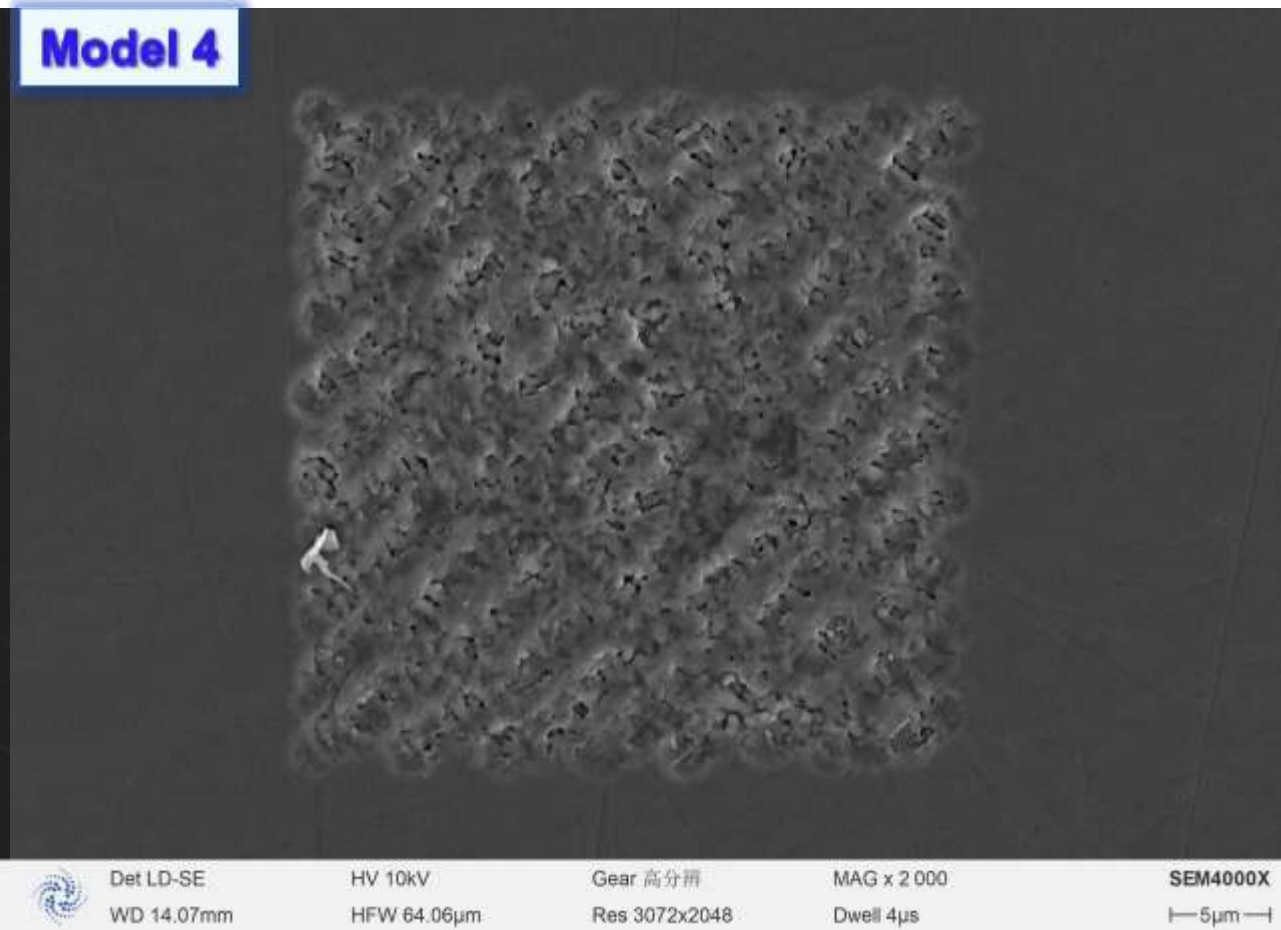

Energy: 50 $\times$ 50

MarkSpeed:10 W

JumpSpeed:100 W

LineInterval:1

n:11

MarkInterval:1000

Scanned area: 32 $\mu$ m

divider:50

layers:20

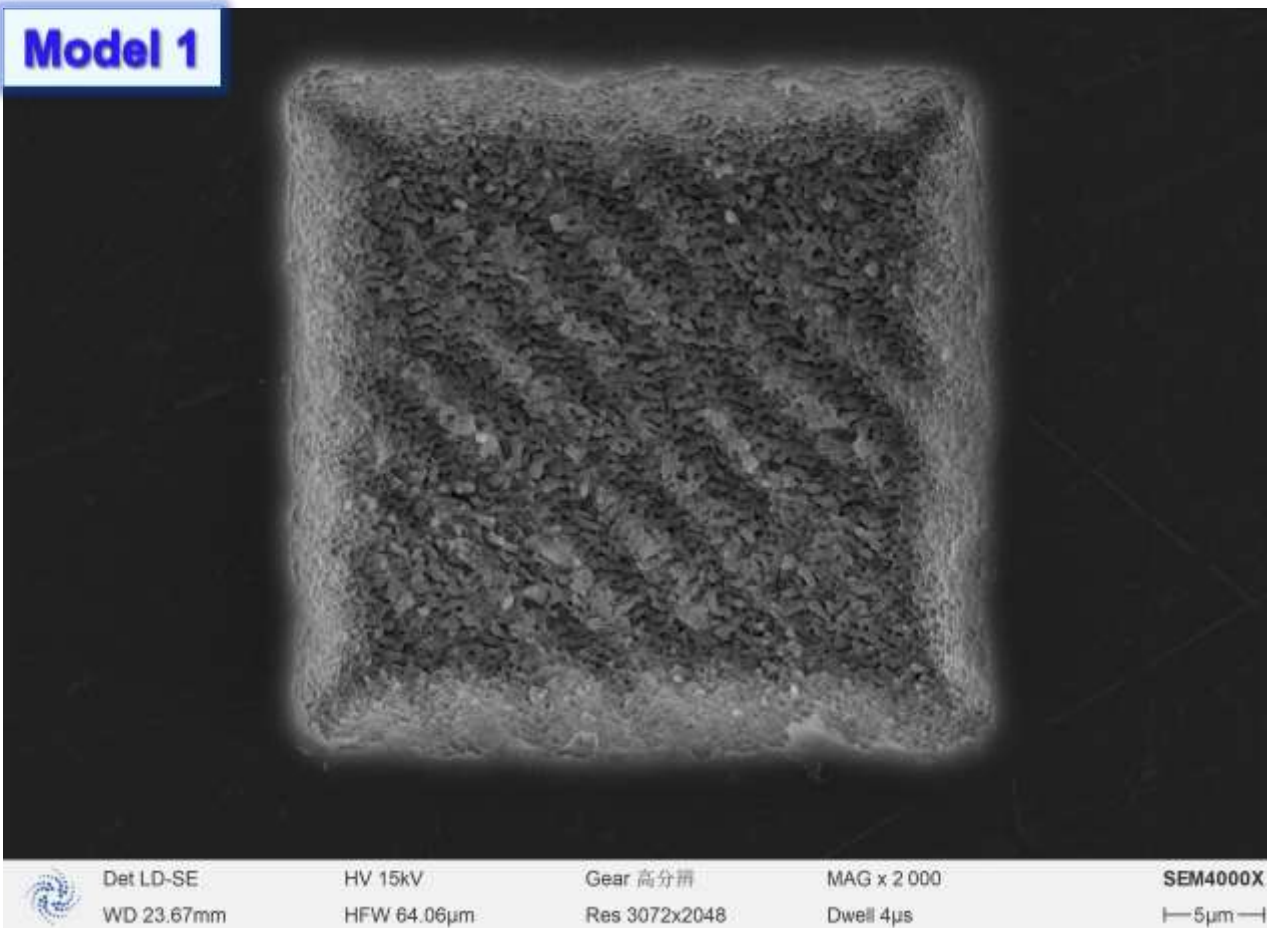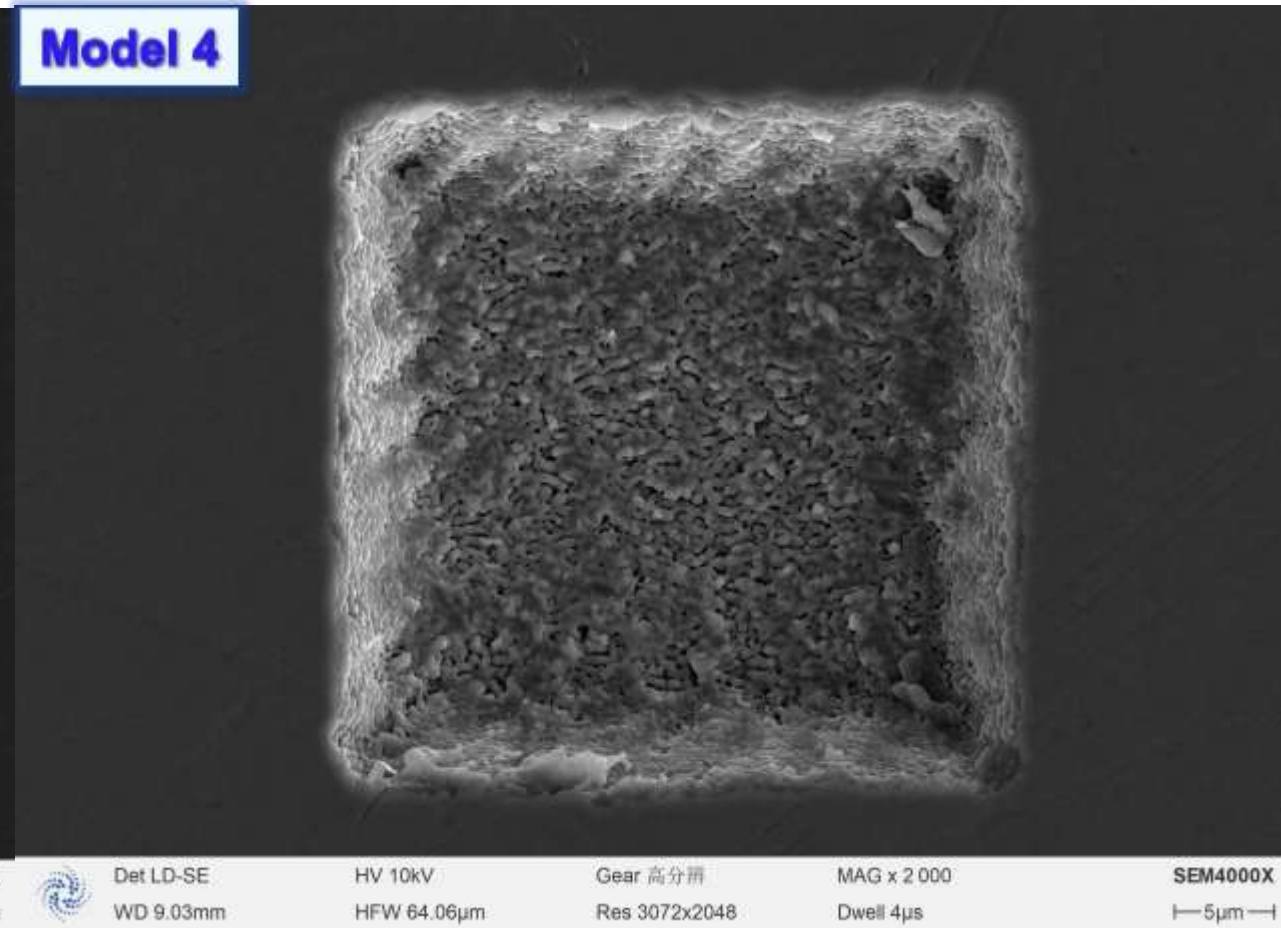

Energy: 50 $\times$ 50

MarkSpeed:10 W

JumpSpeed:100 W

LineInterval:1

n:11

MarkInterval:1000

Scanned area: 32μm

divider:50

layers:40

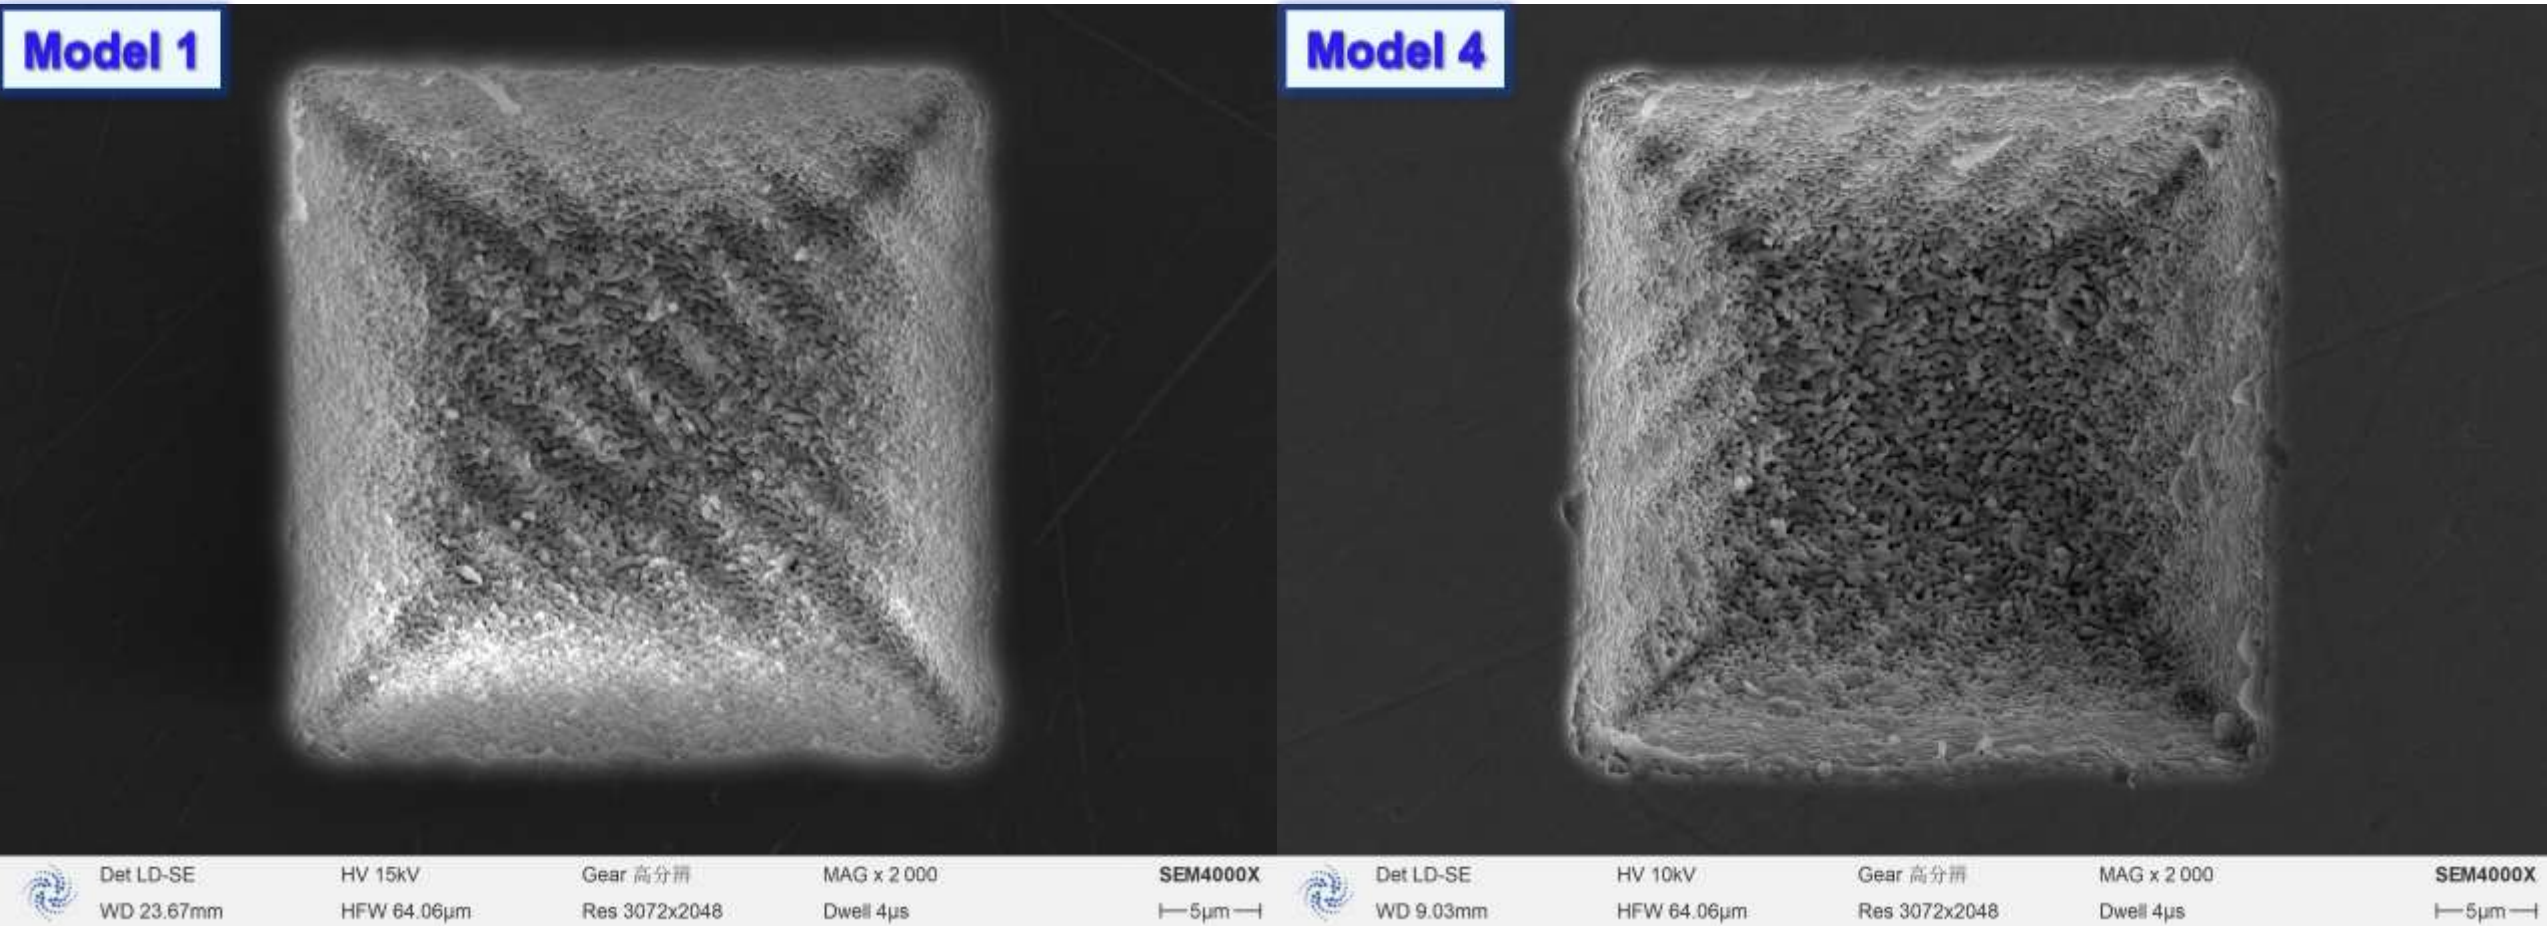

Energy: 50×50

MarkSpeed:10 W

JumpSpeed:100 W

LineInterval:1

n:11

MarkInterval:1000

Scanned area: 32 $\mu$ m

divider:150

layers:2

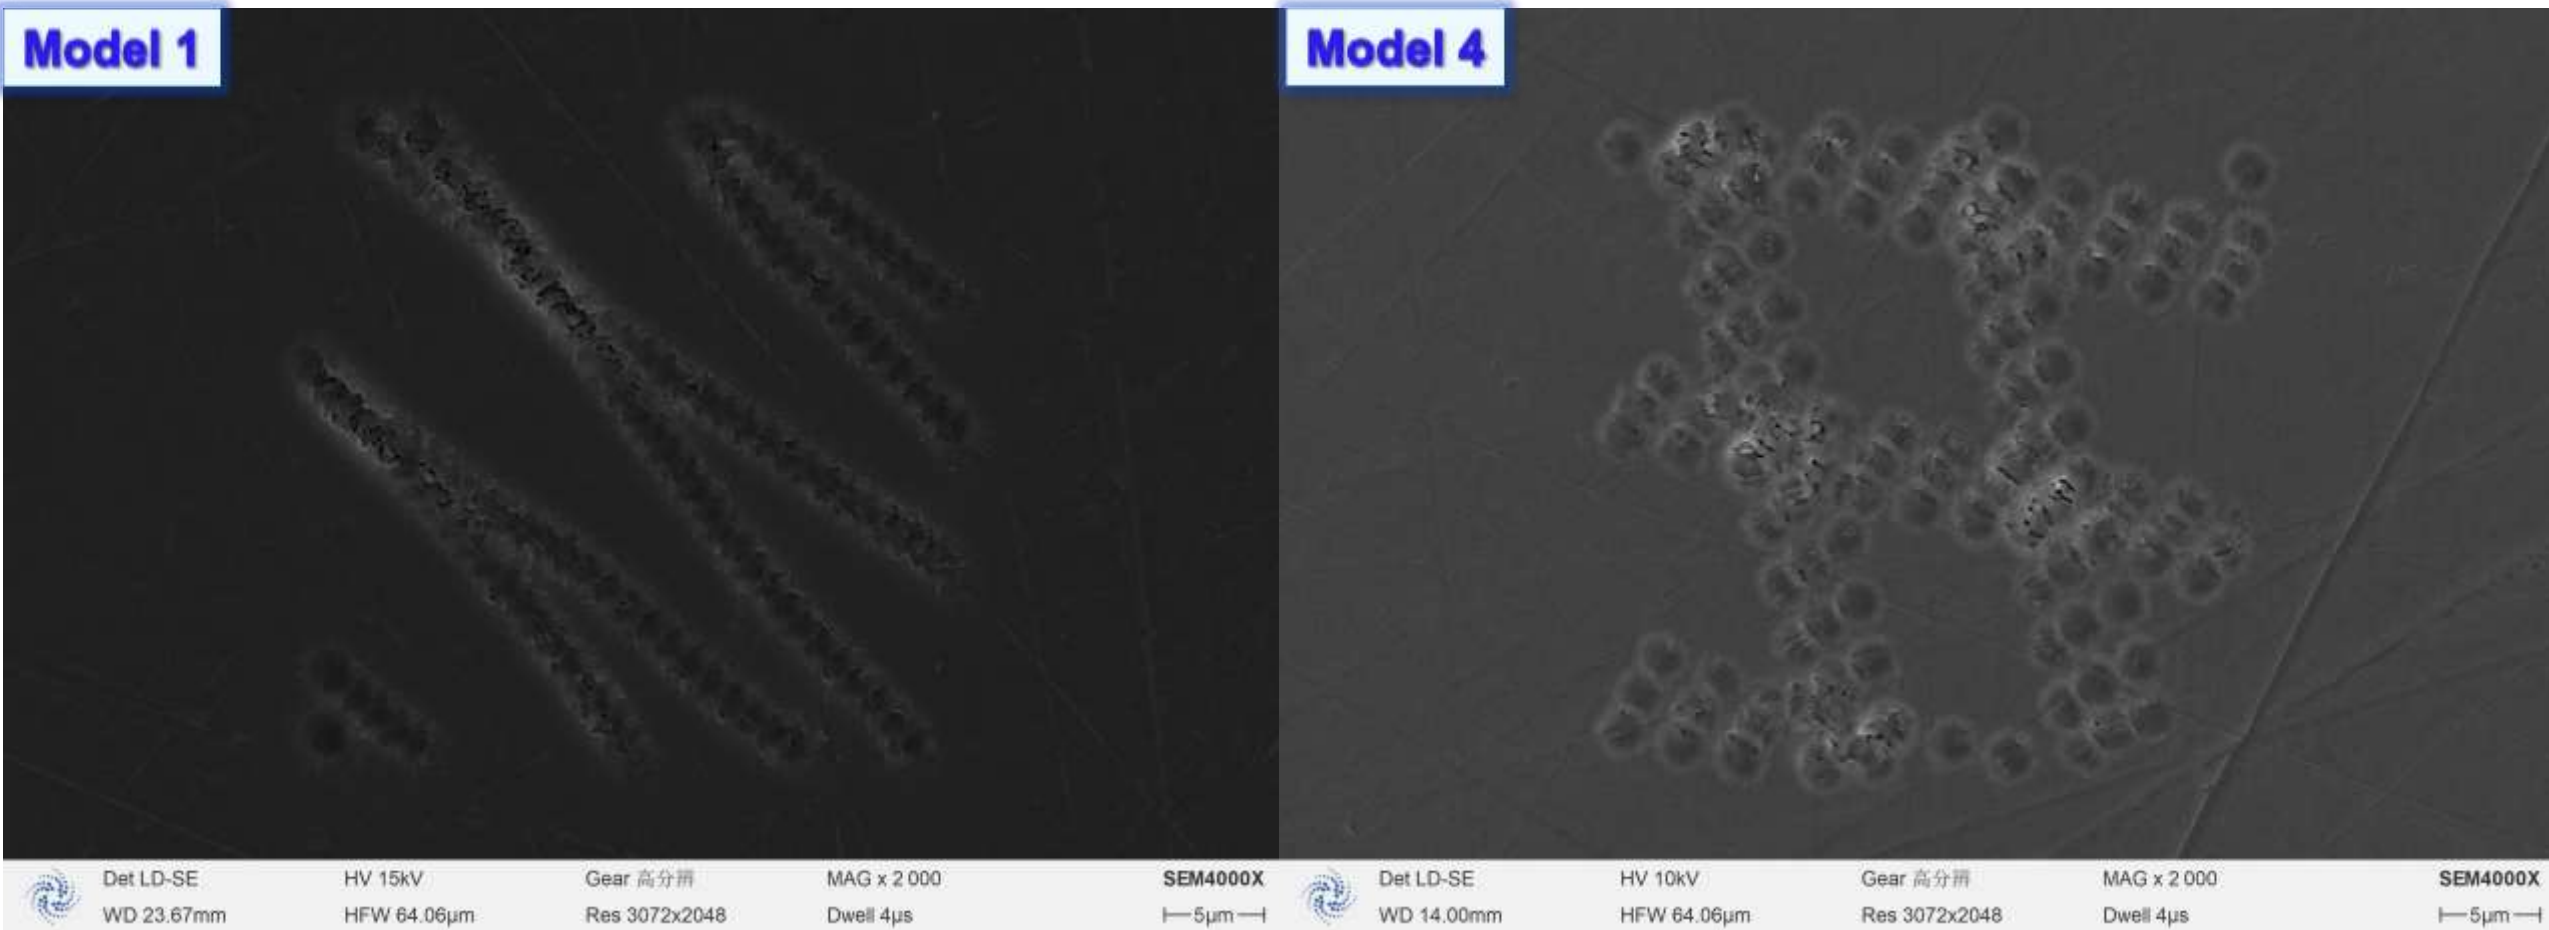

Energy: 50 $\times$ 50

MarkSpeed:10 W

JumpSpeed:100 W

LineInterval:1

n:11

MarkInterval:1000

Scanned area: 32μm

divider:150

layers:20

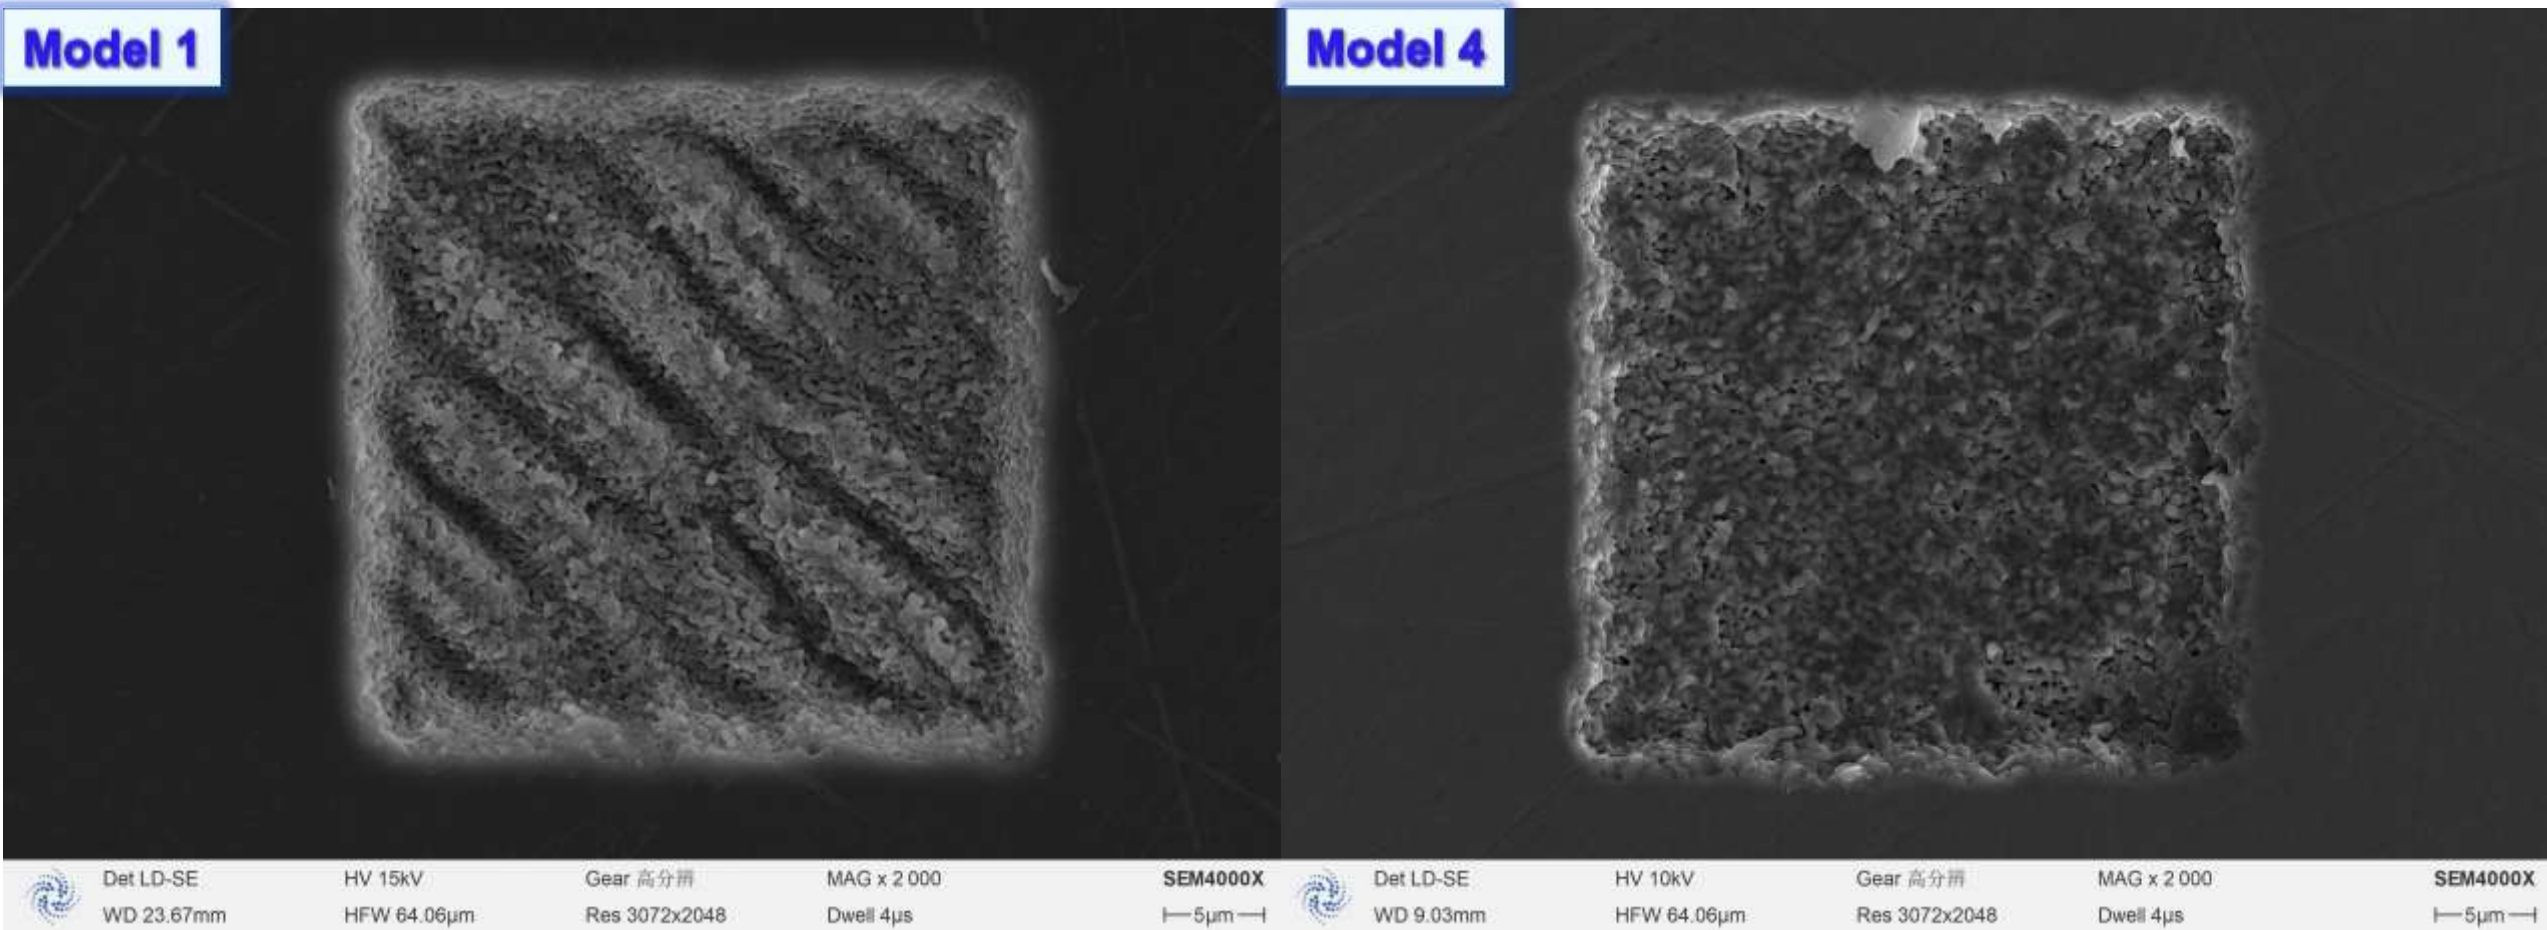

Energy: 50×50

MarkSpeed:10 W

JumpSpeed:100 W

LineInterval:1

n:11

MarkInterval:1000

Scanned area: 32 $\mu$ m

divider:150

layers:40

Model 1

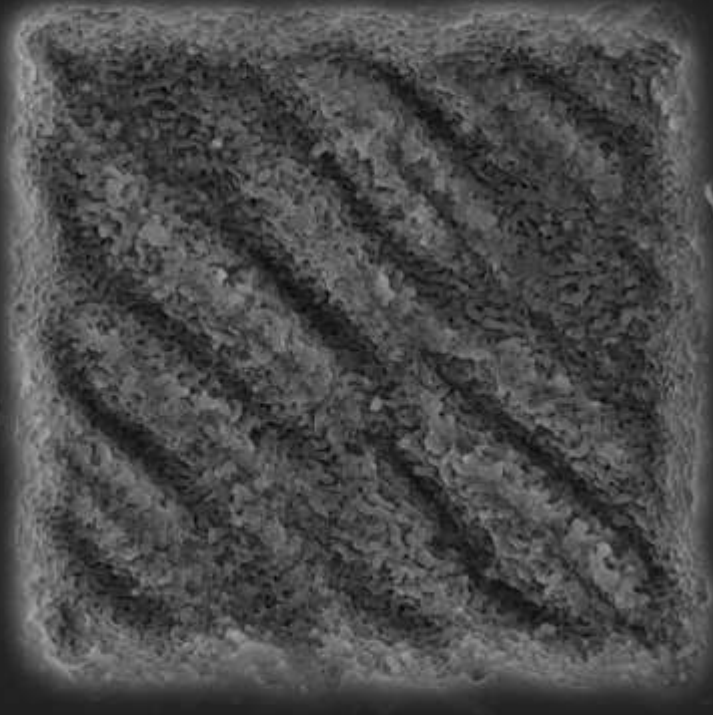

Model 4

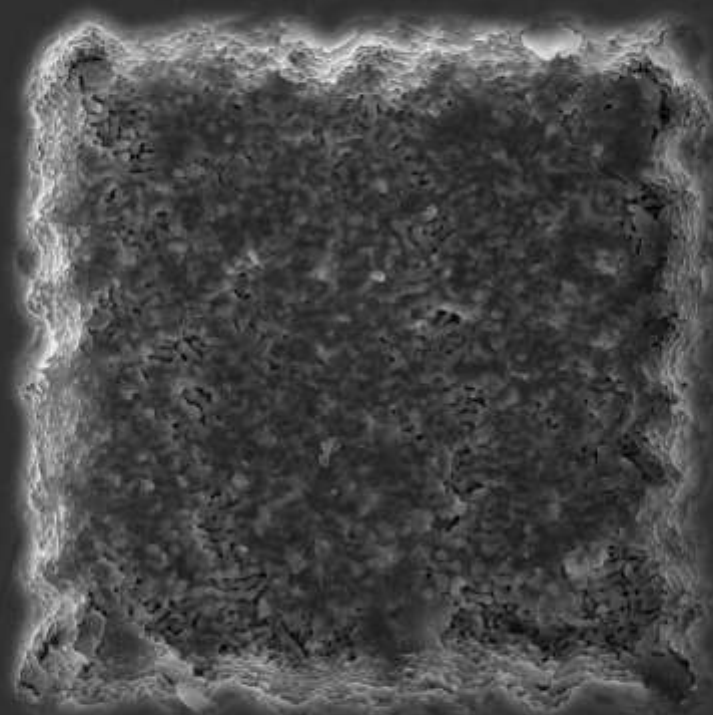

Det LD-SE HV 15kV Gear 高分辨 MAG x 2 000  
WD 23.67mm HFW 64.06 $\mu$ m Res 3072x2048 Dwell 4 $\mu$ s

SEM4000X 5 $\mu$ m  
Det LD-SE HV 10kV Gear 高分辨 MAG x 2 000  
WD 9.03mm HFW 64.06 $\mu$ m Res 3072x2048 Dwell 4 $\mu$ s SEM4000X 5 $\mu$ m

Energy: 50 $\times$ 50

MarkSpeed:10 W

JumpSpeed:100 W

LineInterval:1

n:11

MarkInterval:1000

Scanned area: 44μm

divider:10

layers:2

Model 1

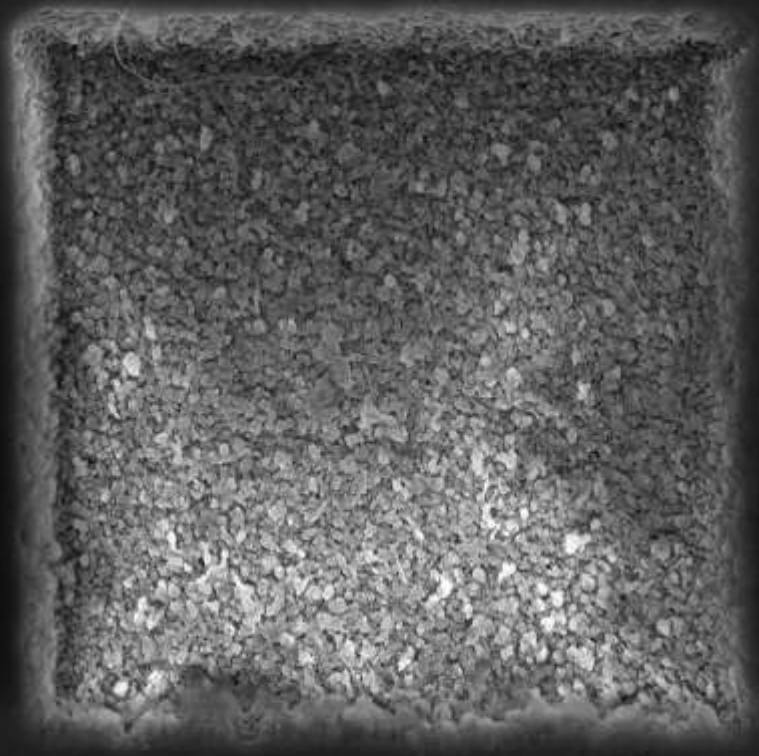

Model 4

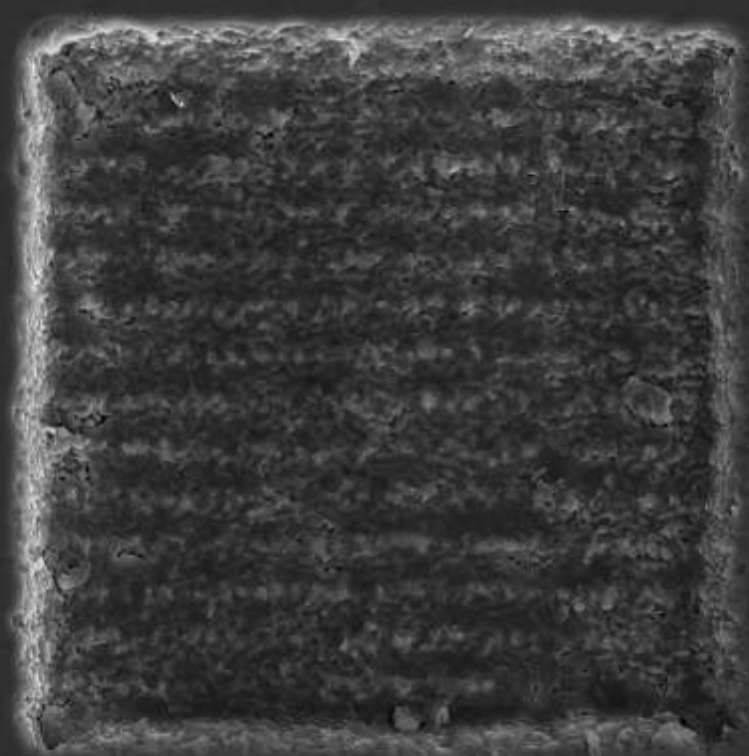

Det LD-SE HV 15kV Gear 高分辨 MAG x 1600 SEM4000X  
WD 23.67mm HFW 80.06μm Res 3072x2048 Dwell 4μs

Det LD-SE HV 10kV Gear 高分辨 MAG x 1600 SEM4000X  
WD 9.02mm HFW 80.06μm Res 3072x2048 Dwell 4μs

Energy: 50×50

MarkSpeed:10 W

JumpSpeed:100 W

LineInterval:1

n:15

MarkInterval:1000

Scanned area: 44μm

divider:10

layers:20

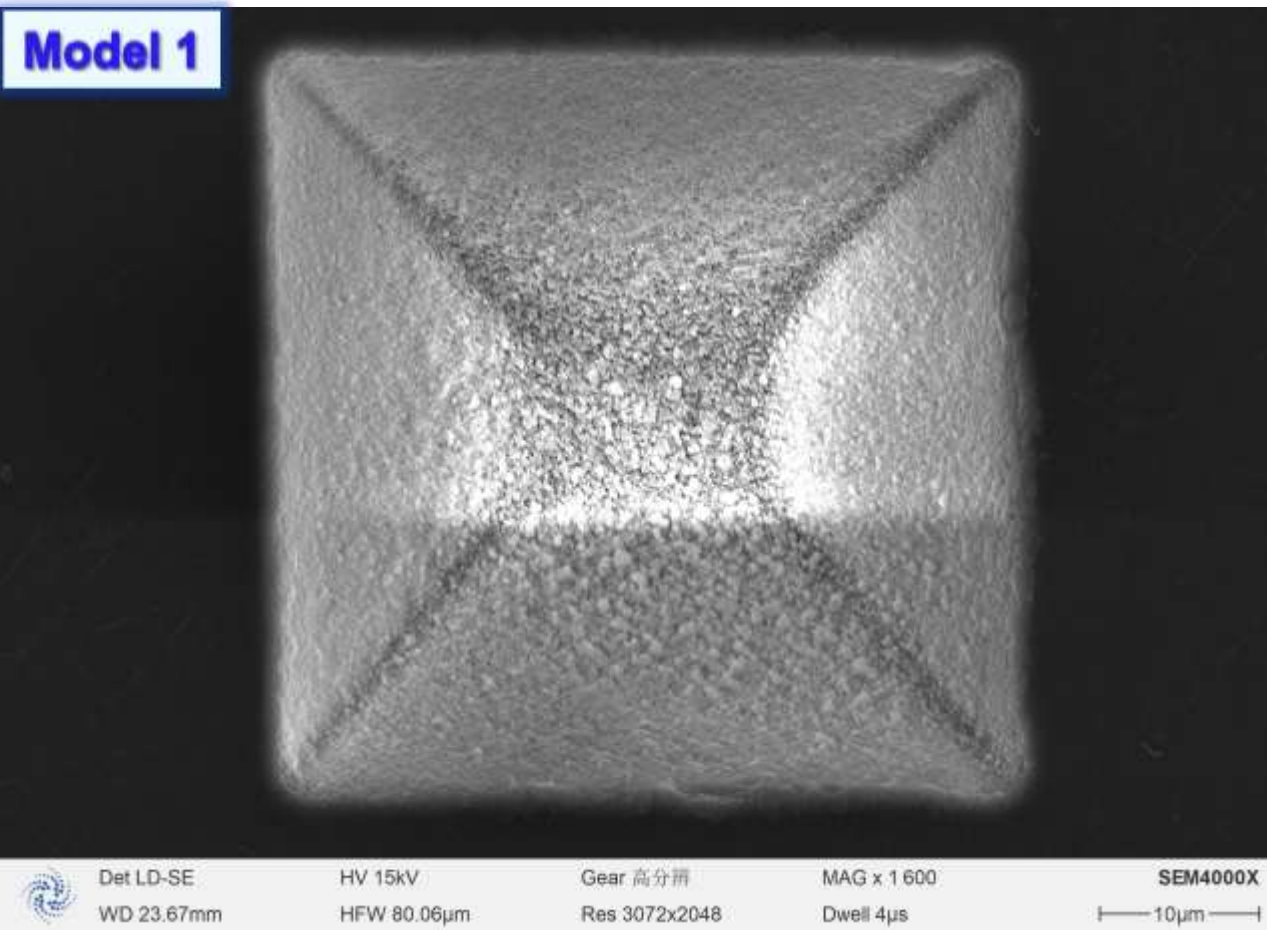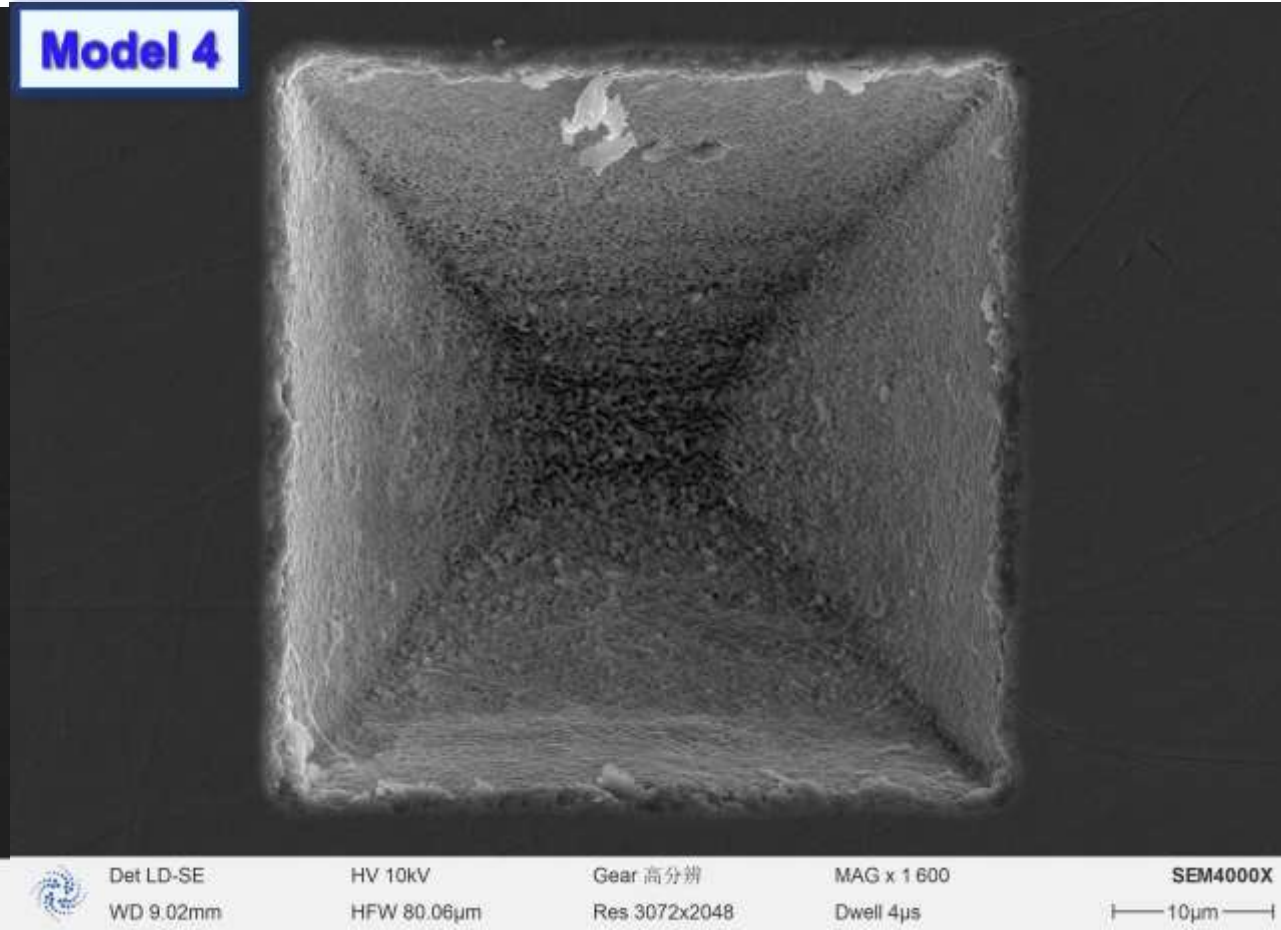

Energy: 50×50

MarkSpeed:10 W

JumpSpeed:100 W

LineInterval:1

n:15

MarkInterval:1000

Scanned area: 44μm

divider:10

layers:40

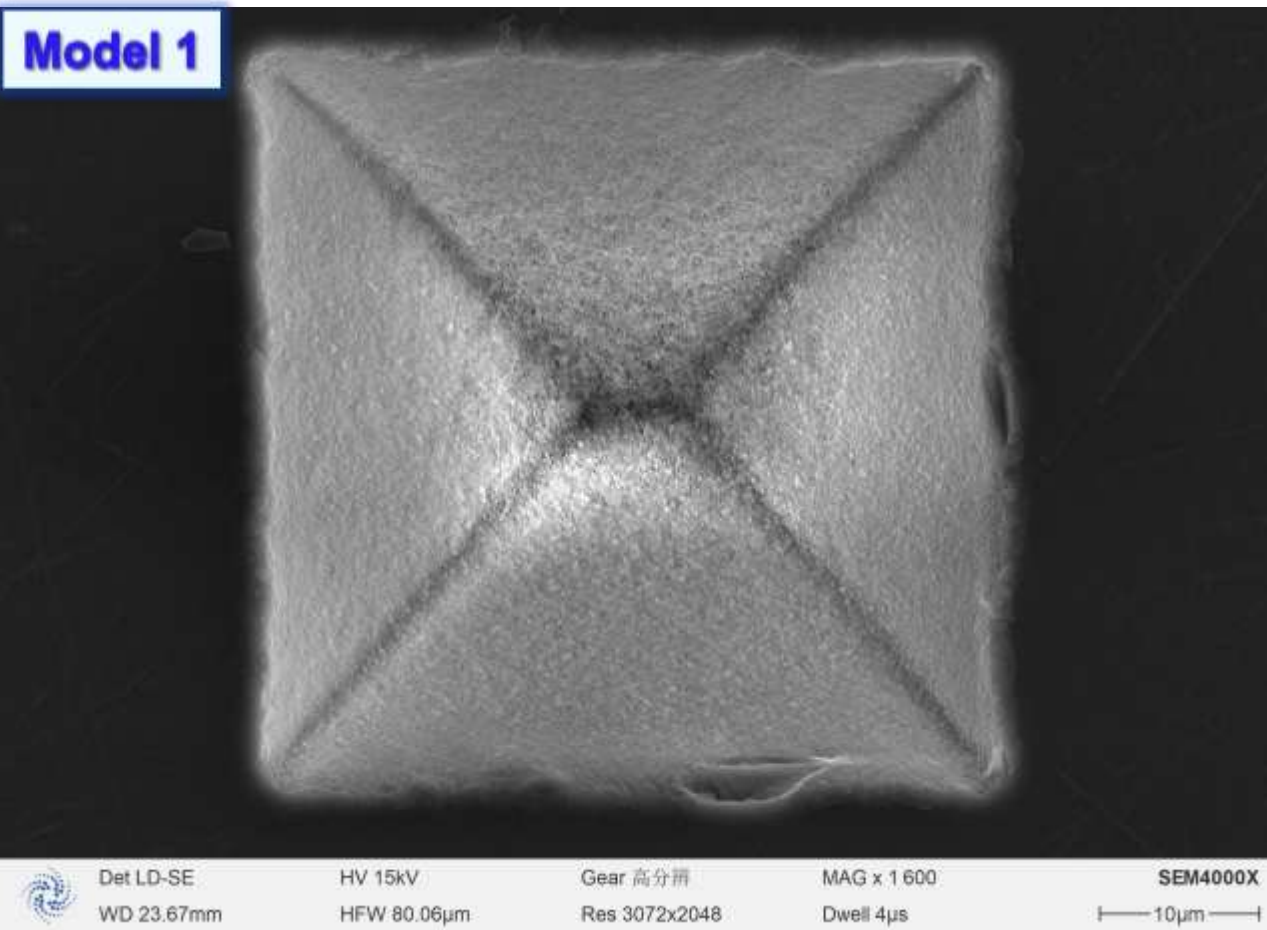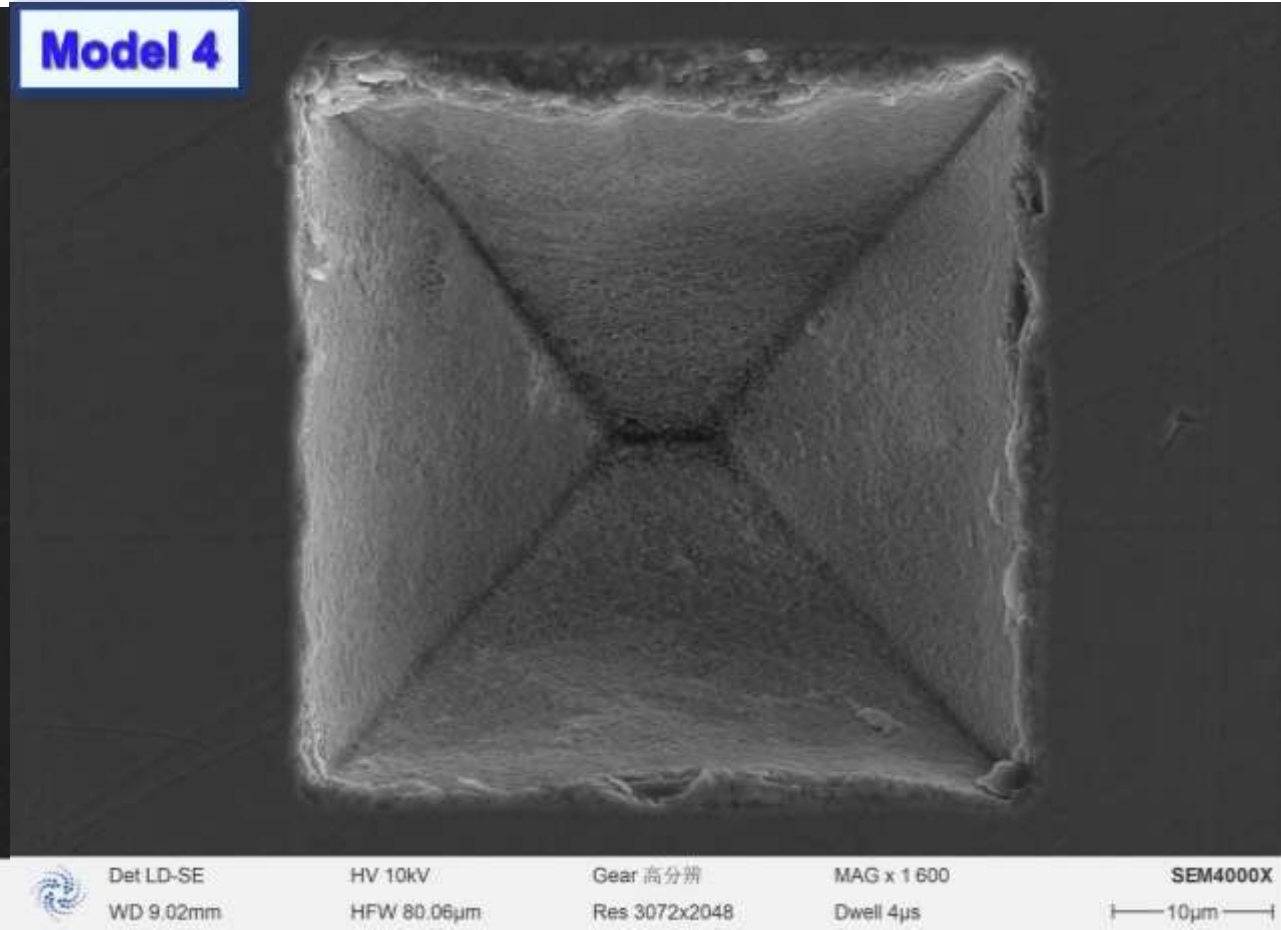

Energy: 50×50

MarkSpeed:10 W

JumpSpeed:100 W

LineInterval:1

n:15

MarkInterval:1000

Scanned area: 44μm

divider:50

layers:2

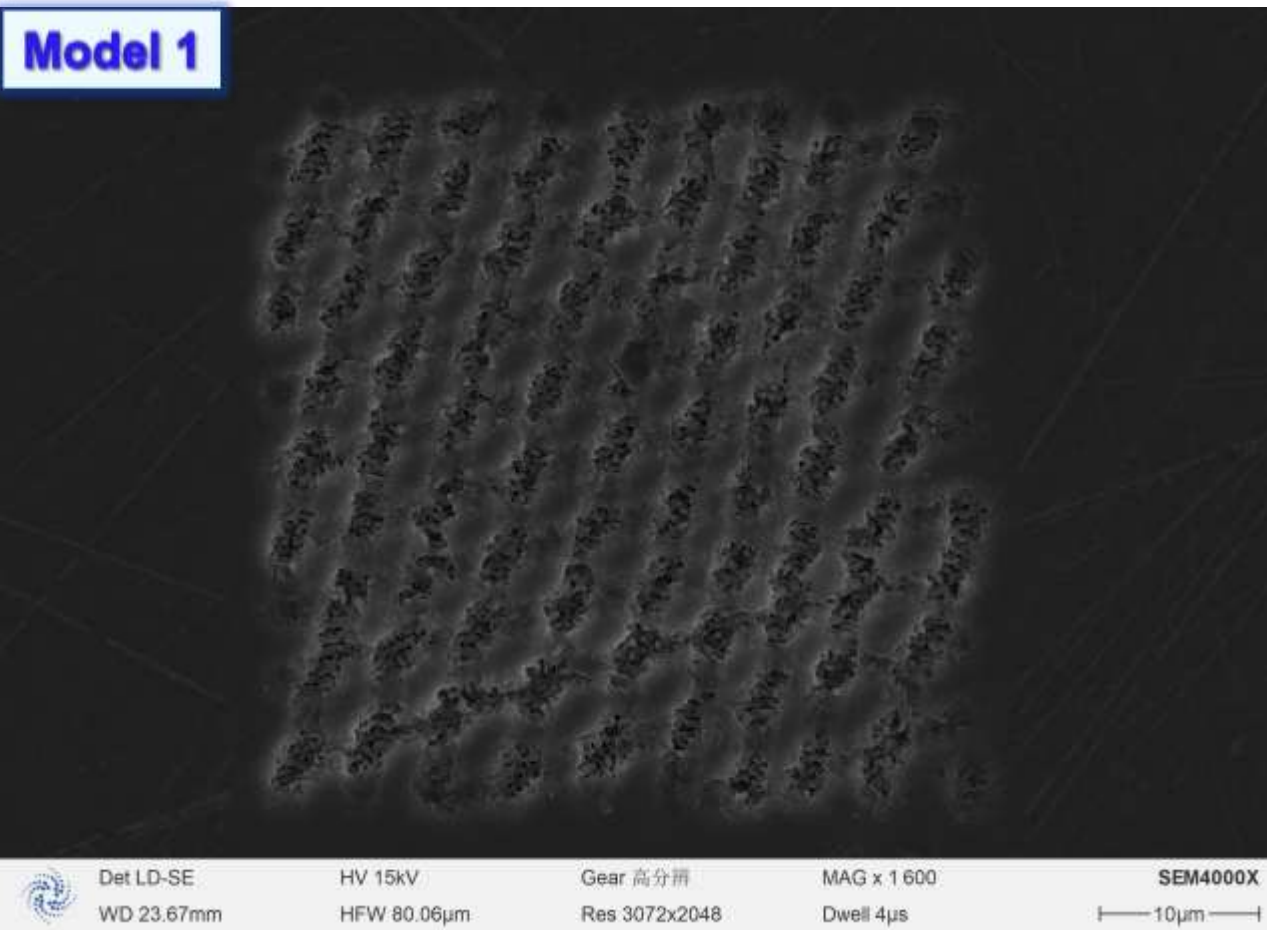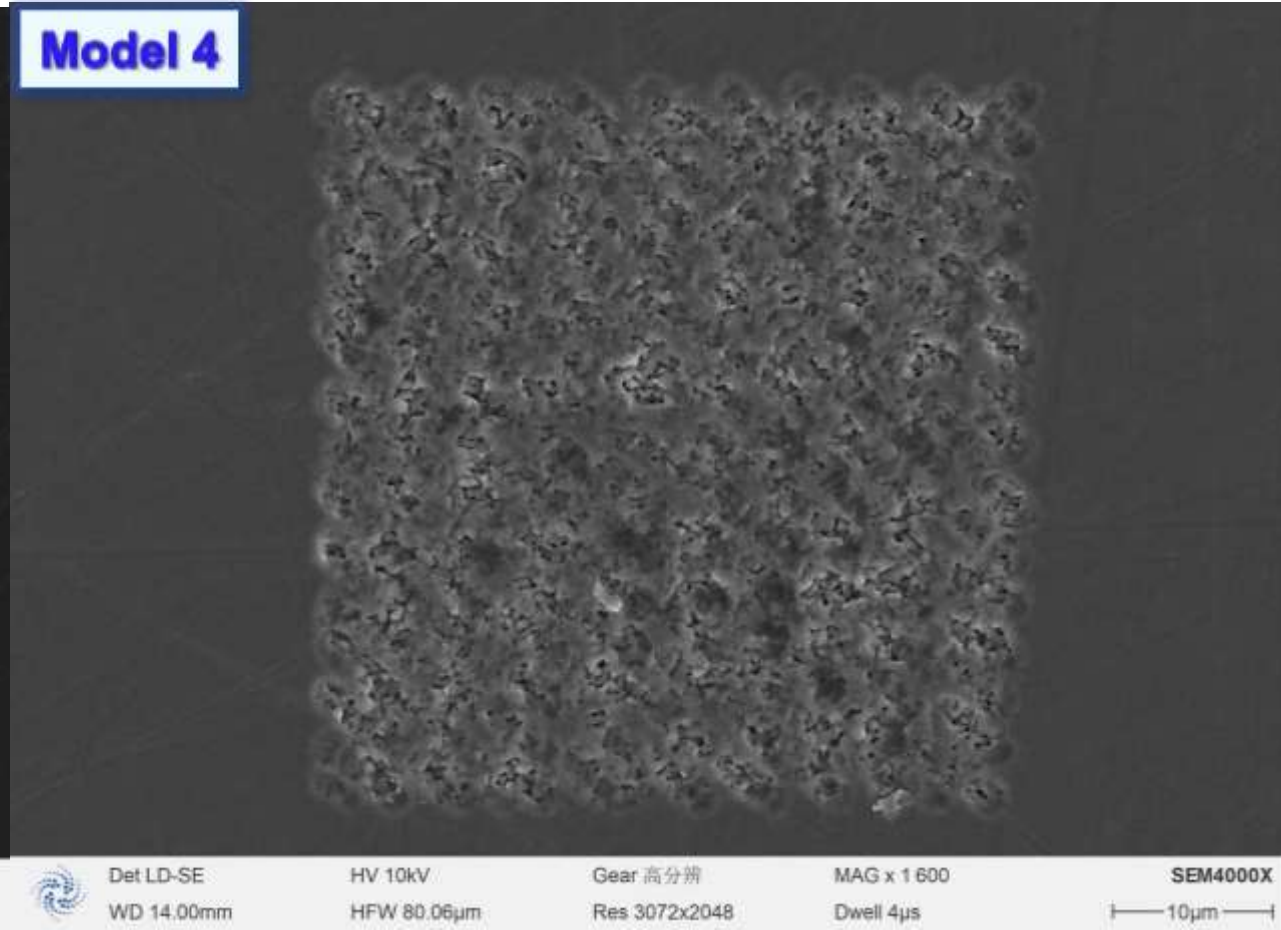

Energy: 50×50

MarkSpeed:10 W

JumpSpeed:100 W

LineInterval:1

n:15

MarkInterval:1000

Scanned area: 44μm

divider:50

layers:20

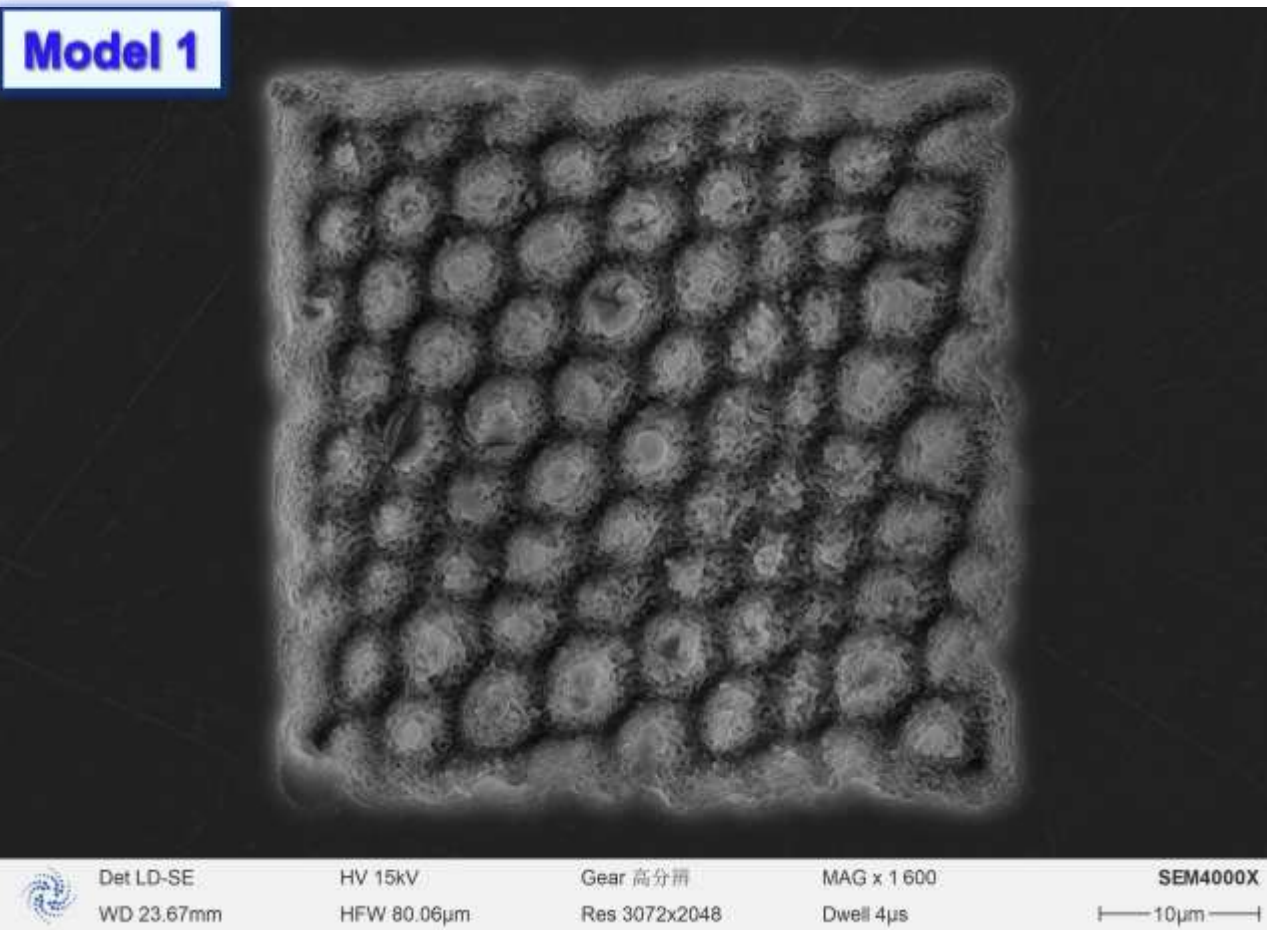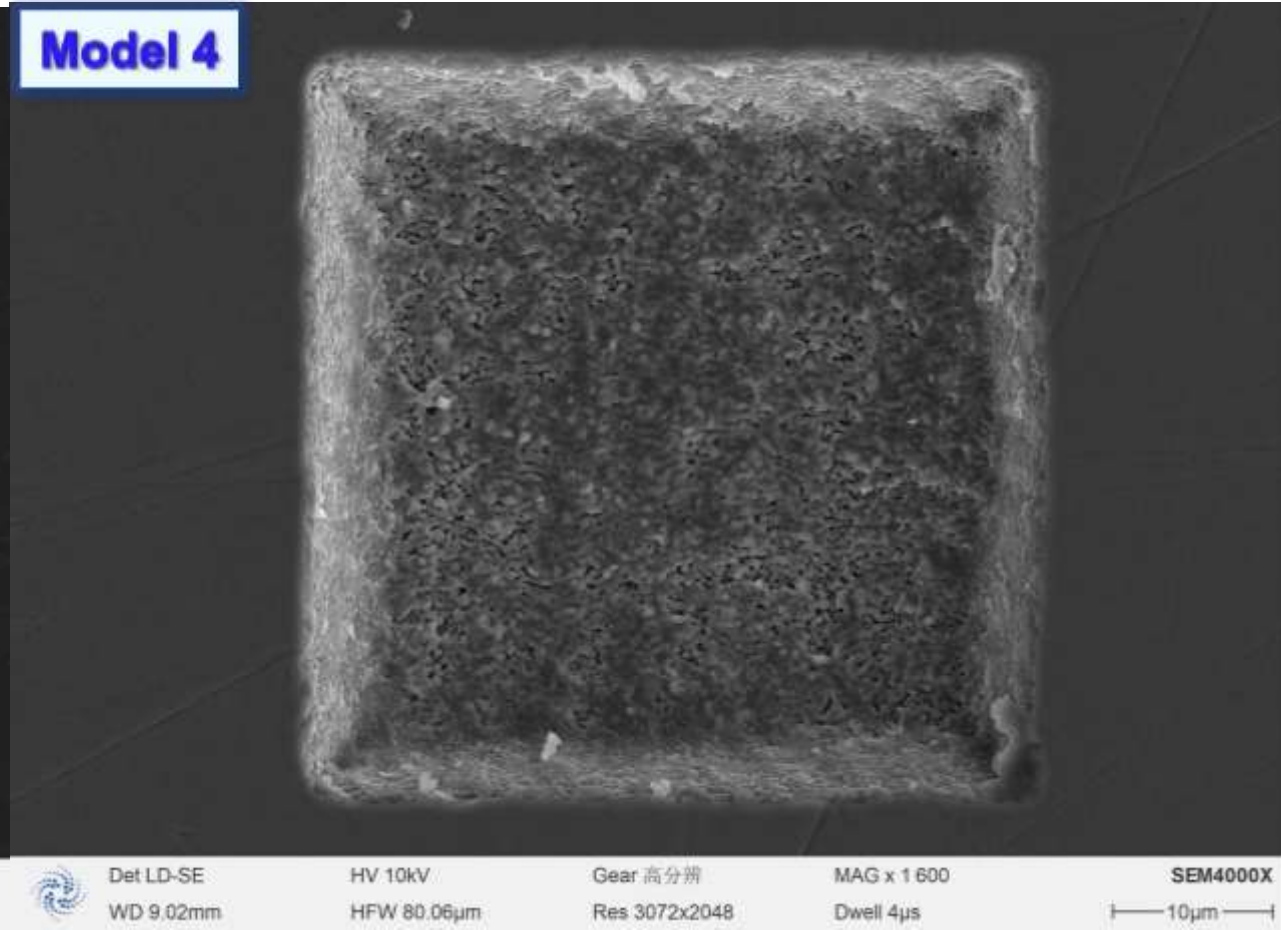

Energy: 50×50

MarkSpeed:10 W

JumpSpeed:100 W

LineInterval:1

n:15

MarkInterval:1000

Scanned area: 44μm

divider:50

layers:40

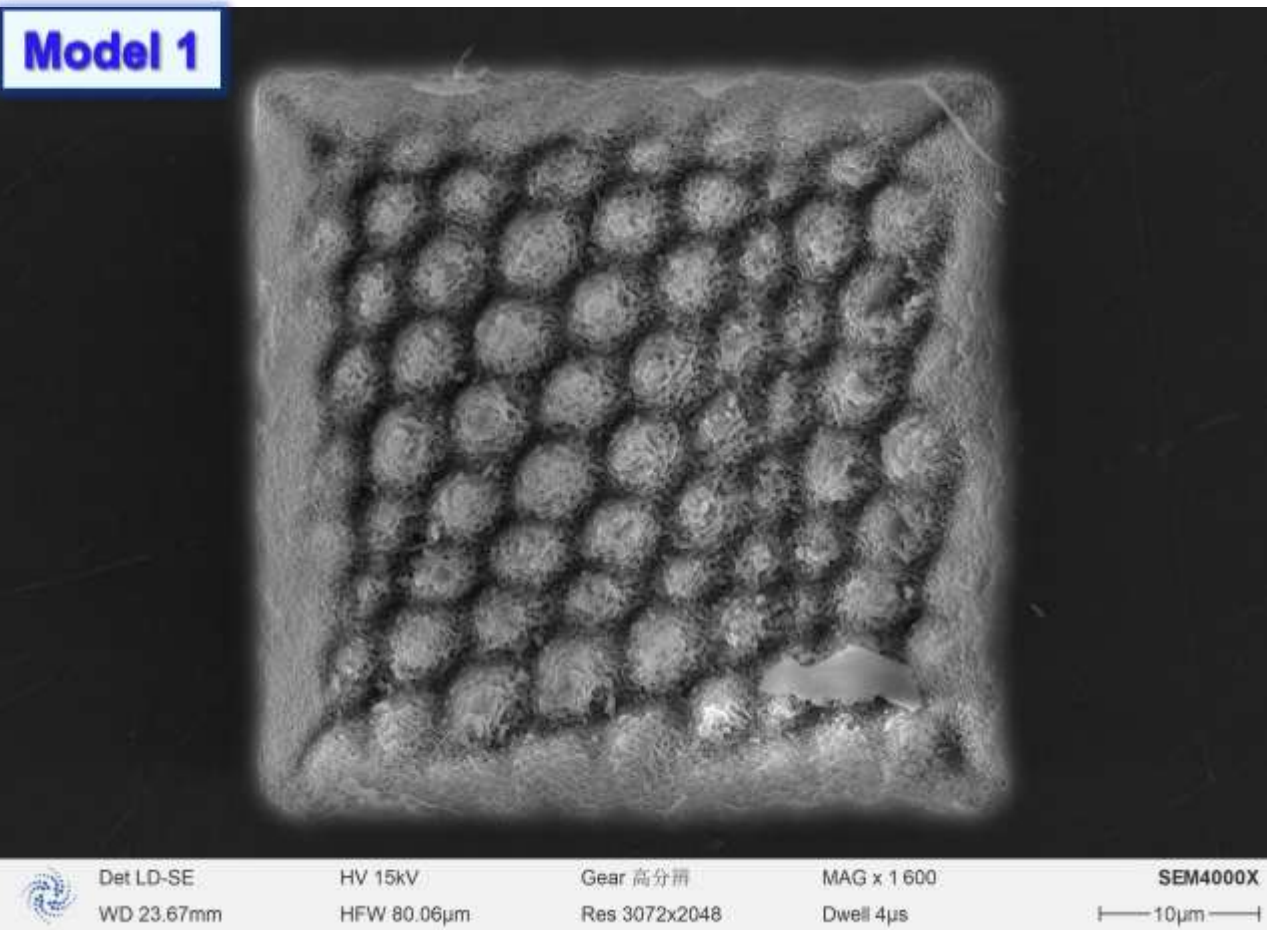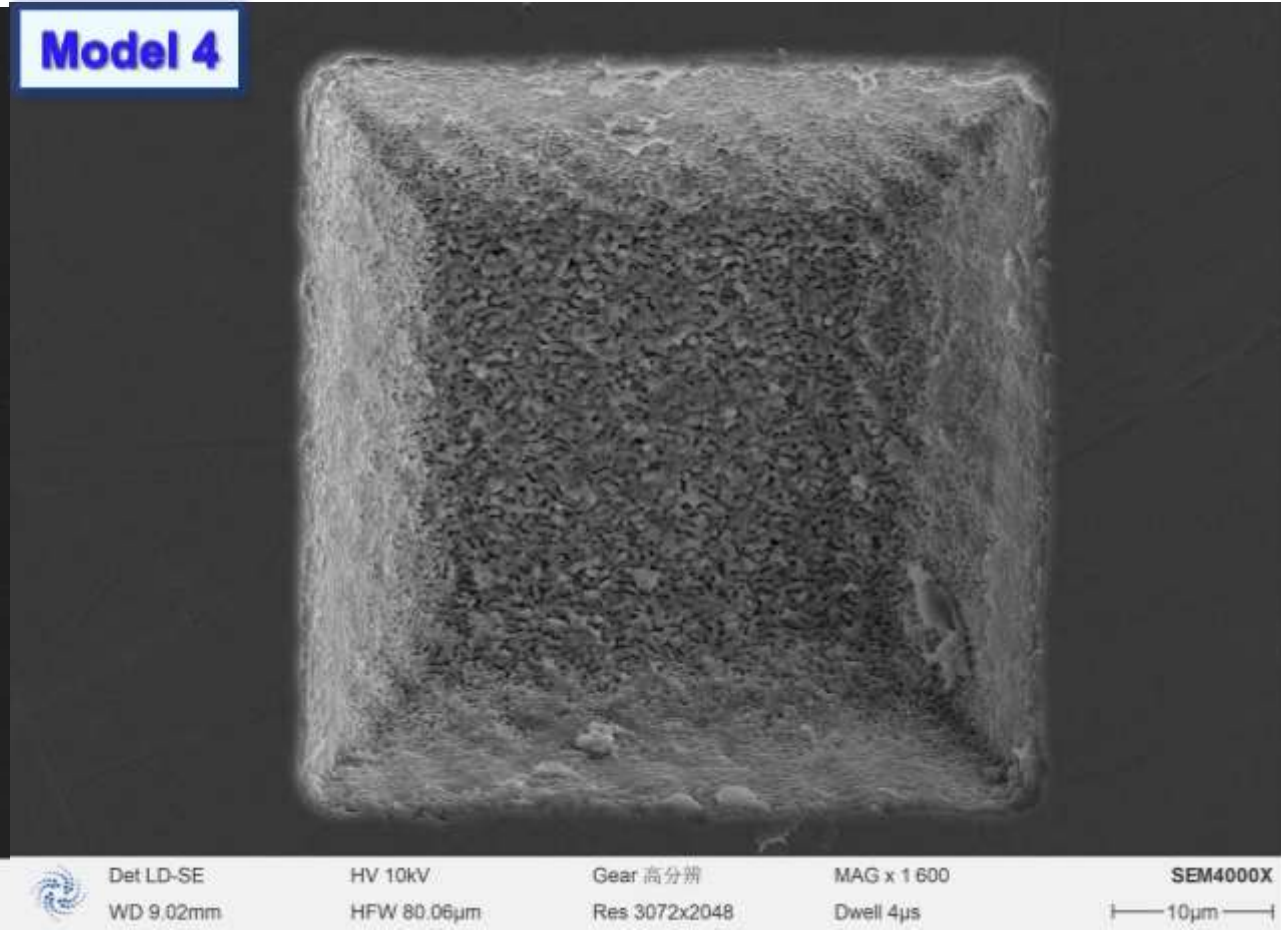

Energy: 50×50

MarkSpeed:10 W

JumpSpeed:100 W

LineInterval:1

n:15

MarkInterval:1000

Scanned area: 44μm

divider:150

layers:2

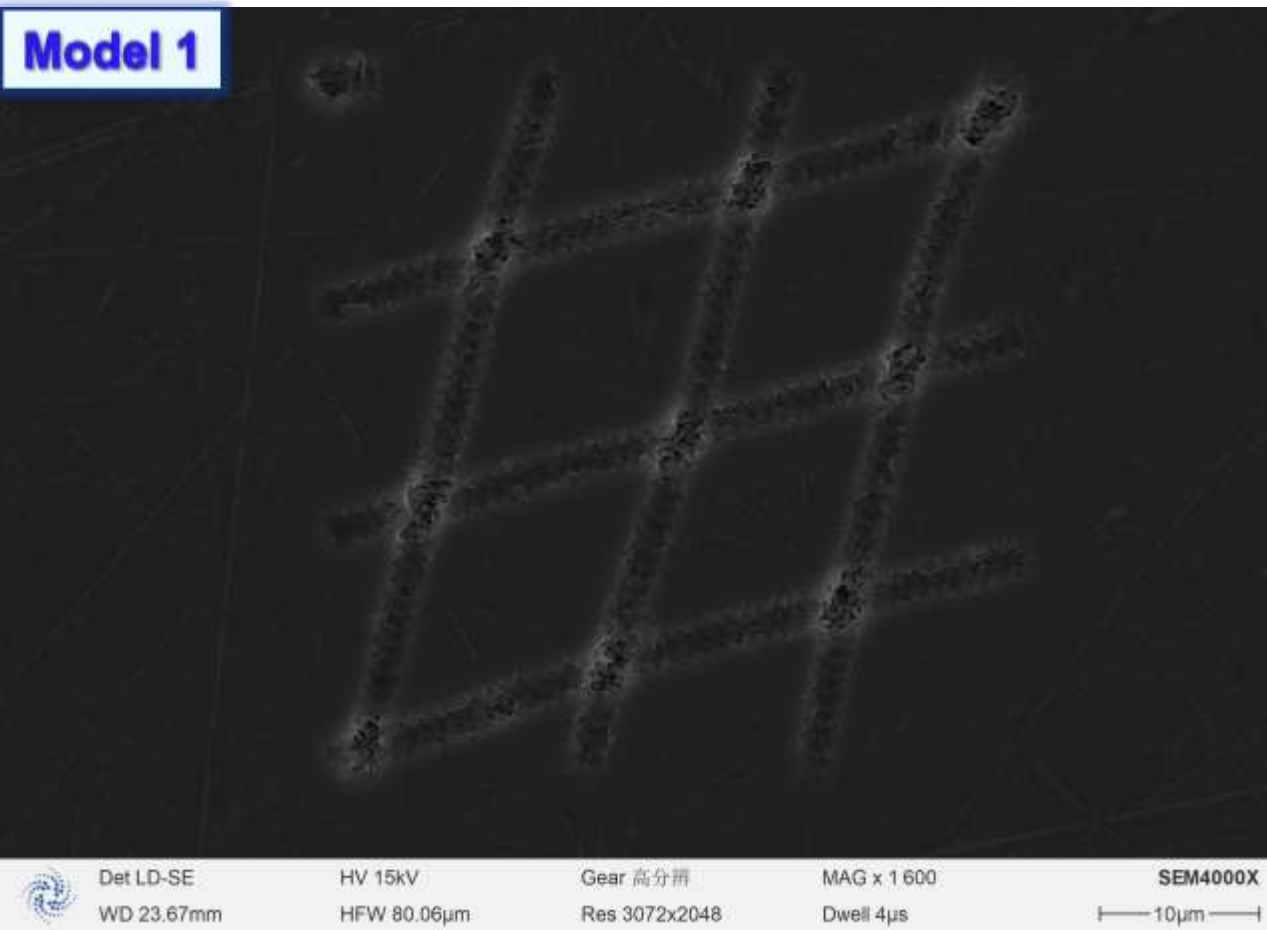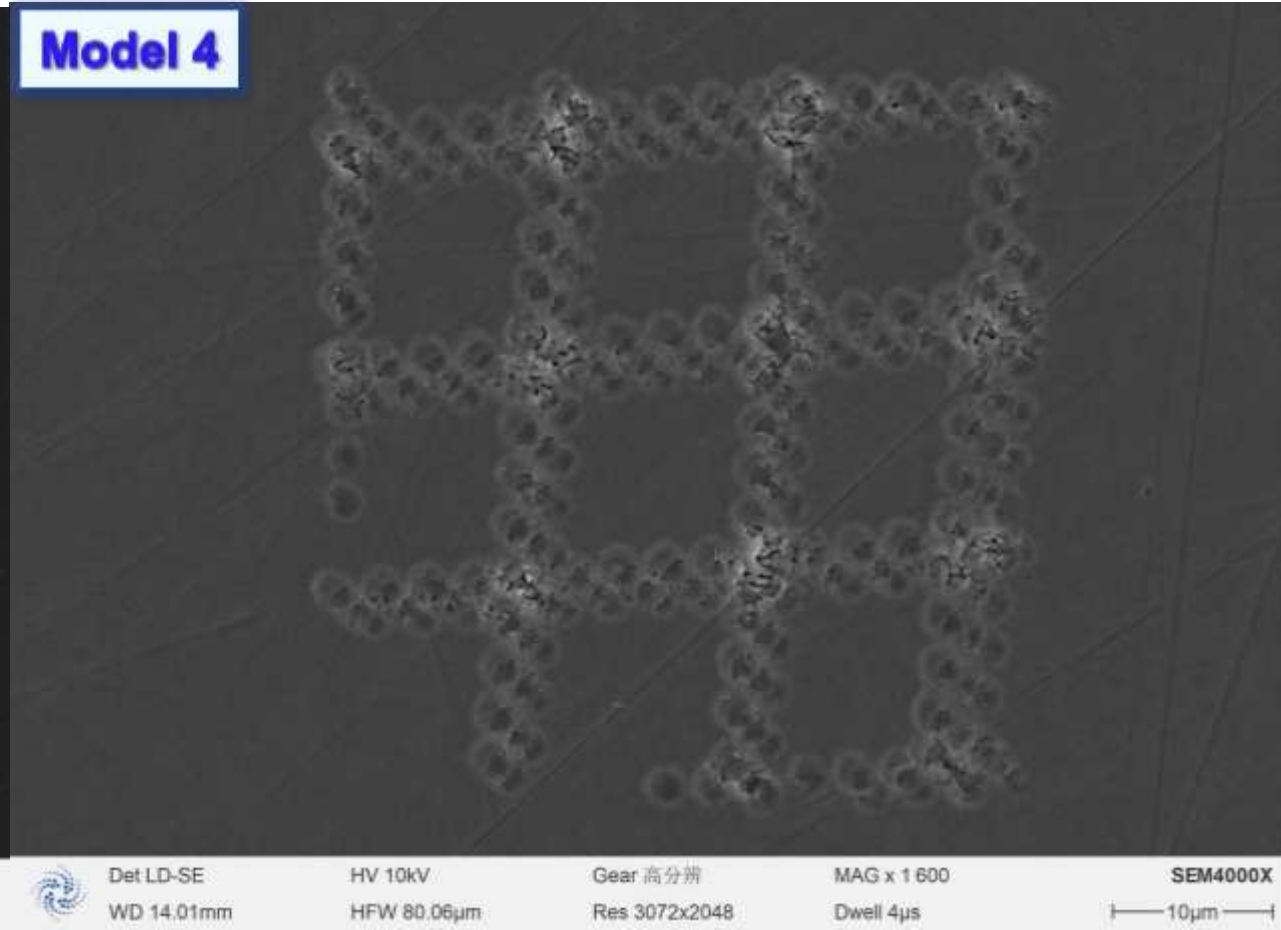

Energy: 50×50

MarkSpeed:10 W

JumpSpeed:100 W

LineInterval:1

n:15

MarkInterval:1000

Scanned area: 44μm

divider:150

layers:20

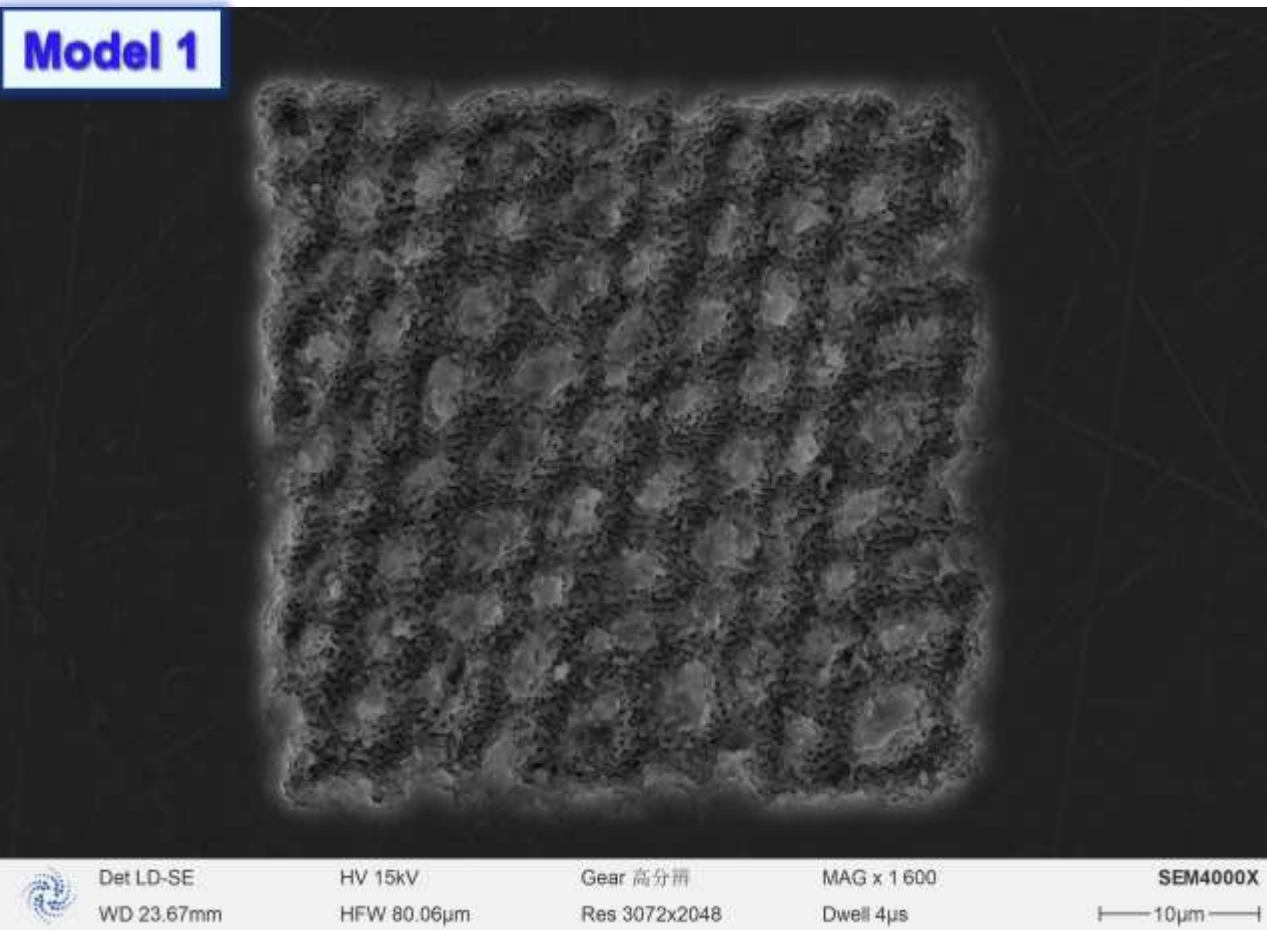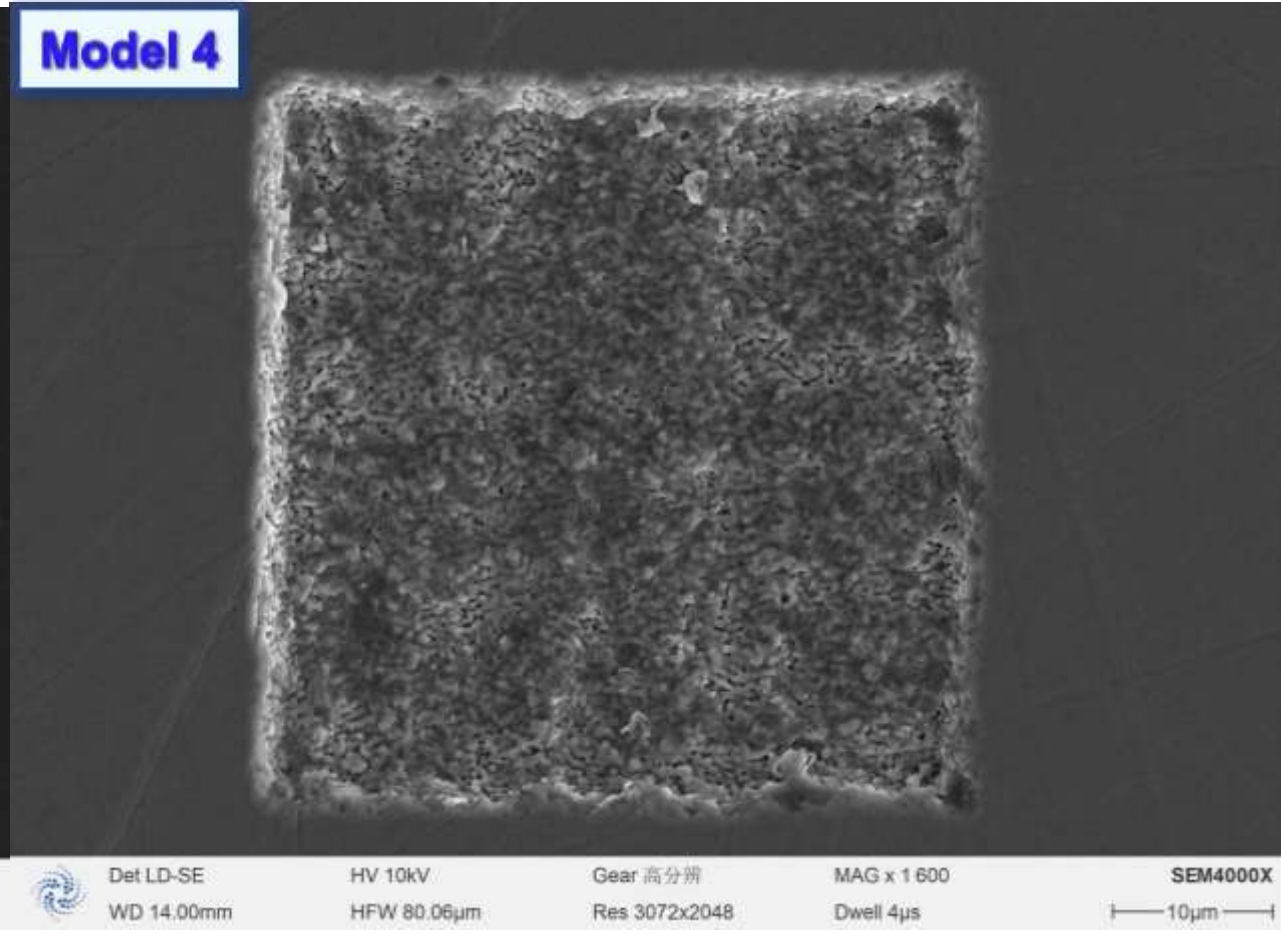

Energy: 50×50

MarkSpeed:10 W

JumpSpeed:100 W

LineInterval:1

n:15

MarkInterval:1000

Scanned area: 44μm

divider:150

layers:40

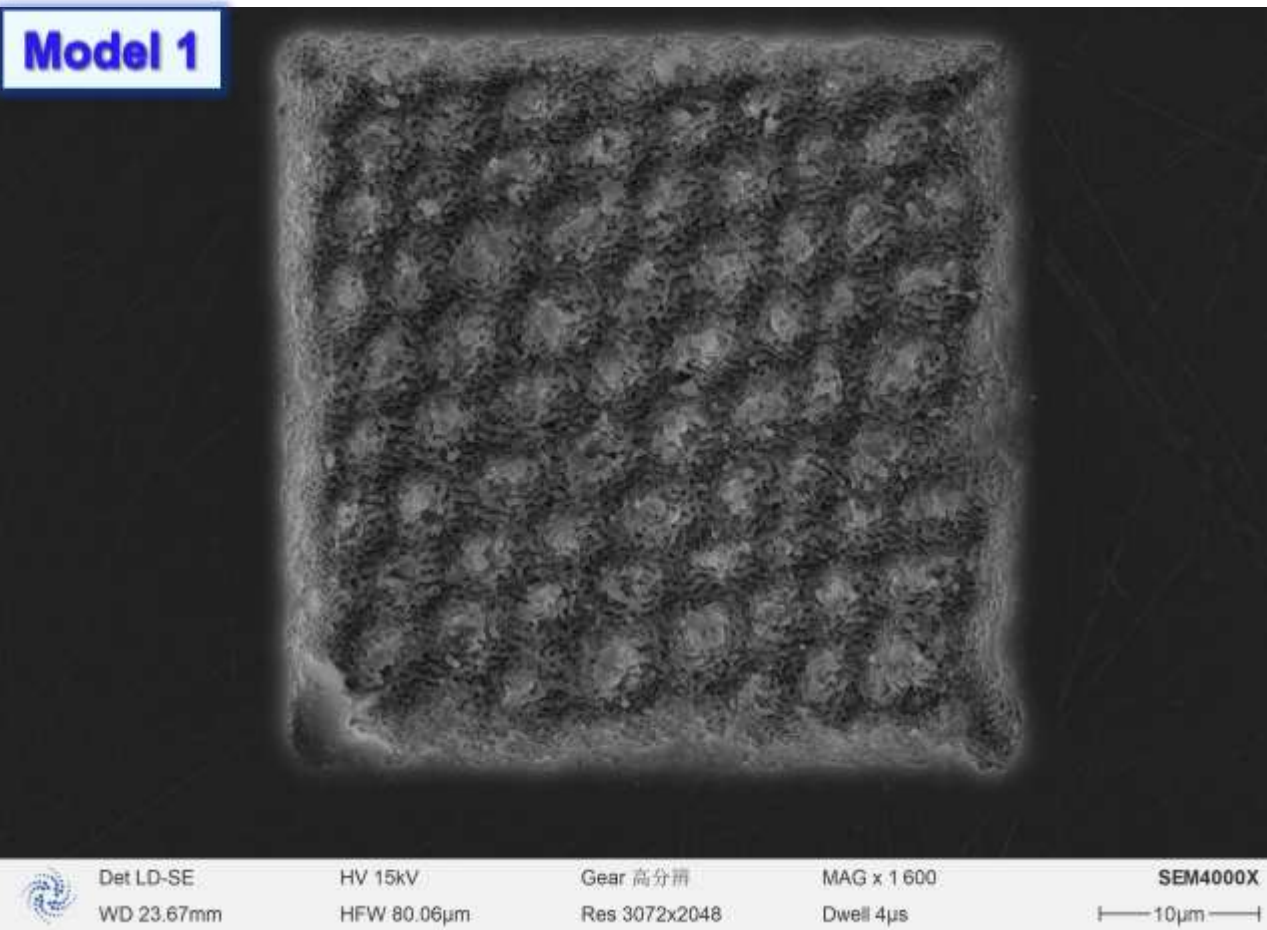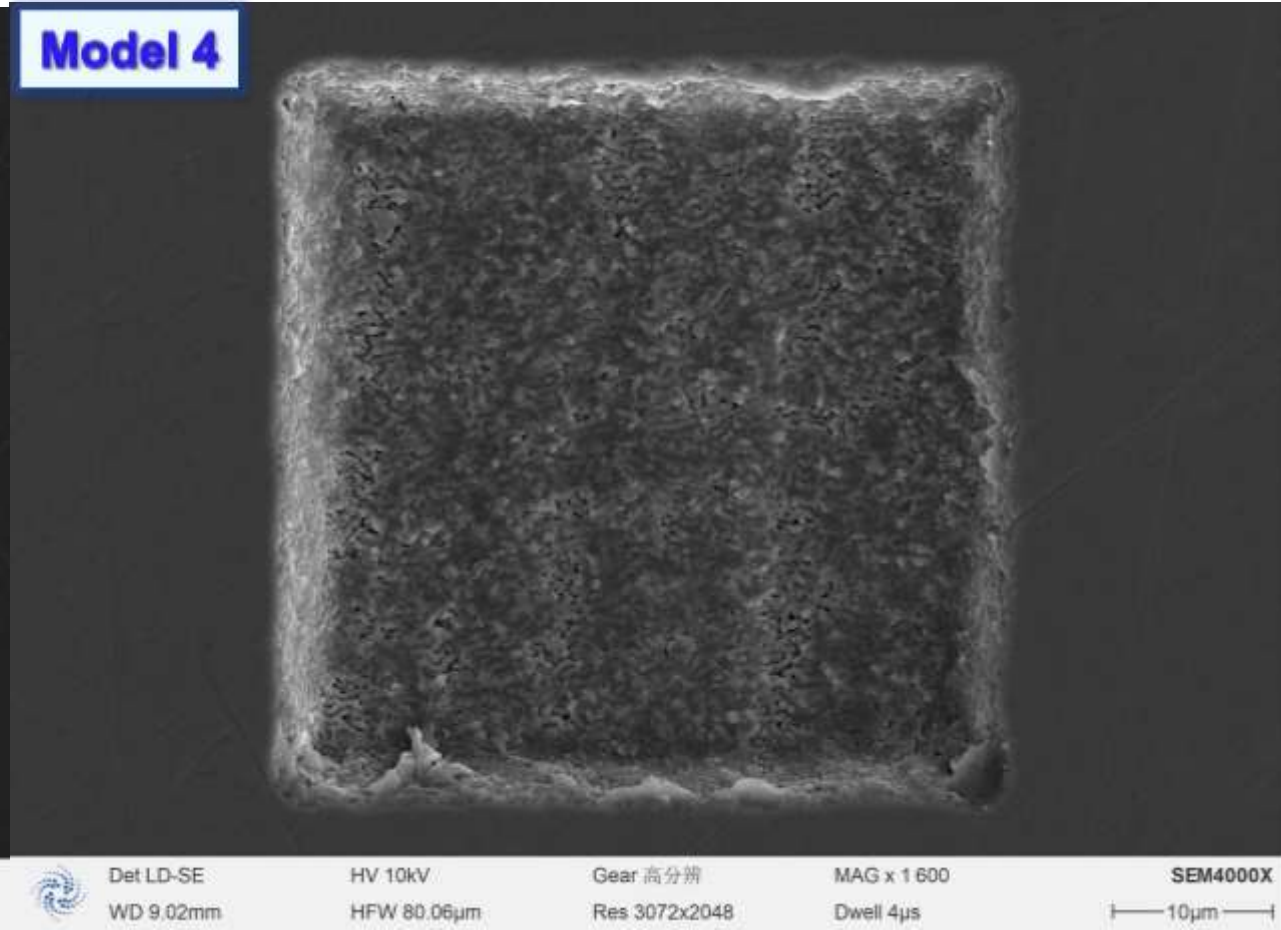

Energy: 50×50

MarkSpeed:10 W

JumpSpeed:100 W

LineInterval:1

n:15

MarkInterval:1000

Scanned area: 53μm

divider:10

layers:2

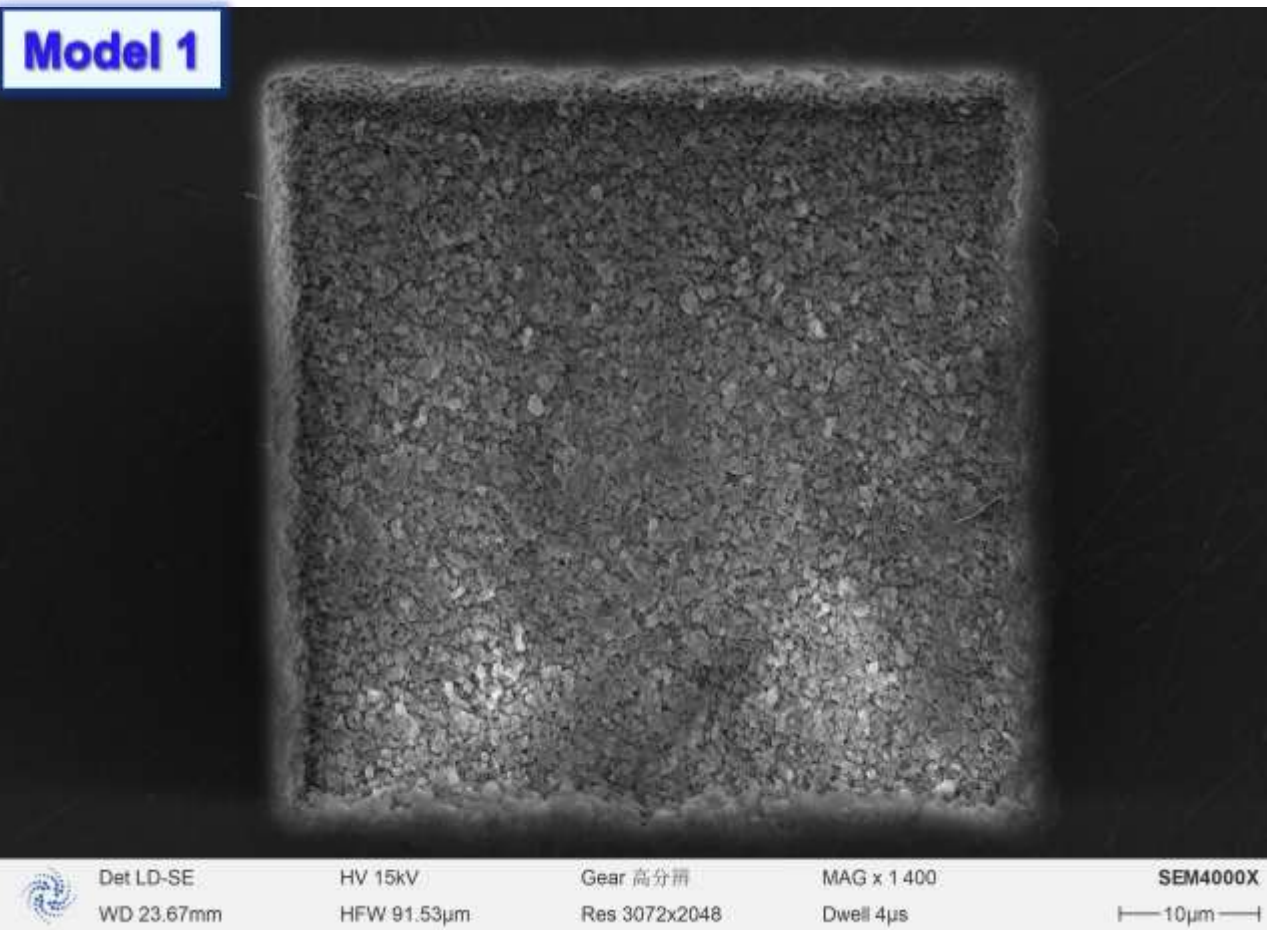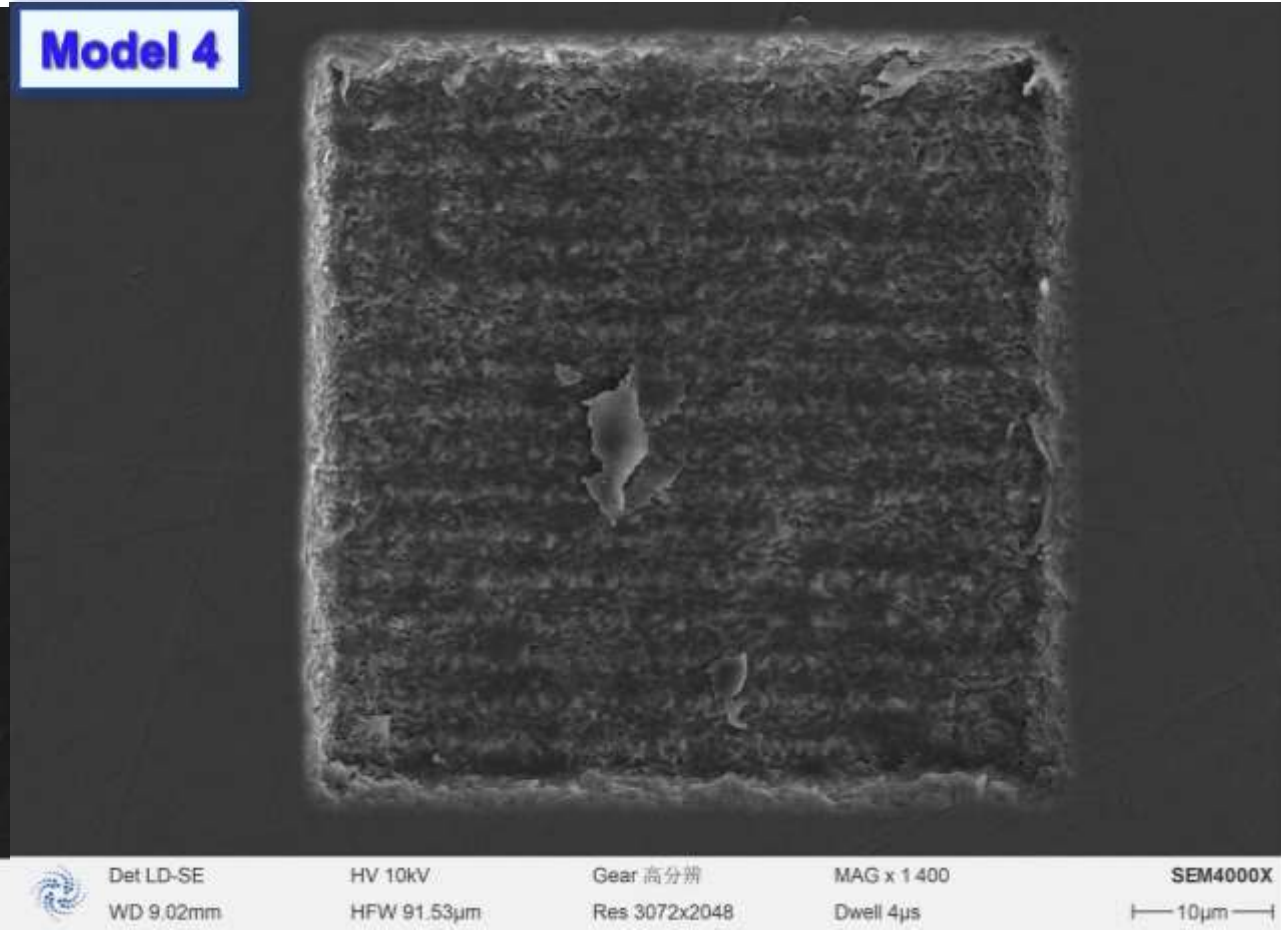

Energy: 50×50

MarkSpeed:10 W

JumpSpeed:100 W

LineInterval:1

n:18

MarkInterval:1000

Scanned area: 53 $\mu$ m

divider:10

layers:20

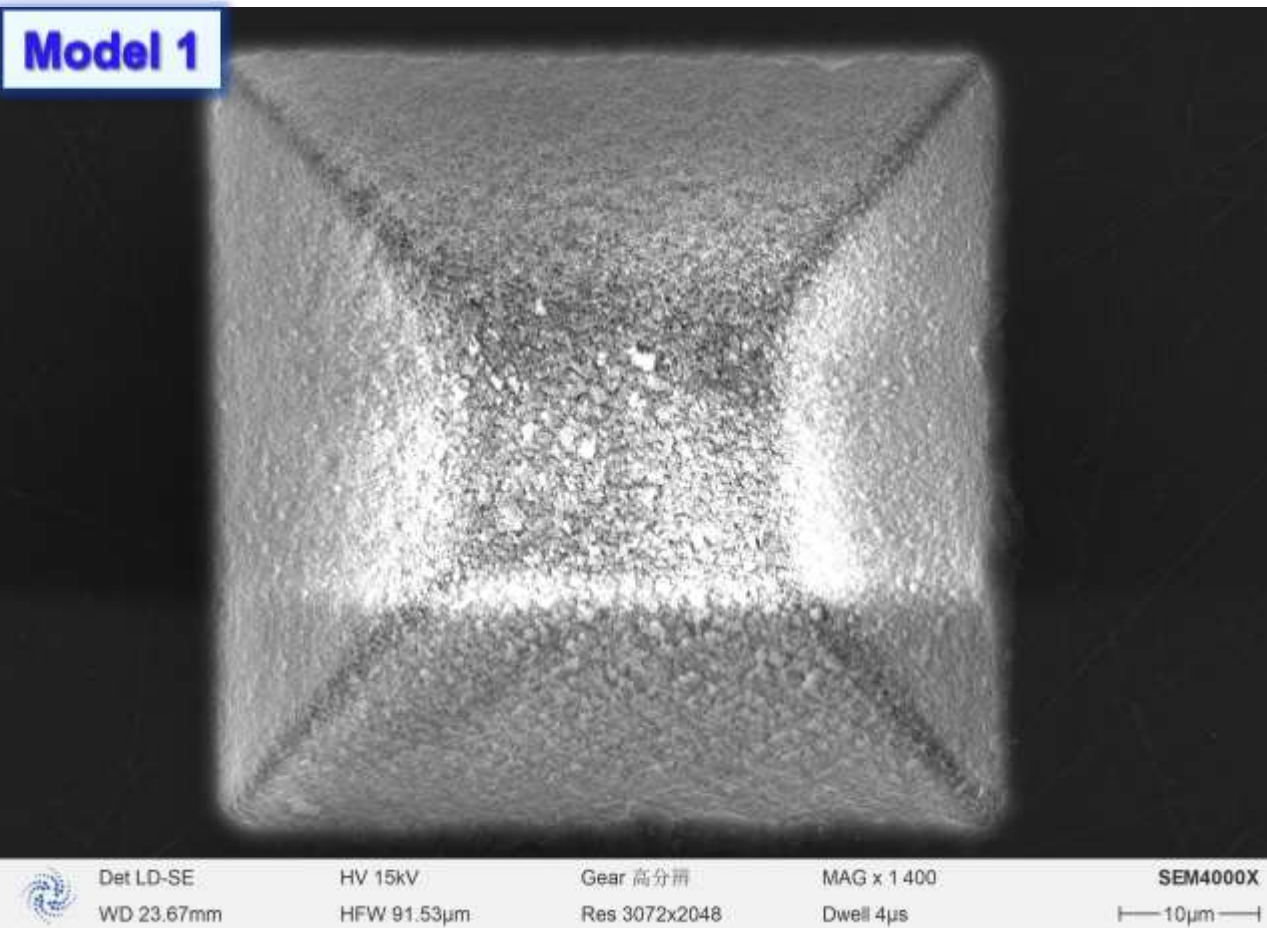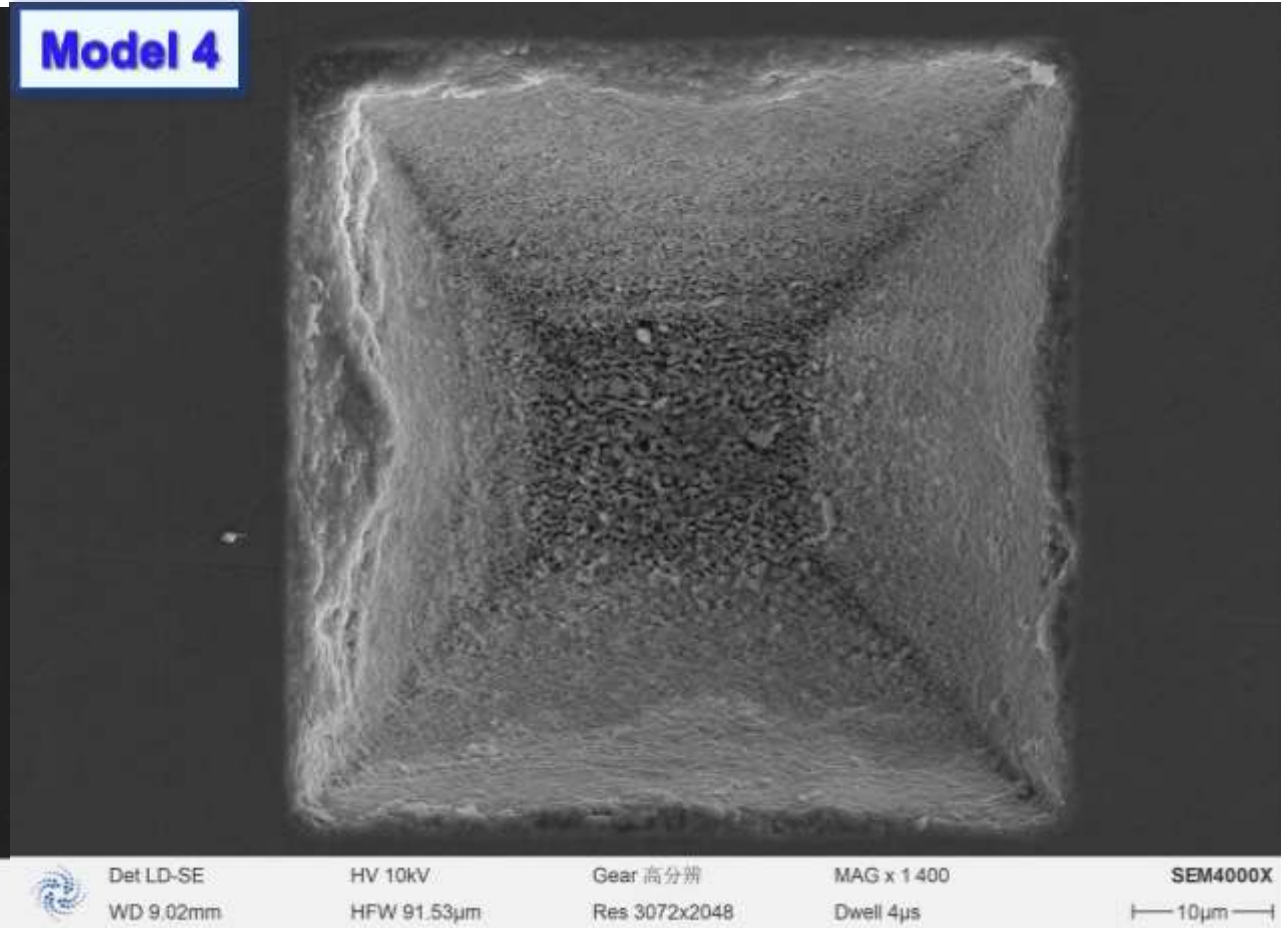

Energy: 50 $\times$ 50

MarkSpeed:10 W

JumpSpeed:100 W

LineInterval:1

n:18

MarkInterval:1000

Scanned area: 53μm

divider:10

layers:40

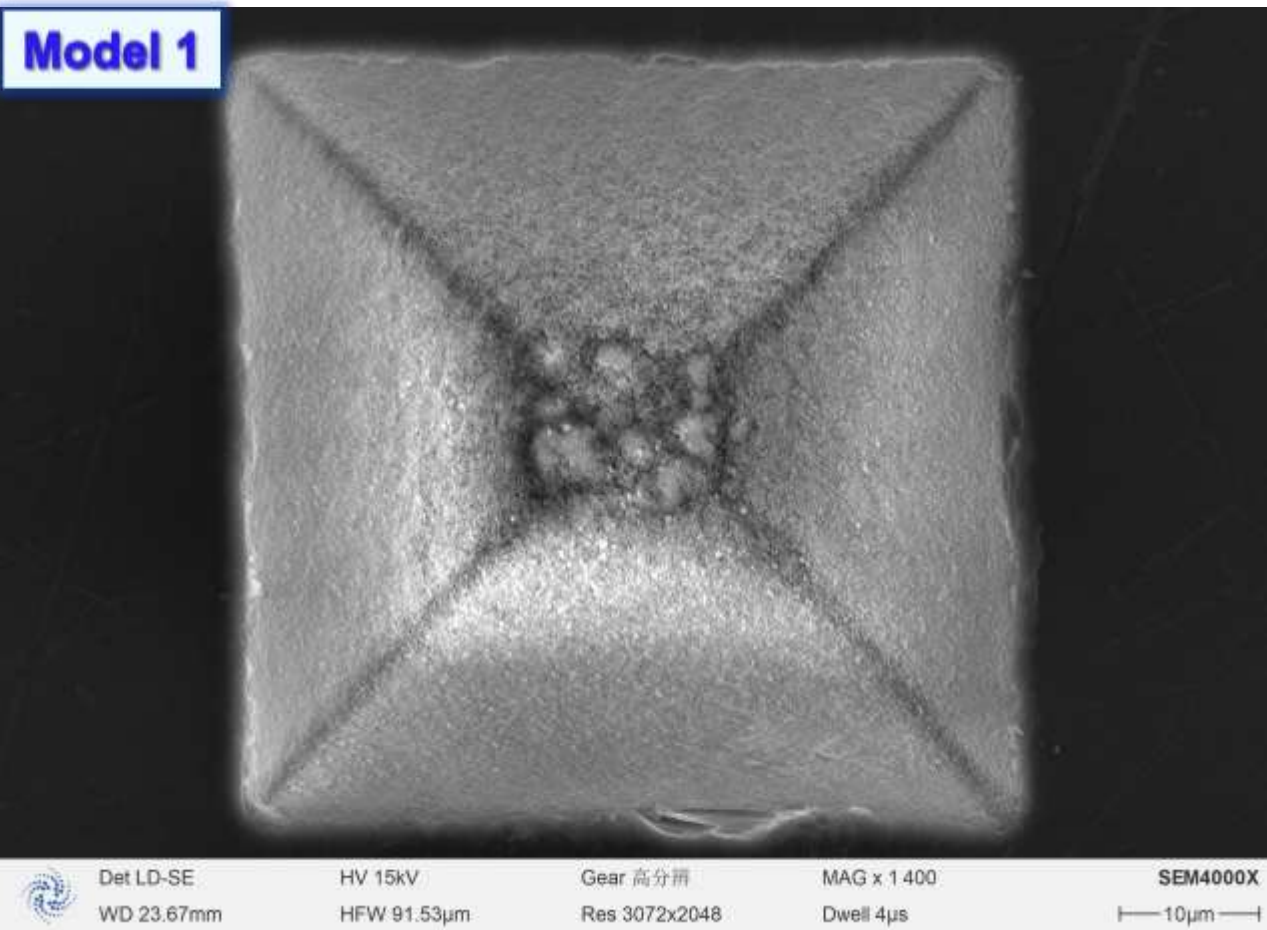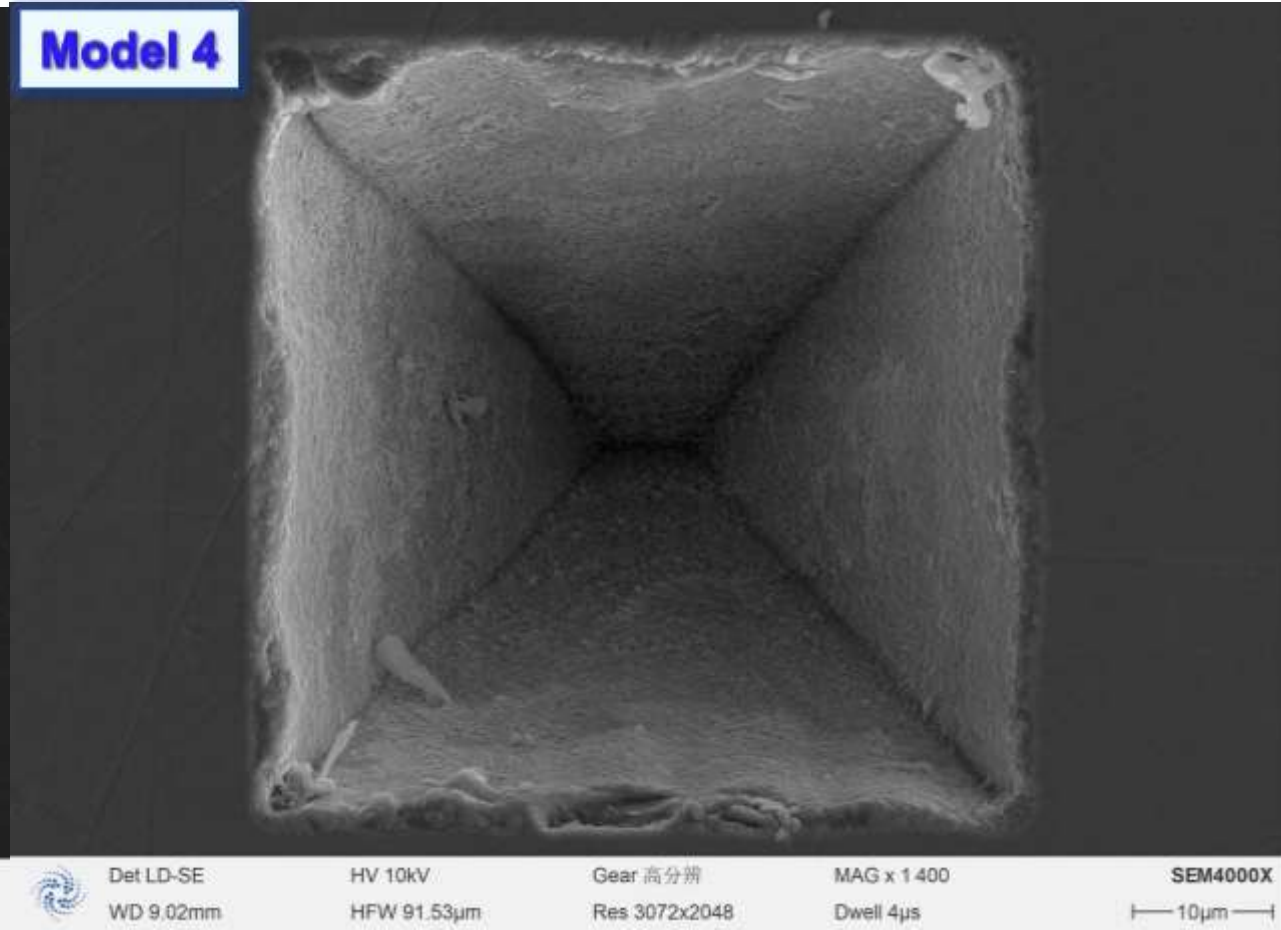

Energy: 50×50

MarkSpeed:10 W

JumpSpeed:100 W

LineInterval:1

n:18

MarkInterval:1000

Scanned area: 53μm

divider:50

layers:2

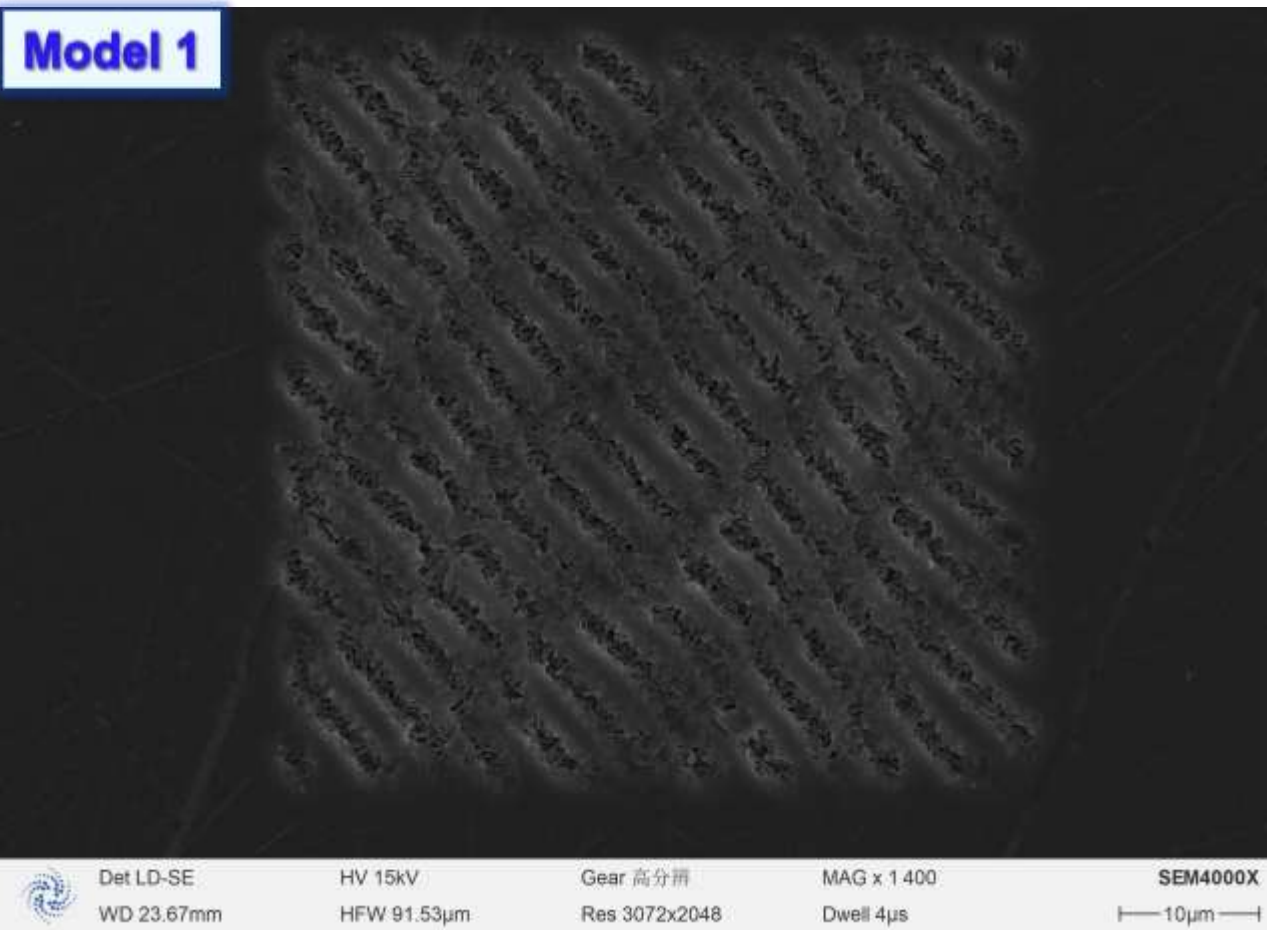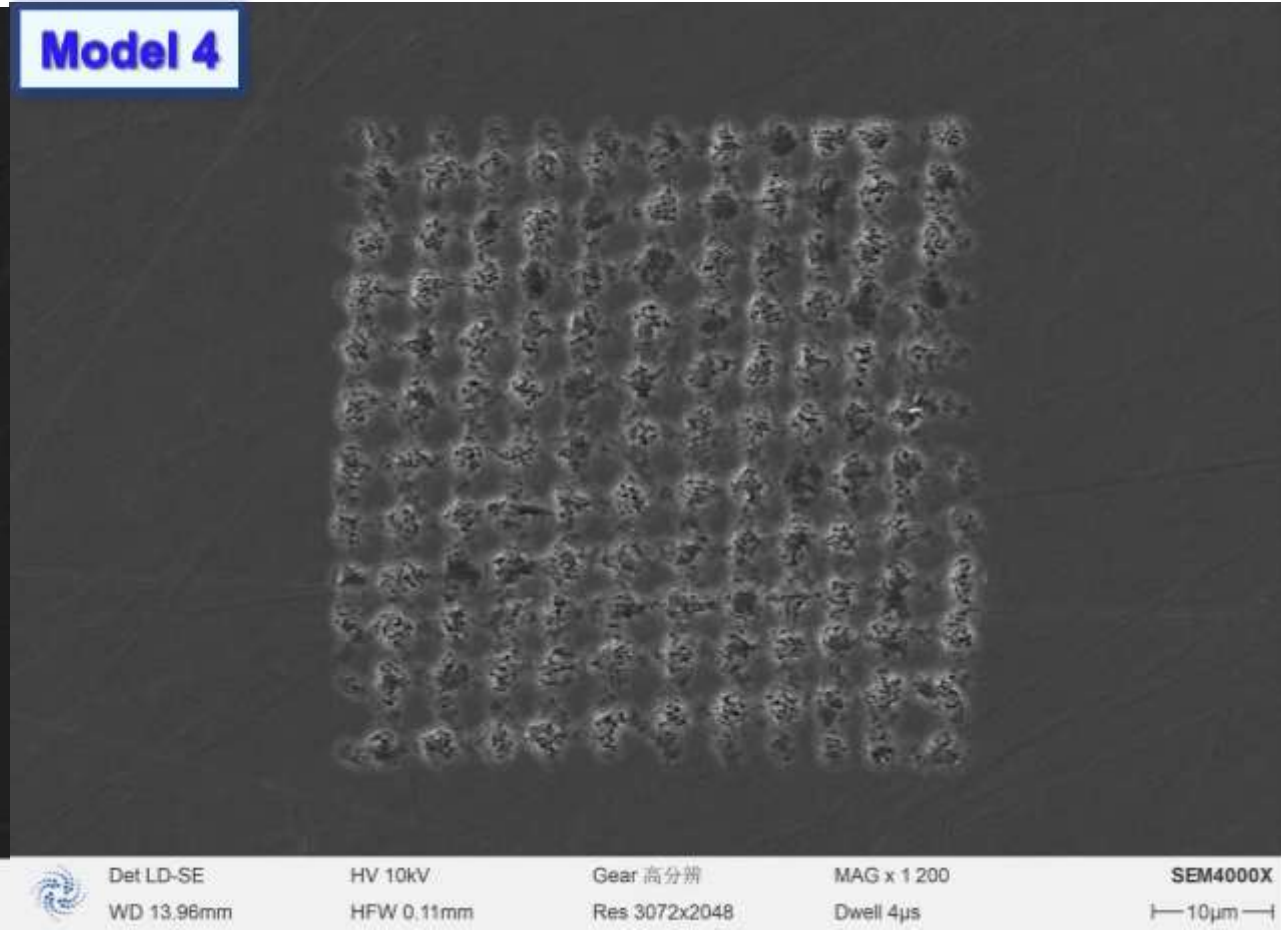

Energy: 50×50

MarkSpeed:10 W

JumpSpeed:100 W

LineInterval:1

n:18

MarkInterval:1000

Scanned area: 53μm

divider:50

layers:20

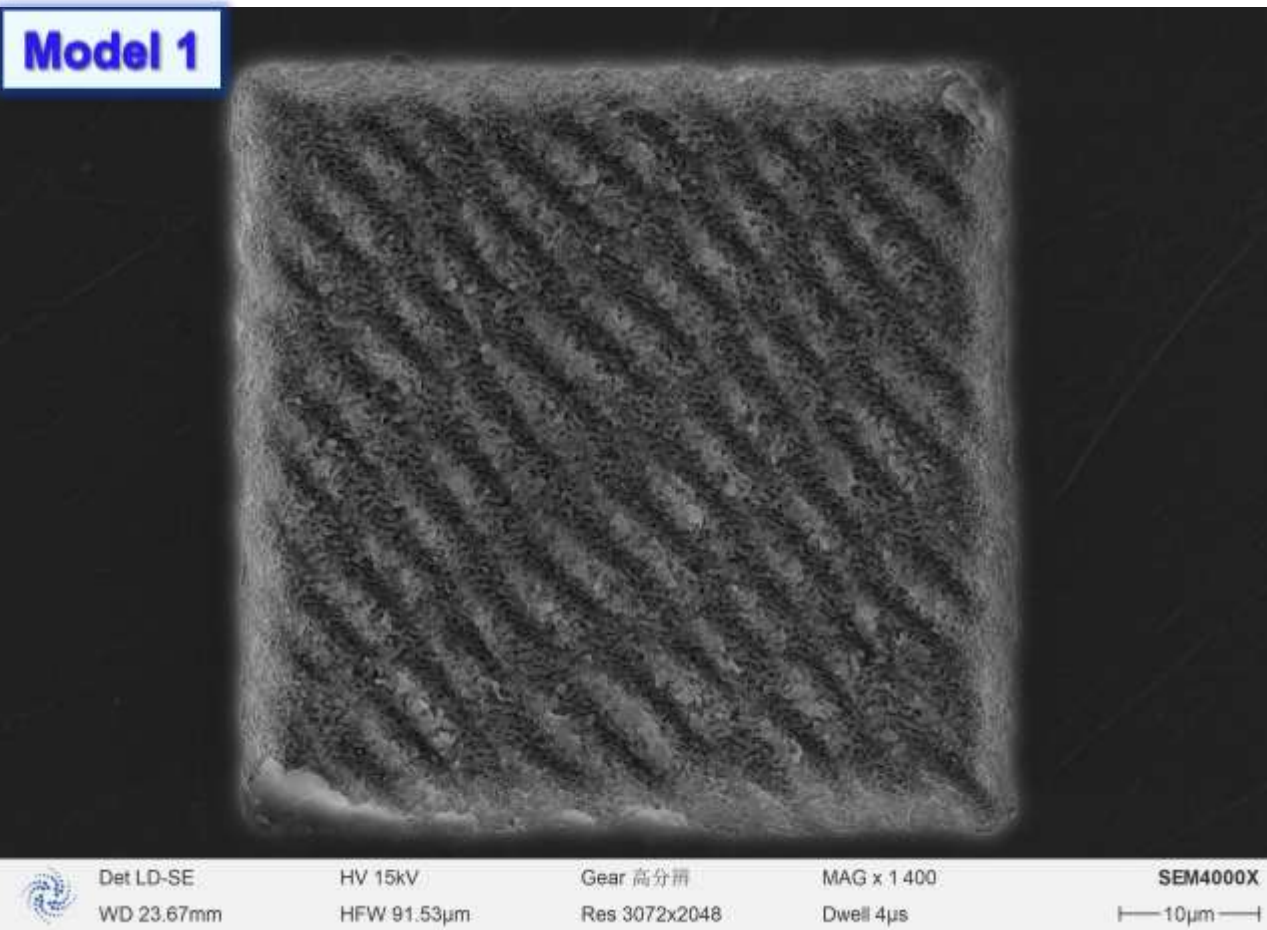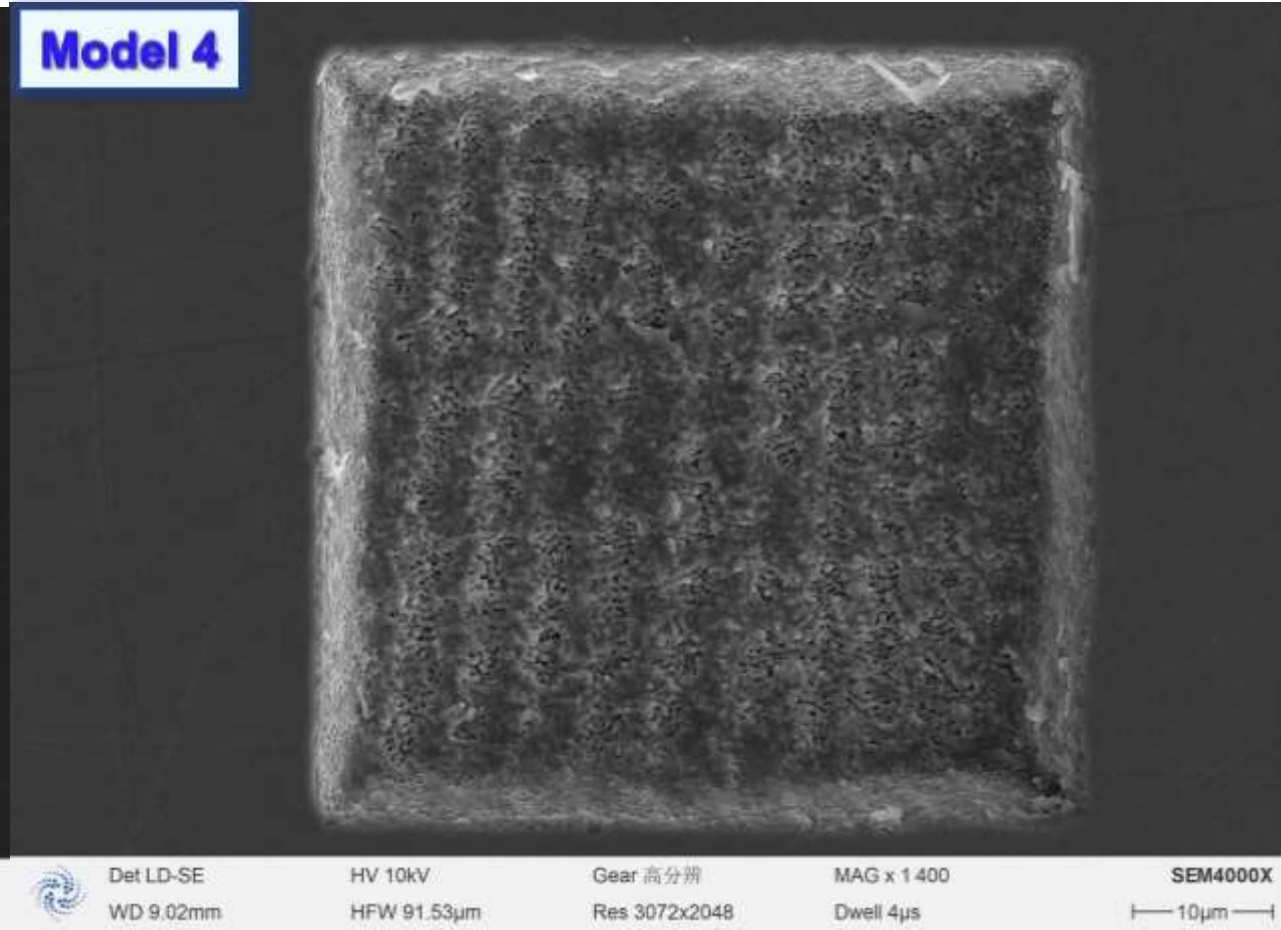

Energy: 50×50

MarkSpeed:10 W

JumpSpeed:100 W

LineInterval:1

n:18

MarkInterval:1000

Scanned area: 53μm

divider:50

layers:40

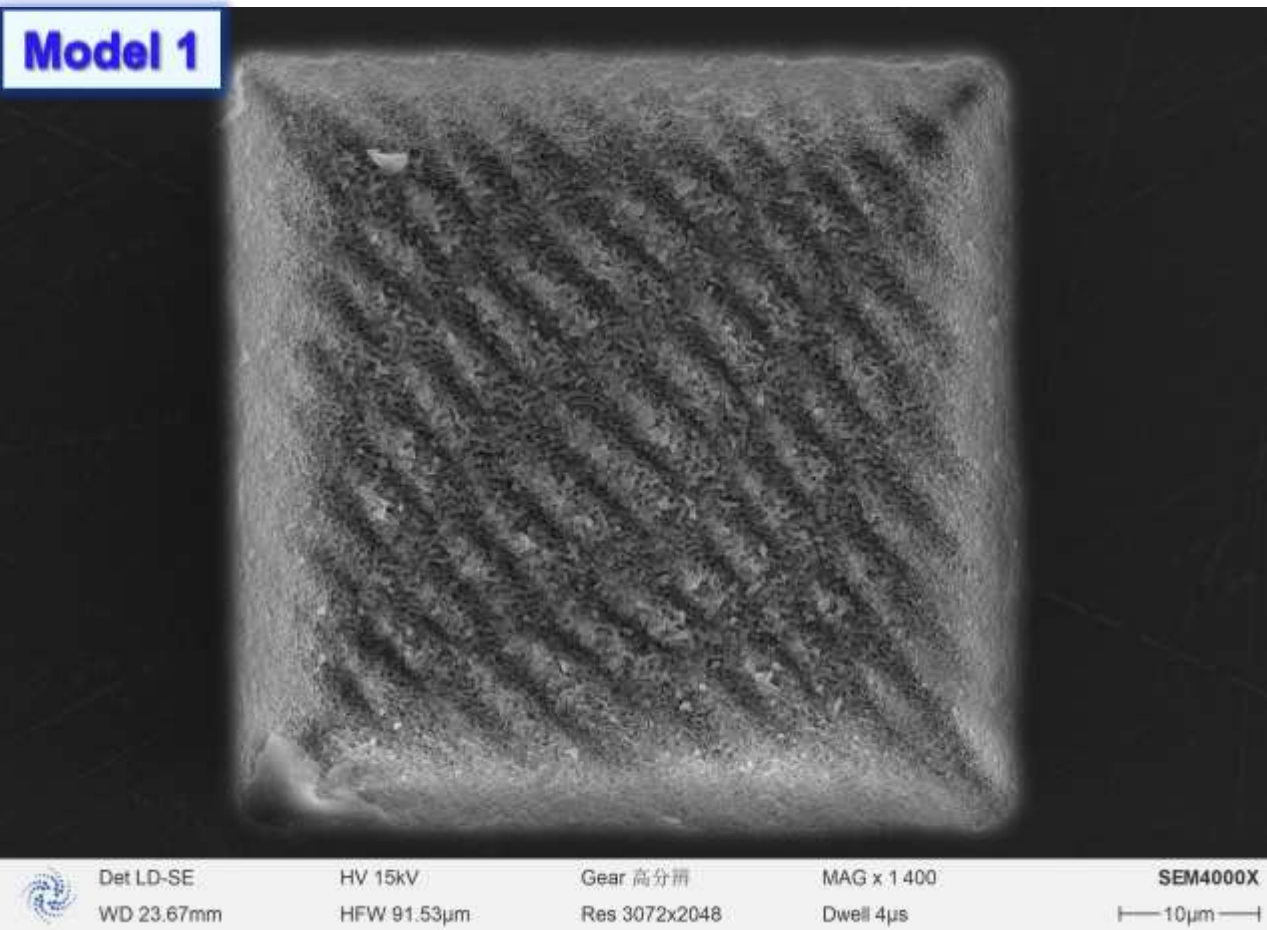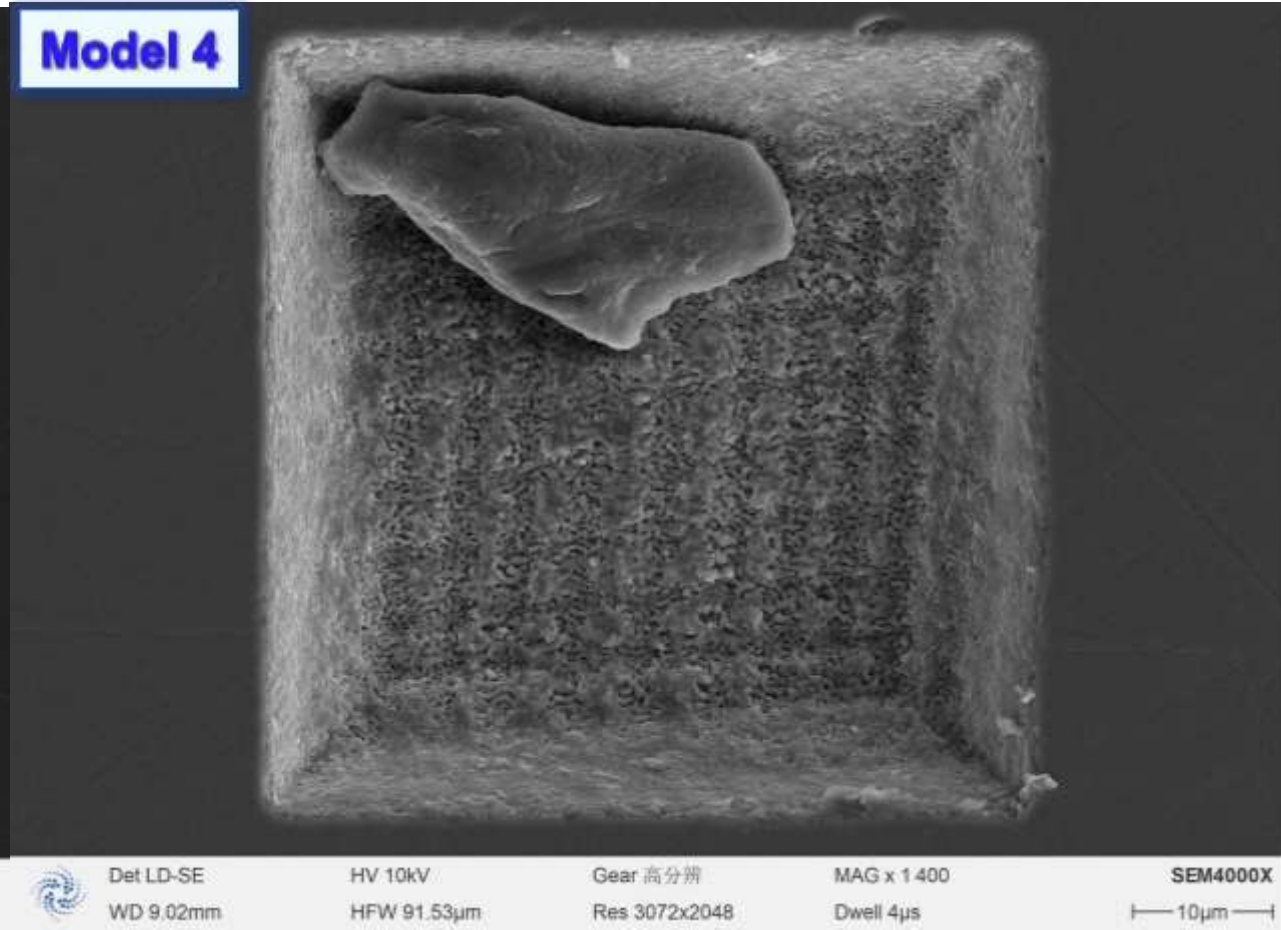

Energy: 50×50

MarkSpeed:10 W

JumpSpeed:100 W

LineInterval:1

n:18

MarkInterval:1000

Scanned area: 53 $\mu$ m

divider:150

layers:2

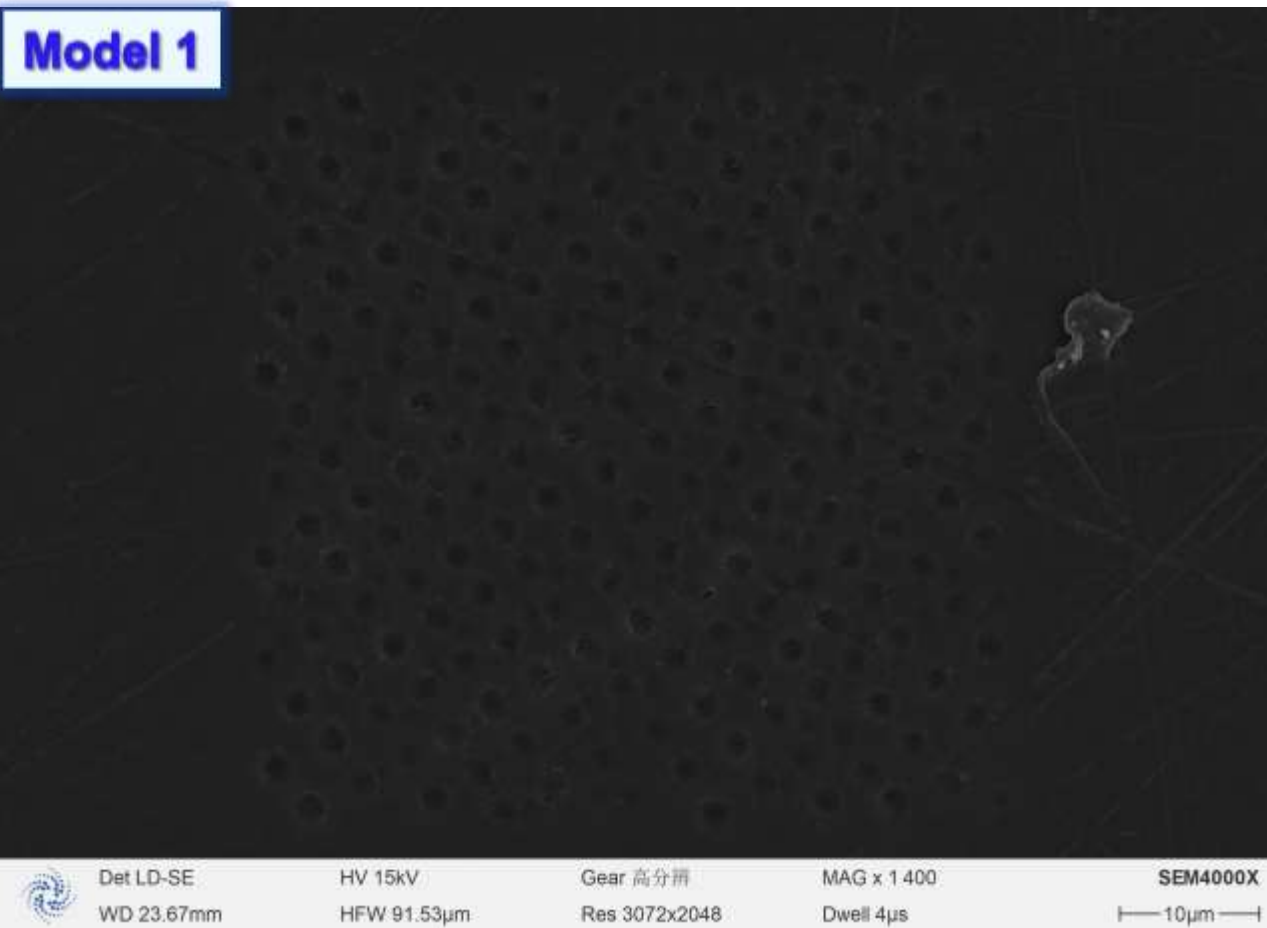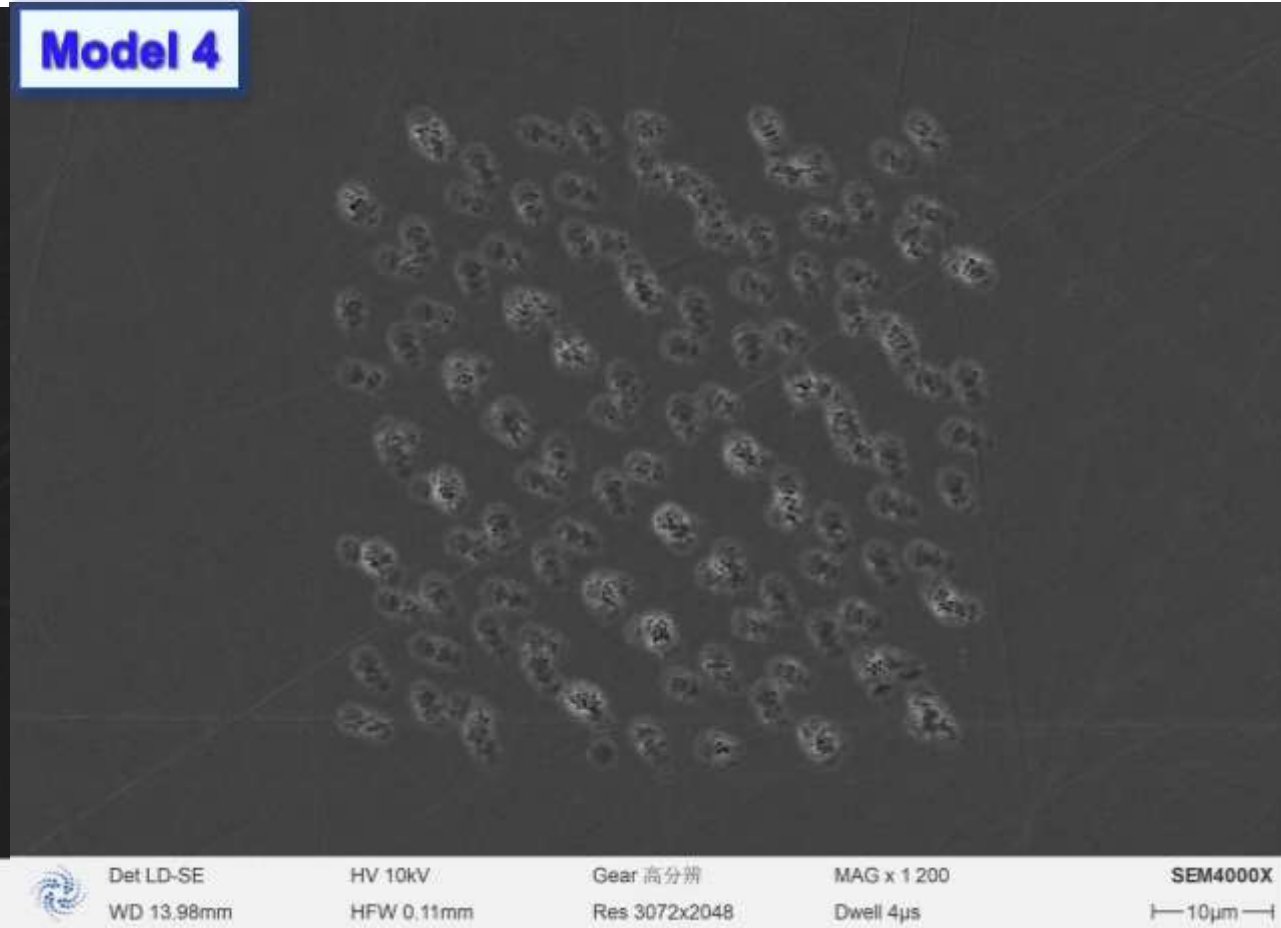

Energy: 50 $\times$ 50

MarkSpeed:10 W

JumpSpeed:100 W

LineInterval:1

n:18

MarkInterval:1000

Scanned area: 53 $\mu$ m

divider:150

layers:20

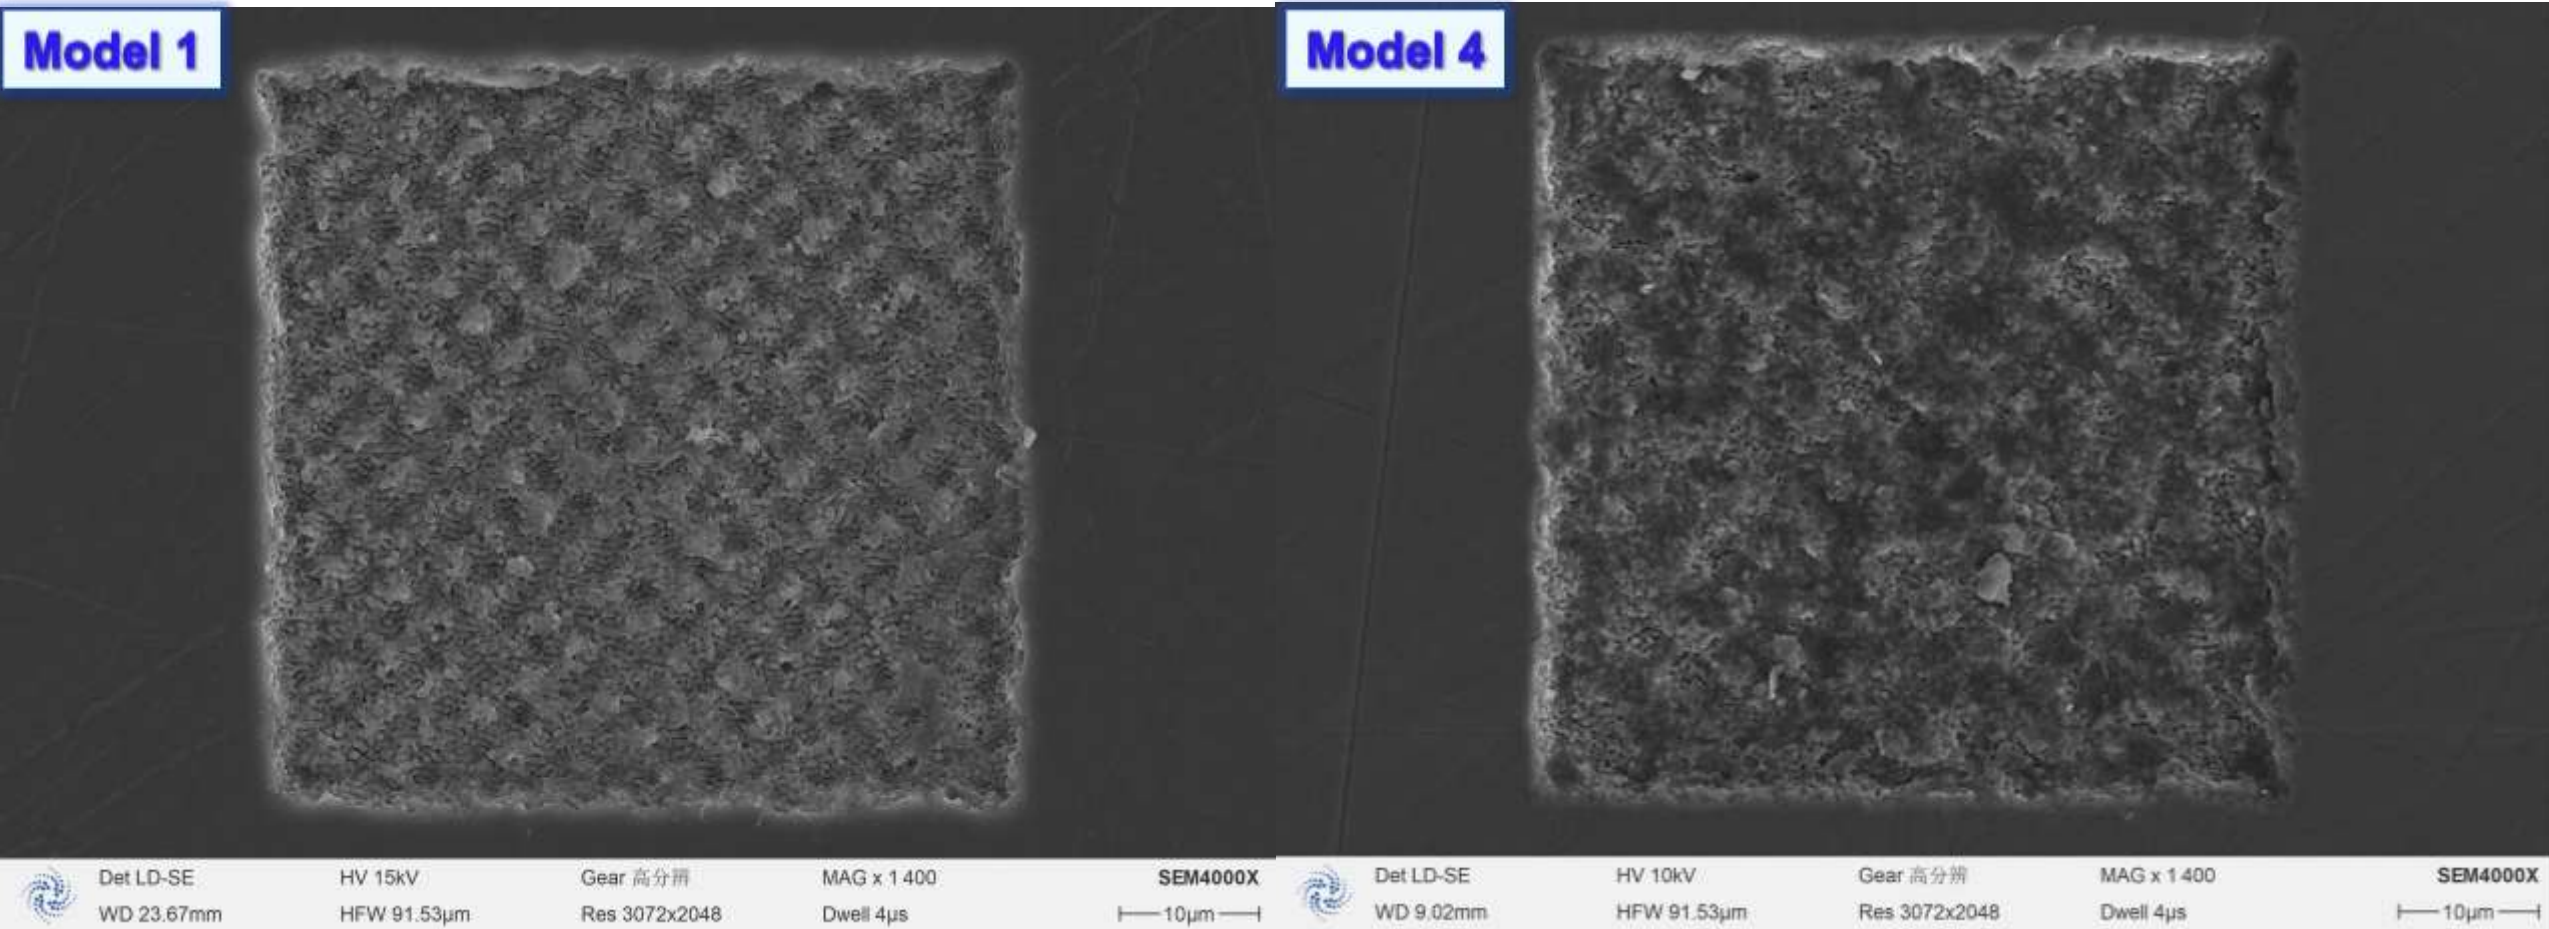

Energy: 50 $\times$ 50

MarkSpeed:10 W

JumpSpeed:100 W

LineInterval:1

n:18

MarkInterval:1000

Scanned area: 53 $\mu$ m

divider:150

layers:40

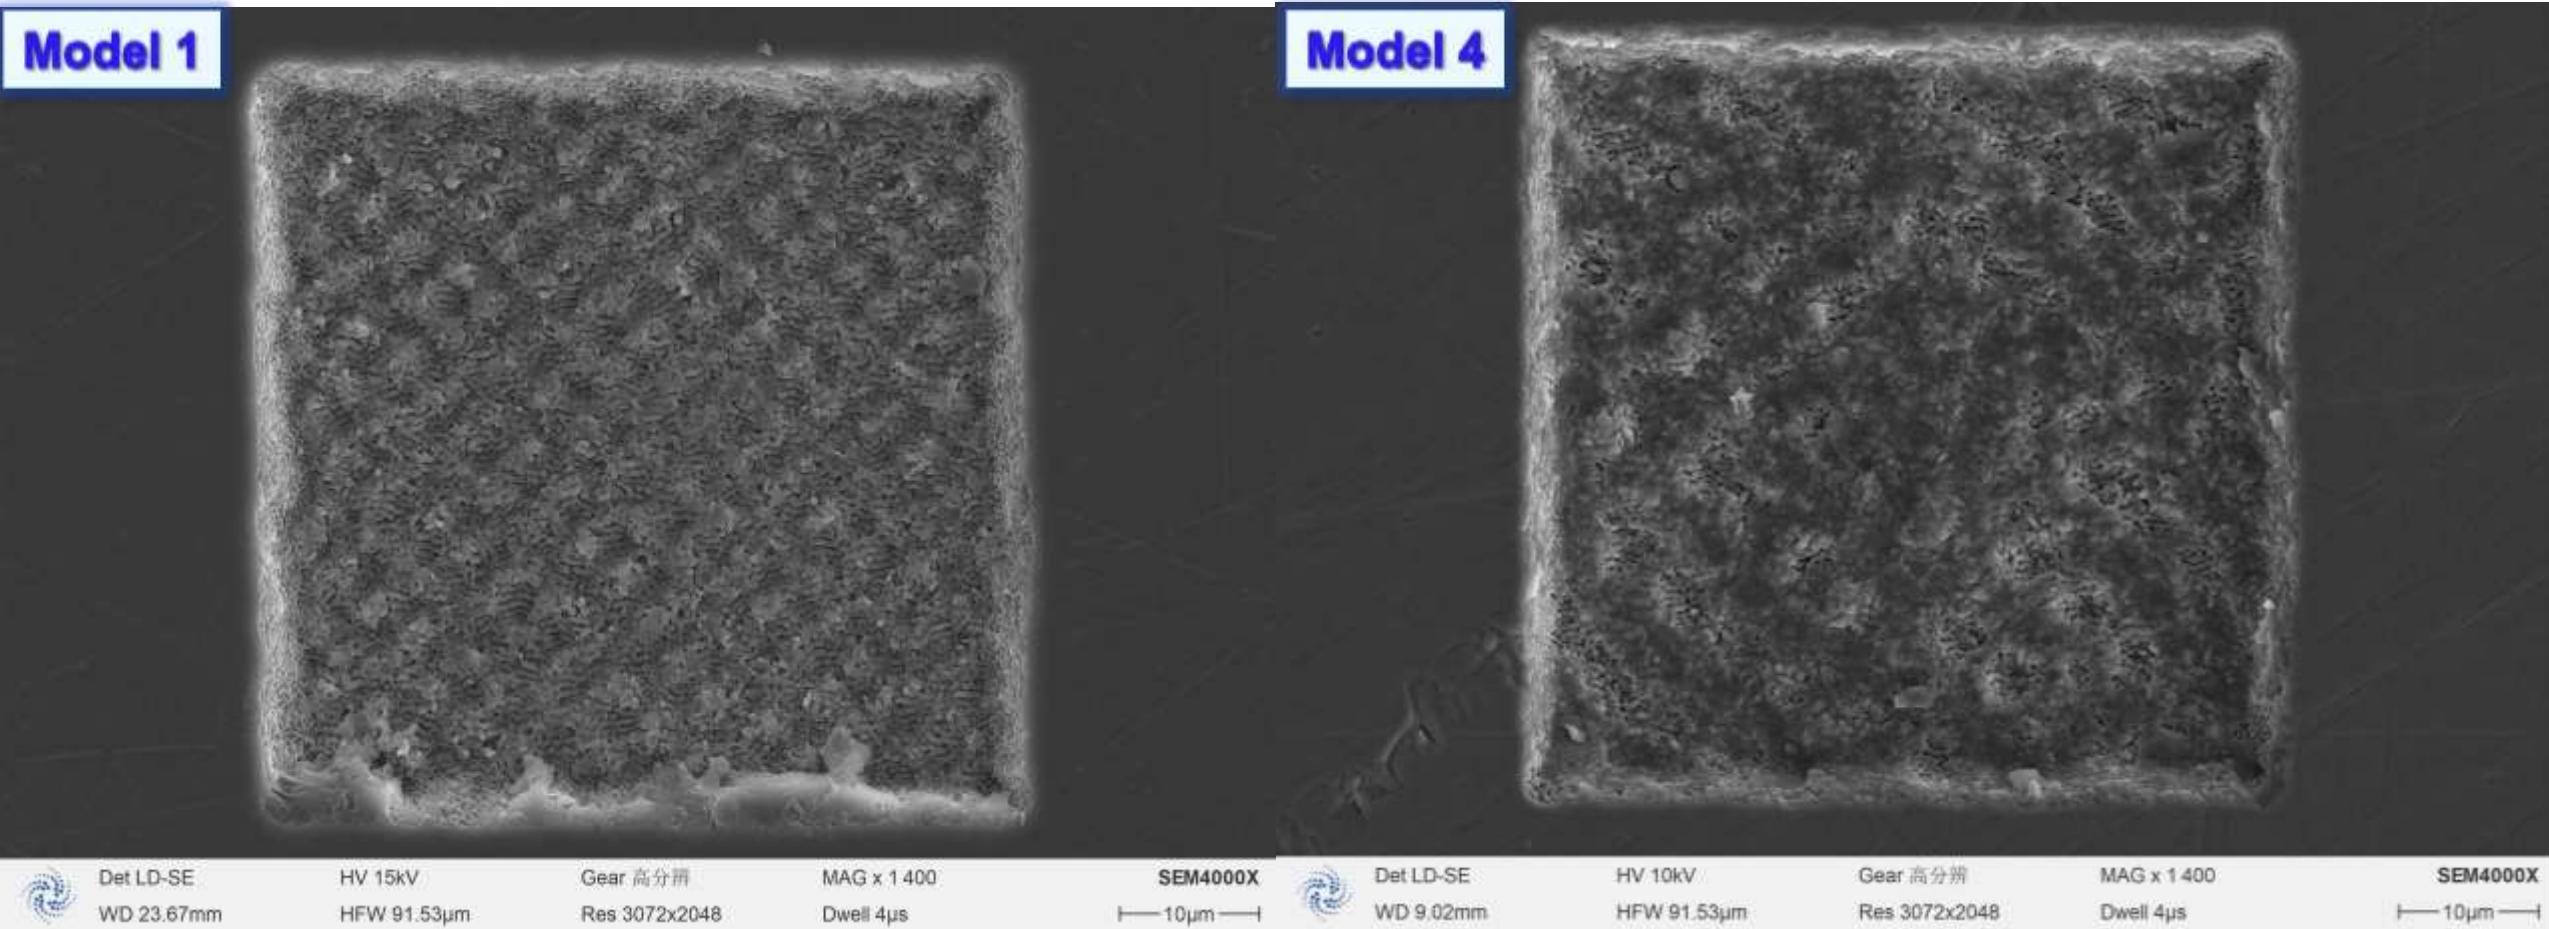

Energy: 50 $\times$ 50

MarkSpeed:10 W

JumpSpeed:100 W

LineInterval:1

n:18

MarkInterval:1000

Scanned area: 179 $\mu$ m

divider:10

layers:2

Model 1

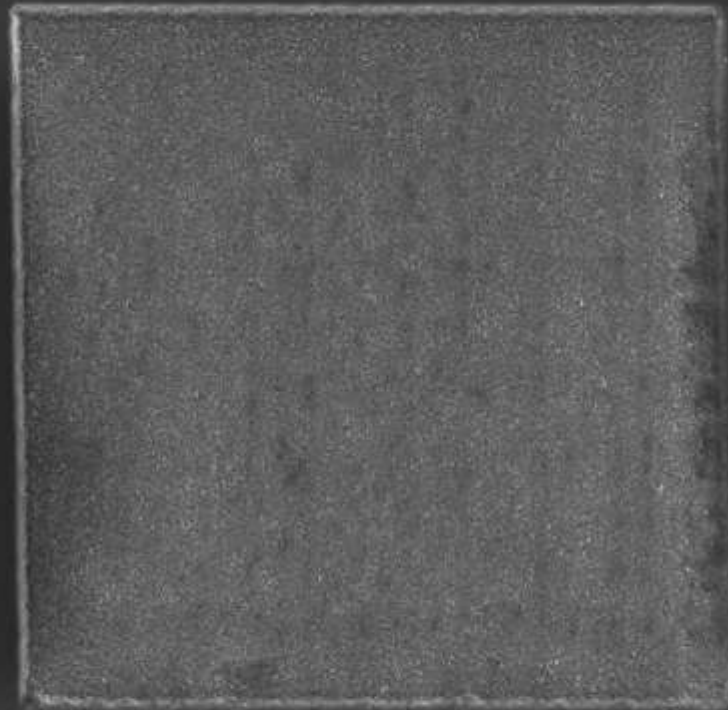

Model 4

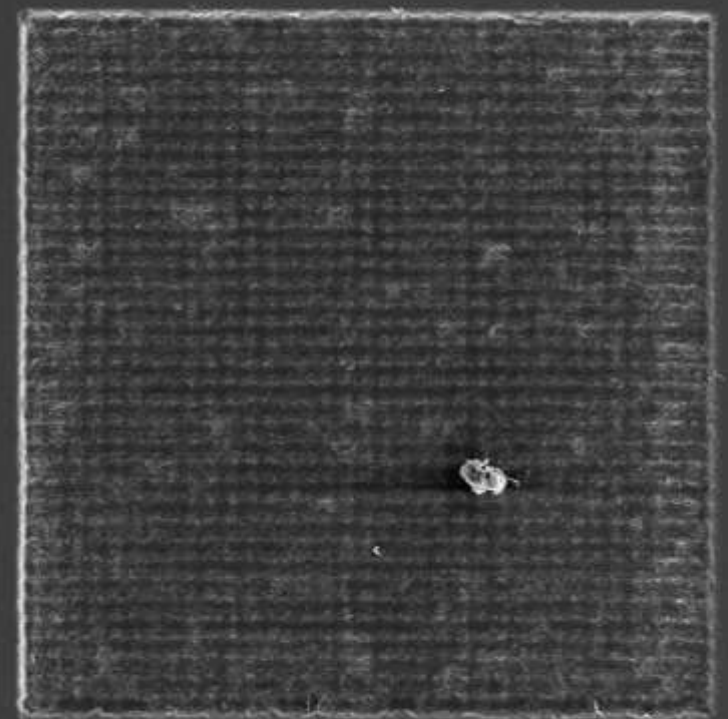

Det LD-SE HV 15kV Gear 高分辨 MAG x 400 SEM4000X  
WD 23.67mm HFW 0.32mm Res 3072x2048 Dwell 4 $\mu$ s  
I-20 $\mu$ m-I

Det LD-SE HV 10kV Gear 高分辨 MAG x 400 SEM4000X  
WD 13.76mm HFW 0.32mm Res 3072x2048 Dwell 4 $\mu$ s  
I-20 $\mu$ m-I

Energy: 50 $\times$ 50

MarkSpeed:10 W

JumpSpeed:100 W

LineInterval:1

n:36

MarkInterval:1000

Scanned area: 179 $\mu$ m

divider:10

layers:20

Model 1

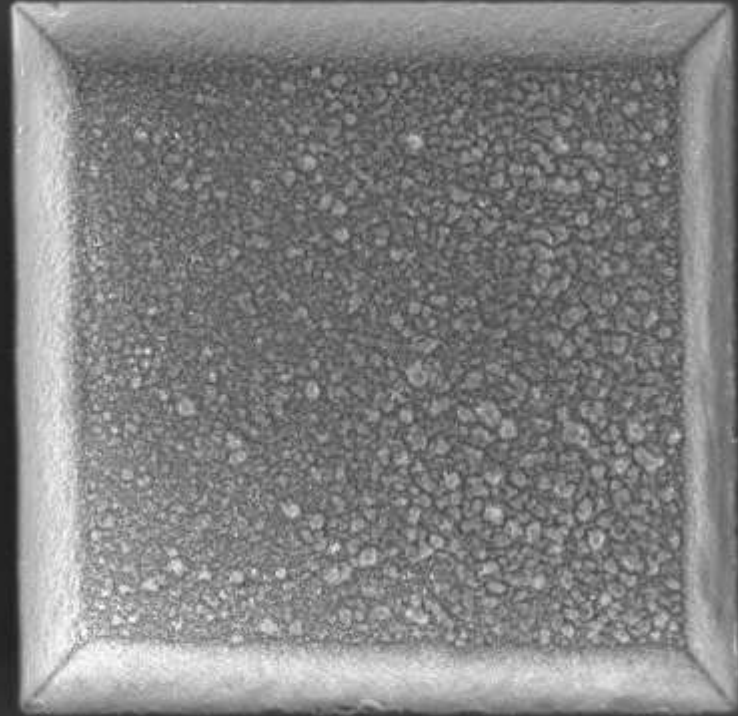

Det LD-SE HV 15kV Gear 高分辨 MAG x 400 SEM4000X  
WD 23.67mm HFW 0.32mm Res 3072x2048 Dwell 4 $\mu$ s  $\pm$ 20 $\mu$ m

Model 4

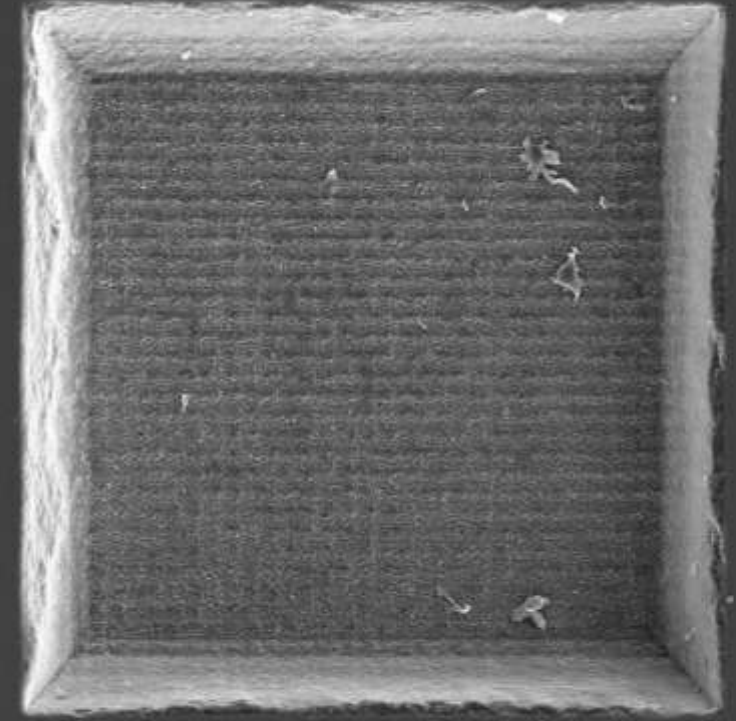

Det LD-SE HV 10kV Gear 高分辨 MAG x 400 SEM4000X  
WD 13.77mm HFW 0.32mm Res 3072x2048 Dwell 4 $\mu$ s  $\pm$ 20 $\mu$ m

Energy: 50 $\times$ 50

MarkSpeed:10 W

JumpSpeed:100 W

LineInterval:1

n:36

MarkInterval:1000

Scanned area: 179 $\mu$ m

divider:10

layers:40

Model 1

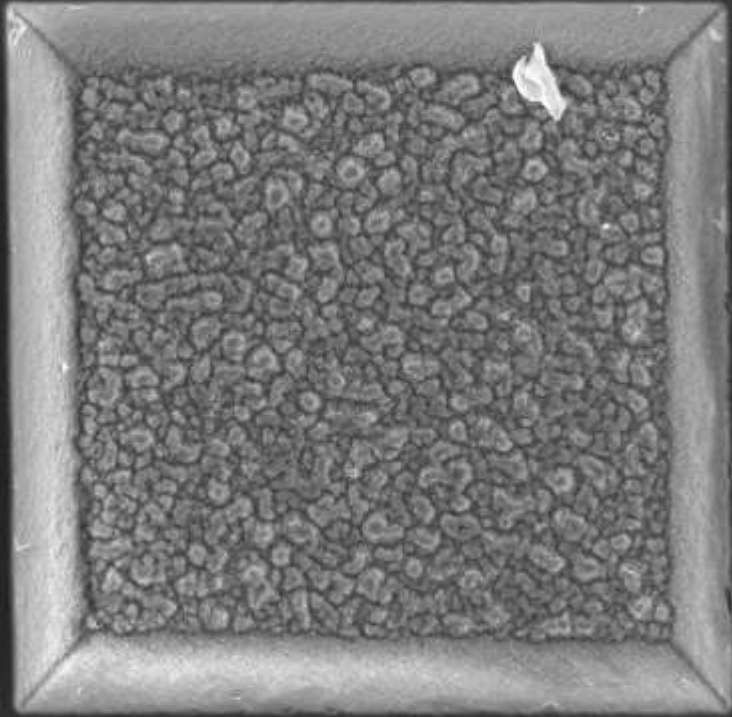

Model 4

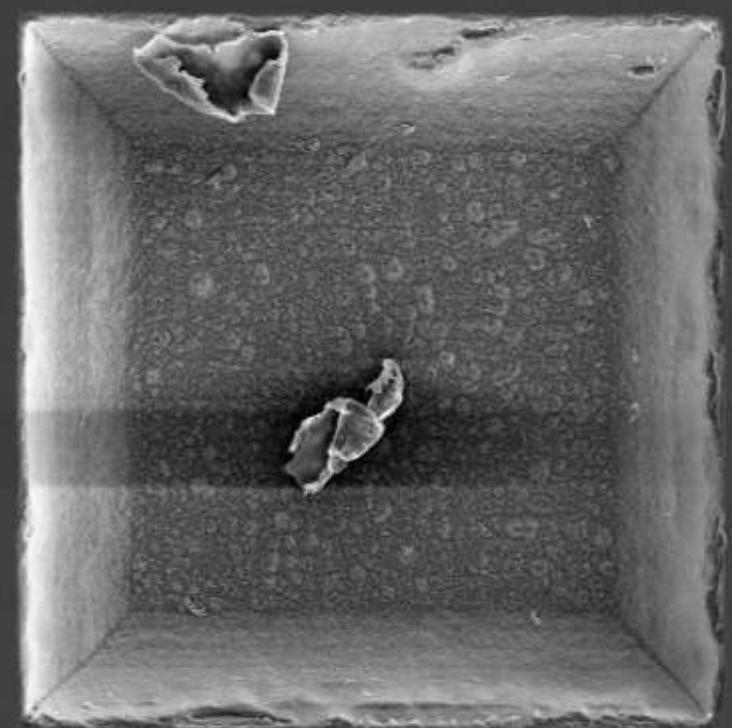

Det LD-SE HV 15kV Gear 高分辨 MAG x 400  
WD 23.67mm HFW 0.32mm Res 3072x2048 Dwell 4 $\mu$ s

SEM4000X  
┌-20 $\mu$ m┐

Det LD-SE HV 10kV Gear 高分辨 MAG x 400  
WD 13.82mm HFW 0.32mm Res 3072x2048 Dwell 4 $\mu$ s

SEM4000X  
┌-20 $\mu$ m┐

Energy: 50 $\times$ 50

MarkSpeed:10 W

JumpSpeed:100 W

LineInterval:1

n:36

MarkInterval:1000

Scanned area: 179 $\mu$ m

divider:50

layers:2

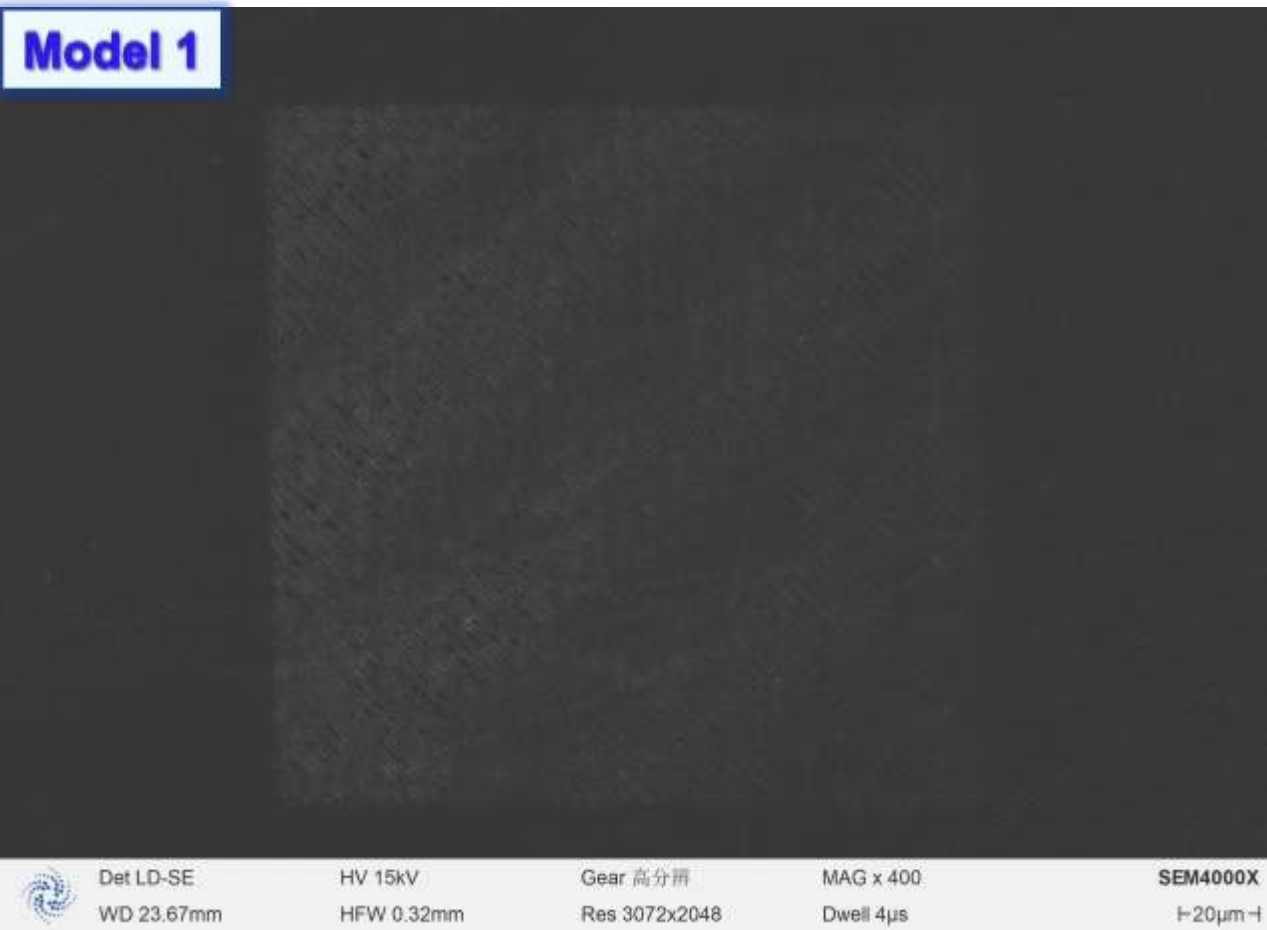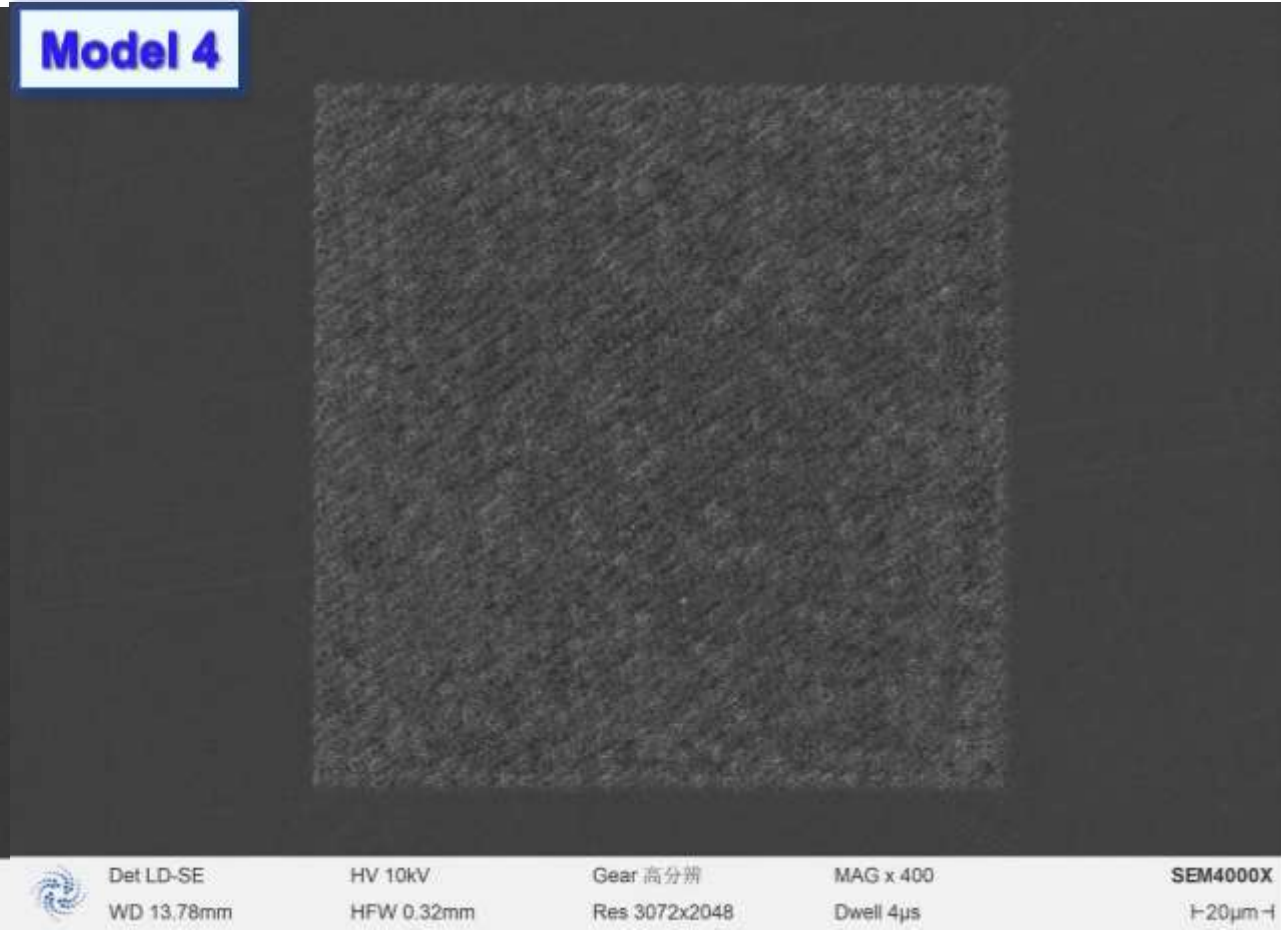

Energy: 50 $\times$ 50

MarkSpeed:10 W

JumpSpeed:100 W

LineInterval:1

n:36

MarkInterval:1000

Scanned area: 179 $\mu$ m

divider:50

layers:20

Model 1

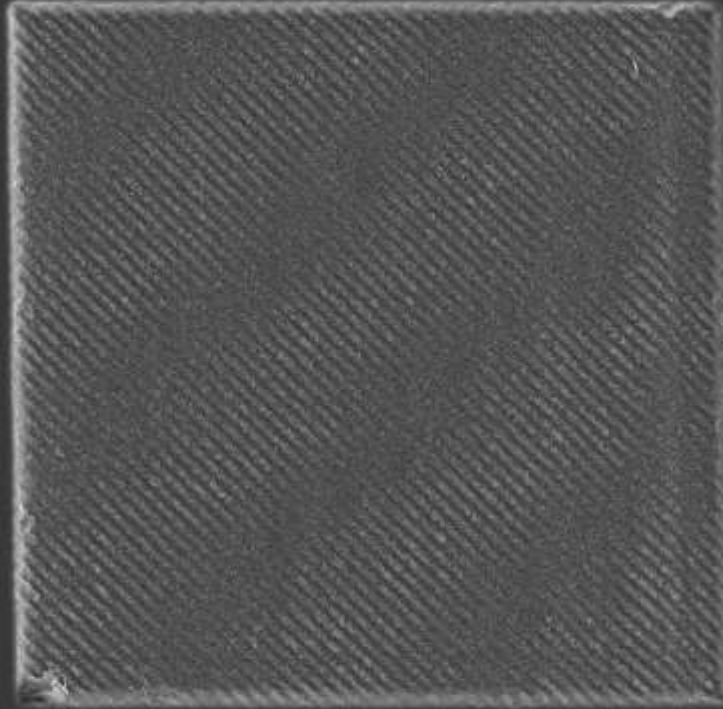

Model 4

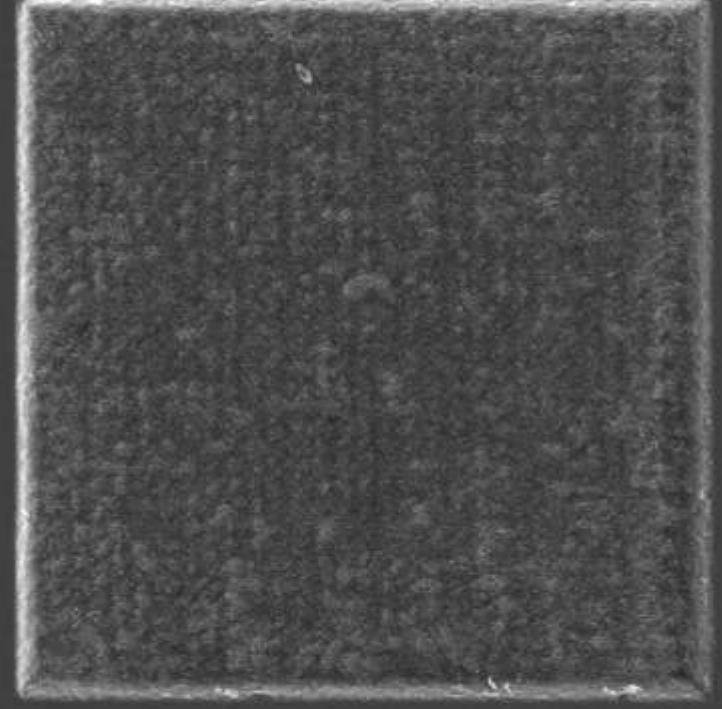

Det LD-SE HV 15kV Gear 高分辨 MAG x 400 SEM4000X  
WD 23.67mm HFW 0.32mm Res 3072x2048 Dwell 4 $\mu$ s  $\pm$ 20 $\mu$ m

Det LD-SE HV 10kV Gear 高分辨 MAG x 400 SEM4000X  
WD 13.67mm HFW 0.32mm Res 3072x2048 Dwell 4 $\mu$ s  $\pm$ 20 $\mu$ m

Energy: 50 $\times$ 50

MarkSpeed:10 W

JumpSpeed:100 W

LineInterval:1

n:36

MarkInterval:1000

Scanned area: 179 $\mu$ m

divider:50

layers:40

Model 1

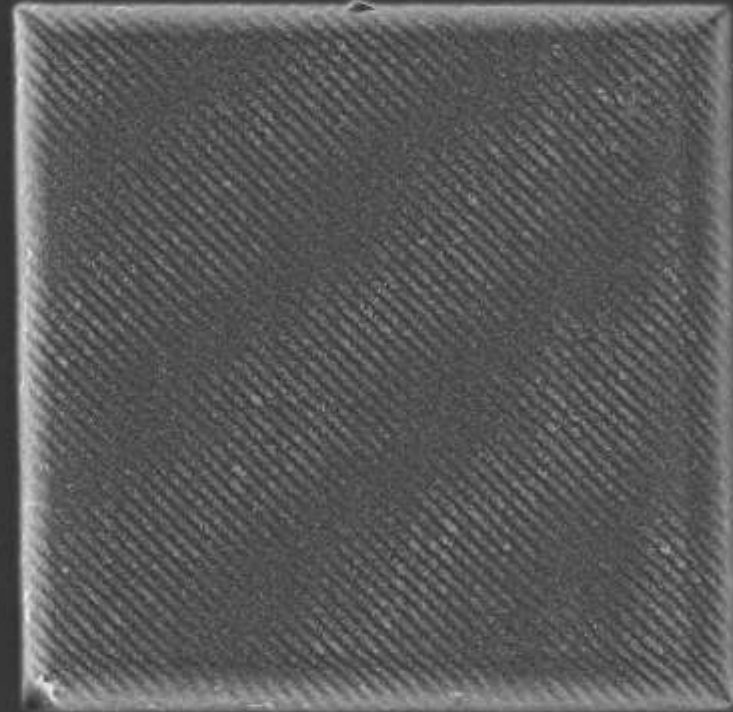

Model 4

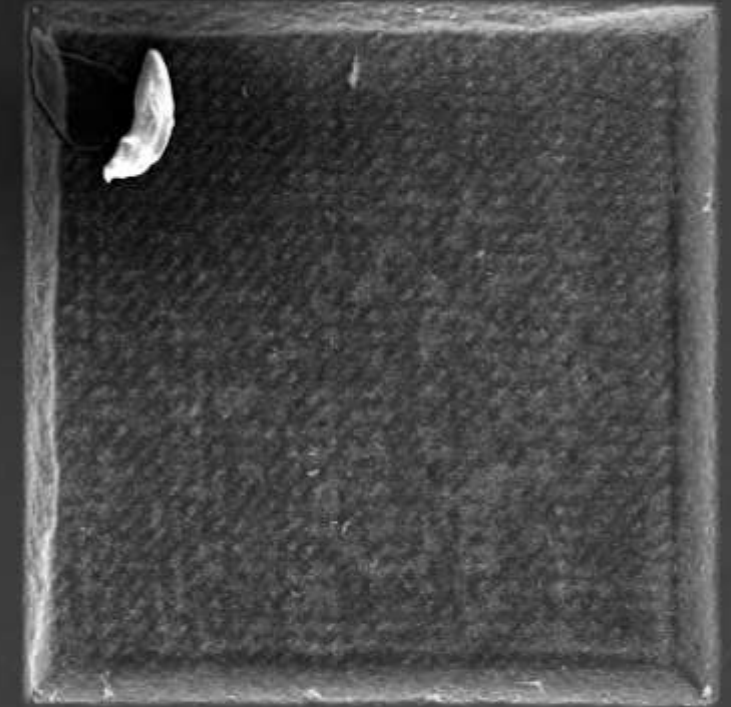

Det LD-SE HV 15kV Gear 高分辨 MAG x 400  
WD 23.67mm HFW 0.32mm Res 3072x2048 Dwell 4 $\mu$ s

SEM4000X Det LD-SE HV 10kV Gear 高分辨 MAG x 400  
WD 13.68mm HFW 0.32mm Res 3072x2048 Dwell 4 $\mu$ s SEM4000X  
┌-20 $\mu$ m┐ ┌-20 $\mu$ m┐

Energy: 50 $\times$ 50

MarkSpeed:10 W

JumpSpeed:100 W

LineInterval:1

n:36

MarkInterval:1000

Scanned area: 179 $\mu$ m

divider:150

layers:2

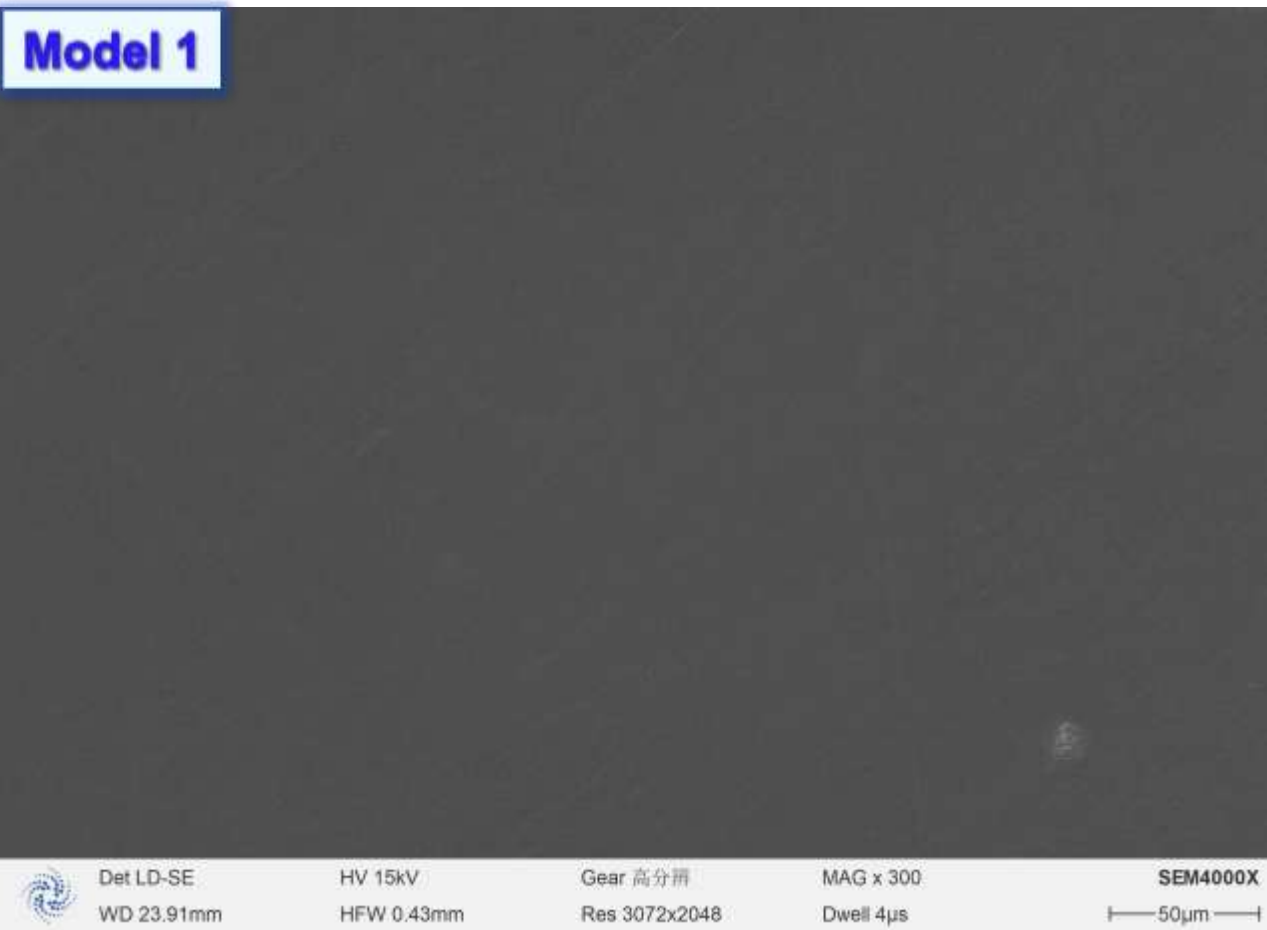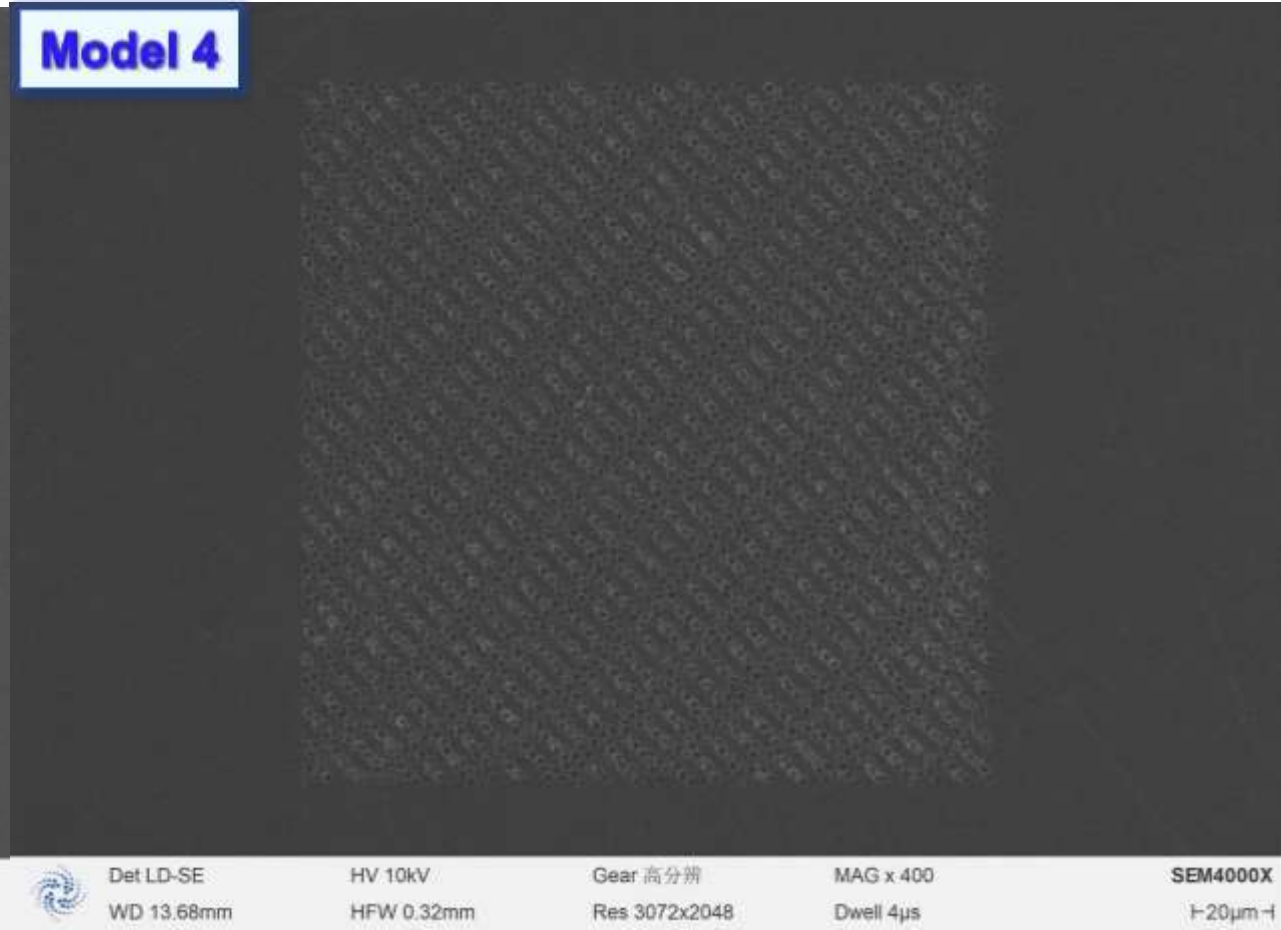

Energy: 50 $\times$ 50

MarkSpeed:10 W

JumpSpeed:100 W

LineInterval:1

n:36

MarkInterval:1000

Scanned area: 179 $\mu$ m

divider:150

layers:20

Model 1

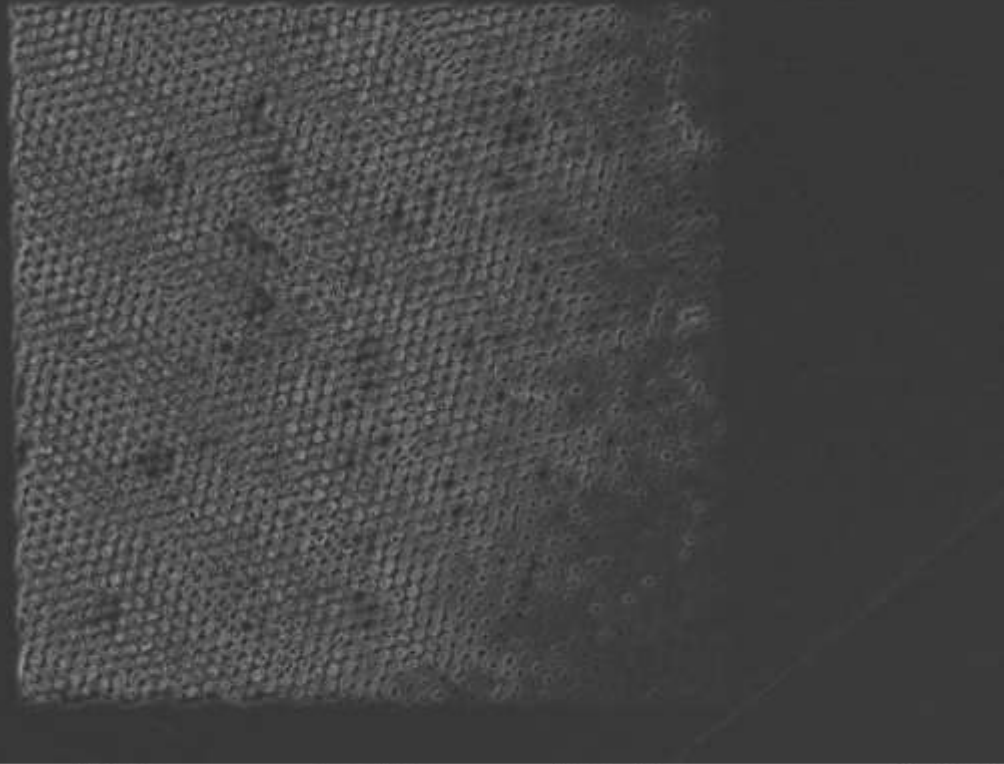

Model 4

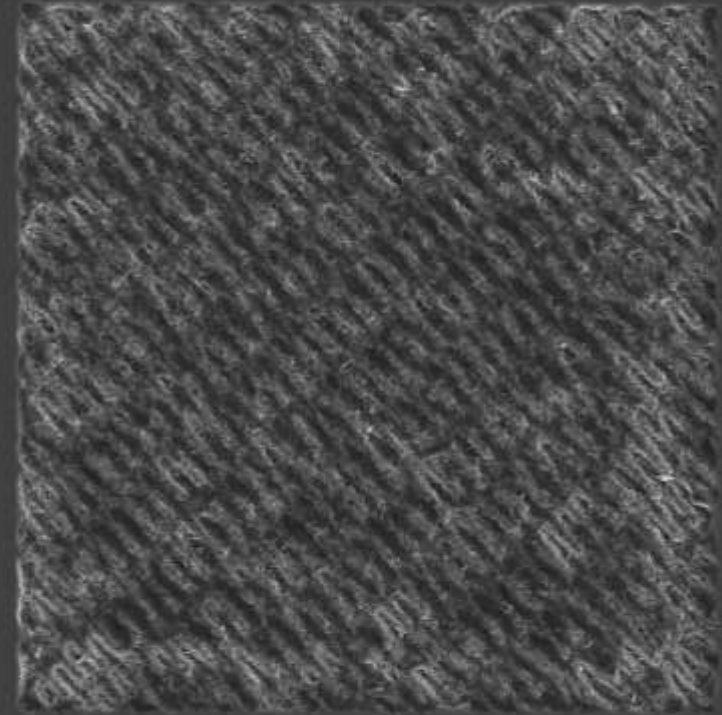

Det LD-SE HV 15kV Gear 高分辨 MAG x 400 SEM4000X  
WD 23.67mm HFW 0.32mm Res 3072x2048 Dwell 4 $\mu$ s 20 $\mu$ m

Det LD-SE HV 10kV Gear 高分辨 MAG x 400 SEM4000X  
WD 13.79mm HFW 0.32mm Res 3072x2048 Dwell 4 $\mu$ s 20 $\mu$ m

Energy: 50 $\times$ 50

MarkSpeed:10 W

JumpSpeed:100 W

LineInterval:1

n:36

MarkInterval:1000

Scanned area: 179 $\mu$ m

divider:150

layers:40

Model 1

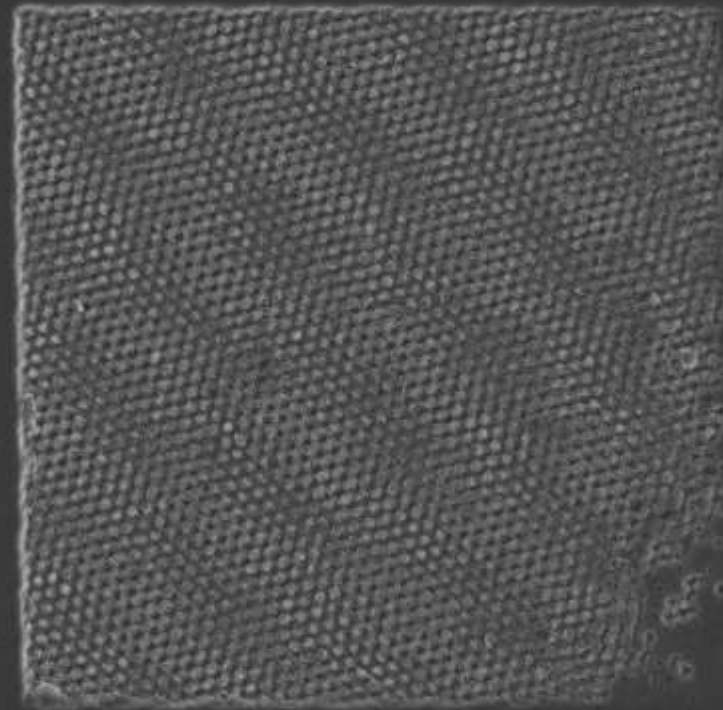

Model 4

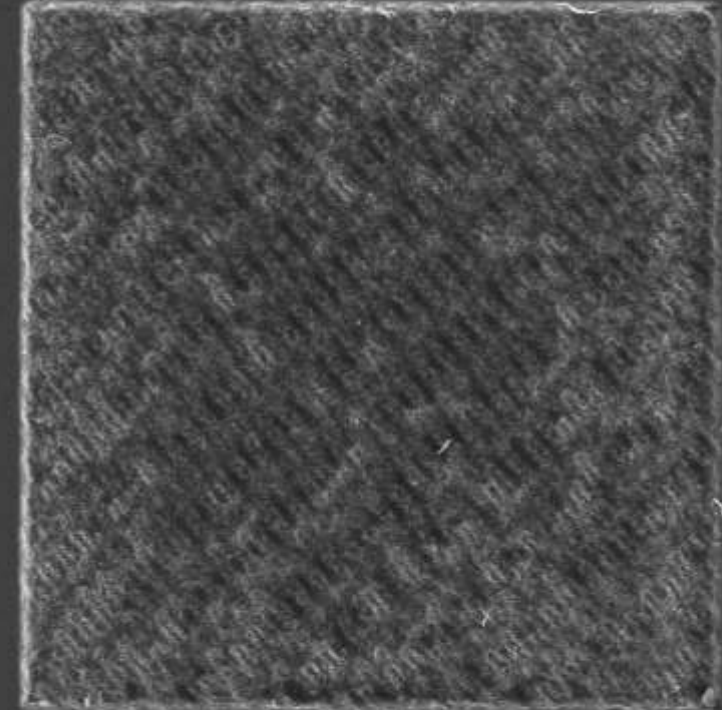

Det LD-SE HV 15kV Gear 高分辨 MAG x 400 SEM4000X  
WD 23.67mm HFW 0.32mm Res 3072x2048 Dwell 4 $\mu$ s  $\pm$ 20 $\mu$ m $\pm$

Det LD-SE HV 10kV Gear 高分辨 MAG x 400 SEM4000X  
WD 13.86mm HFW 0.32mm Res 3072x2048 Dwell 4 $\mu$ s  $\pm$ 20 $\mu$ m $\pm$

Energy: 50 $\times$ 50

MarkSpeed:10 W

JumpSpeed:100 W

LineInterval:1

n:36

MarkInterval:1000
