# Supplementary material
Source: Royal Society of Chemistry journal article supplement (doi:10.1039/d6ja00088f)
Supplement: d6ja00088f2.pdf [file d6ja00088f2.pdf]

## Supporting Information

### Development and application of a Raster-spot model in Galvo-*fs*LA-ICP-MS for precise trace-element and U-Pb isotopic analysis

Deng-Fei Duan<sup>\*a</sup>, Qi-Rong Duan<sup>a#</sup>, Hai-Long, Cao<sup>a</sup>, Chang-Xin Yin<sup>a</sup>, Ao-Di, Lu<sup>b</sup>, **Jing Wu<sup>\*a</sup>**, Xiao-Ping Xia<sup>a</sup>, Feng Guo<sup>a</sup>, Yan-Jie Tang<sup>a</sup>, Yue Wu<sup>a</sup>, Ping Yang<sup>a</sup>, Jun-Qin Wang<sup>c</sup>, Ling Yu<sup>a</sup>, Wen-Ting Yang<sup>a</sup>

a YU-CUGW Joint Research Center on Deep Earth and Surface Dynamic Coupling, College of Resources and Environment, Yangtze University, Wuhan 430100, PR China

b Shanghai Chemlab Instrument Co., Ltd., Wuhan 430074, China

c China University of Geoscience (Beijing), Beijing 100083, China

# Research Assistant

\* Corresponding authors

## Table of Contents

|                                                                                                                                                                                                                                                                                                                                                                                                                                                                                                                                                                                                                                                                                                                                                                                                                                                                                                                                                                                                                                                                                                                                                                                                                                                                                                                            |     |
|----------------------------------------------------------------------------------------------------------------------------------------------------------------------------------------------------------------------------------------------------------------------------------------------------------------------------------------------------------------------------------------------------------------------------------------------------------------------------------------------------------------------------------------------------------------------------------------------------------------------------------------------------------------------------------------------------------------------------------------------------------------------------------------------------------------------------------------------------------------------------------------------------------------------------------------------------------------------------------------------------------------------------------------------------------------------------------------------------------------------------------------------------------------------------------------------------------------------------------------------------------------------------------------------------------------------------|-----|
| <b>1. Experimental</b> .....                                                                                                                                                                                                                                                                                                                                                                                                                                                                                                                                                                                                                                                                                                                                                                                                                                                                                                                                                                                                                                                                                                                                                                                                                                                                                               | S3  |
| <b>2. Table S1</b> Instruments parameters for trace elements analysis and U-Pb dating by the Galvo-fsLA-ICP-MS .....                                                                                                                                                                                                                                                                                                                                                                                                                                                                                                                                                                                                                                                                                                                                                                                                                                                                                                                                                                                                                                                                                                                                                                                                       | S5  |
| <b>3. Table S2</b> Laser ablation parameters for trace element analysis and U-Pb dating, Divider-frequency divider .....                                                                                                                                                                                                                                                                                                                                                                                                                                                                                                                                                                                                                                                                                                                                                                                                                                                                                                                                                                                                                                                                                                                                                                                                   | S6  |
| <b>4. Table S3</b> U-Pb dating: mineral-specific laser parameters (Frequency-divider model), Divider-frequency divider .....                                                                                                                                                                                                                                                                                                                                                                                                                                                                                                                                                                                                                                                                                                                                                                                                                                                                                                                                                                                                                                                                                                                                                                                               | S8  |
| <b>5. PowerPoint document</b> Comparison of SEM images of ablation craters obtained on NIST SRM 610 using the Dense-fill model, Frequency-divider model, and Raster spot model under different parameter conditions (laser conditions: energy: $\sim 0.252\mu\text{J}$ ; mark-speed: $10^5 \mu\text{m/s}$ ; jump-speed: $10^6 \mu\text{m/s}$ ; line interval: $1 \mu\text{m}$ ; mark interval: 1000 ms; <b>number of lines ablated per times (n)for Raster-spot model: 3 (5<math>\mu\text{m}</math>), 8 (15 <math>\mu\text{m}</math>), 7 (20 <math>\mu\text{m}</math>), 11 (32 <math>\mu\text{m}</math>), 15 (44 <math>\mu\text{m}</math>), 18 (53 <math>\mu\text{m}</math>), 36 (179 <math>\mu\text{m}</math>)</b> .....                                                                                                                                                                                                                                                                                                                                                                                                                                                                                                                                                                                                  | S9  |
| <b>6. Figure. S1</b> Transient signal intensity of ${}^7\text{Li}$ , ${}^9\text{Be}$ , ${}^{23}\text{Na}$ , ${}^{24}\text{Mg}$ , ${}^{27}\text{Al}$ , ${}^{43}\text{Ca}$ , ${}^{47}\text{Ti}$ , ${}^{51}\text{V}$ , ${}^{57}\text{Fe}$ , ${}^{59}\text{Co}$ , ${}^{60}\text{Ni}$ , ${}^{71}\text{Ga}$ , ${}^{85}\text{Rb}$ , ${}^{88}\text{Sr}$ , ${}^{90}\text{Zr}$ , ${}^{93}\text{Nb}$ , ${}^{95}\text{Mo}$ , ${}^{121}\text{Sb}$ , ${}^{133}\text{Cs}$ , ${}^{137}\text{Ba}$ , ${}^{139}\text{La}$ , ${}^{140}\text{Ce}$ , ${}^{141}\text{Pr}$ , ${}^{146}\text{Nd}$ , ${}^{147}\text{Sm}$ , ${}^{153}\text{Eu}$ , ${}^{157}\text{Gd}$ , ${}^{159}\text{Tb}$ , ${}^{163}\text{Dy}$ , ${}^{165}\text{Ho}$ , ${}^{166}\text{Er}$ , ${}^{169}\text{Tm}$ , ${}^{172}\text{Yb}$ , ${}^{175}\text{Lu}$ , ${}^{178}\text{Hf}$ , and ${}^{182}\text{W}$ in NIST SRM 610 obtained using the Dense-fill model (laser conditions: spot size: $34.5 \mu\text{m}$ ; energy: $\sim 0.200 \mu\text{J}$ ; frequency divider: 1; mark-speed: $10^6 \mu\text{m/s}$ , jump speed: $10^6 \mu\text{m/s}$ , line interval: $1 \mu\text{m}$ , layers: 100; mark interval: 1000 ms), Frequency-divider model, and Raster spot model. with the laser parameters for the Frequency-divider model and Raster-spot models listed in Table S2A..... | S10 |
| <b>7. Figure. S2</b> Long-term measurements of reference materials for U-Pb dating, with laser parameters listed in Table S2B, C and Table S3. ....                                                                                                                                                                                                                                                                                                                                                                                                                                                                                                                                                                                                                                                                                                                                                                                                                                                                                                                                                                                                                                                                                                                                                                        | S15 |
| <b>8. Figure. S3</b> Concordia diagrams of U-Pb dating for Zircon (a), Rutile (b), Apatite (c), Allanite(d), monazite (e) and titanite (f) obtained using the Raster-spot model.....                                                                                                                                                                                                                                                                                                                                                                                                                                                                                                                                                                                                                                                                                                                                                                                                                                                                                                                                                                                                                                                                                                                                       | S17 |
| <b>9. Reference</b> .....                                                                                                                                                                                                                                                                                                                                                                                                                                                                                                                                                                                                                                                                                                                                                                                                                                                                                                                                                                                                                                                                                                                                                                                                                                                                                                  | S18 |

## **Experimental**

### **Reagents and reference Materials**

This experiment employed a series of mineral reference materials to evaluate the performance of a newly developed galvanometer femtosecond laser system utilizing a raster-spot model. These reference materials encompass various minerals, including zircon, apatite, monazite, rutile, and allanite. Their U-Pb ages have been precisely determined by isotope dilution thermal ionization mass spectrometry (ID-TIMS), and they exhibit a wide range of U contents, which makes them suitable for validating the analytical precision and accuracy of the laser ablation system.

For age calibration, corresponding external standards were applied to each mineral: 91500 for zircon, MAD2 for apatite, RW-1 for monazite, RMJG for rutile, and AMK for allanite. During the analytical session, each external standard was inserted and measured twice after every 5-10 unknown samples to correct for elemental fractionation and instrumental mass bias.

### **Trace element determinations and in-situ zircon U-Pb dating**

Prior to laser connection, the stability and sensitivity of the ICP-MS were optimized using a tuning solution (containing  ${}^6\text{Li}$ ,  ${}^{59}\text{Co}$ ,  ${}^{89}\text{Y}$ ,  ${}^{115}\text{In}$ , and  ${}^{205}\text{Tl}$  at  $1\text{ ng}\cdot\text{g}^{-1}$ ) in solution nebulizer mode. Laser parameters, including energy, frequency divider (F), Mark-speed, Jump-speed, number of layers, number of lines ablated per times (n), interval time, and spot size, were adjusted according to the specific samples. n define the number of scanning lines per sub-cycle within a single layer, while interval time refers to the pause between consecutive sub-cycles. During laser ablation, the sample cell was continuously flushed with high-purity helium, and the resulting aerosol was mixed with argon and nitrogen. In laser sampling mode, helium (99.999 % purity,  $0.4\text{ L}\cdot\text{min}^{-1}$  for raster-spot model;  $0.58\text{ L}\cdot\text{min}^{-1}$  for frequency-divider model) was used as the ablation carrier gas to enhance aerosol transport efficiency and signal intensity, while nitrogen was introduced to further improve signal sensitivity. The aerosol passed through a signal-smoothing device before entering the ICP-MS<sup>1</sup>. Each measurement sequence consisted of three stages: approximately 15 s of gas blank acquisition with the laser off, about 50 s of sample signal acquisition with the laser on, and a 30 s washout period. Calibration was performed using NIST SRM 610, GSE-2G, and GSC-2G as external standards, while reference glasses OA-1, OH-1, OJY-1, BHVO-2G, and NKT-1G were analyzed as unknown samples. Silicon ( ${}^{29}\text{Si}$ ) was used as the internal standard, with recommended values obtained from the GeoRem database (<http://georem.mpch-mainz.gwdg.de>). Detailed parameters and conditions of the instrument listed in [Table S1](#) and [Table S2](#).

For U-Pb dating analysis, the sample cell and gas pathway were purged with high-purity argon (Ar) and helium (He) prior to measurement to reduce common lead (Pb) contamination. The total acquisition time for each analysis point was approximately 90 s, consisting of three stages: about 15 s of gas blank acquisition with the laser off, about 45 s of sample signal acquisition with the laser on, and a subsequent 30 s washout period. Laser ablation was performed using the Raster-spot model. The ablated aerosol was carried out of the ablation cell by helium (flow rate  $\sim 0.4 \text{ L}\cdot\text{min}^{-1}$ ), then mixed with argon ( $\sim 1.0 \text{ L}\cdot\text{min}^{-1}$ ) and nitrogen ( $\sim 0.004 \text{ L}\cdot\text{min}^{-1}$ ), homogenized through a signal-smoothing device<sup>1</sup>, and finally introduced into the inductively coupled plasma mass spectrometer (ICP-MS) for analysis. The data were calibrated using corresponding reference materials. Age uncertainties and the concordance MSWD were calculated using the IsoplotR online module. Detailed parameters and conditions of the instrument listed in [Table S1](#); [Table S2](#) and [Table S3](#)

**Table S1** Instruments parameters for trace elements analysis and U-Pb dating by the Galvo-fsLA-ICP-MS.

|                              |                                                                                                                                                                                                                                                                                                                                                                                                                                                                                                                                                                                                                                                                                                                                                                                                                                                             |
|------------------------------|-------------------------------------------------------------------------------------------------------------------------------------------------------------------------------------------------------------------------------------------------------------------------------------------------------------------------------------------------------------------------------------------------------------------------------------------------------------------------------------------------------------------------------------------------------------------------------------------------------------------------------------------------------------------------------------------------------------------------------------------------------------------------------------------------------------------------------------------------------------|
| Laser ablation system        | Galvo-fsLA (Raster-spot model)                                                                                                                                                                                                                                                                                                                                                                                                                                                                                                                                                                                                                                                                                                                                                                                                                              |
| Model                        | GenesisGEO                                                                                                                                                                                                                                                                                                                                                                                                                                                                                                                                                                                                                                                                                                                                                                                                                                                  |
| Laser                        | femtosecond                                                                                                                                                                                                                                                                                                                                                                                                                                                                                                                                                                                                                                                                                                                                                                                                                                                 |
| Power                        | 3.3 W                                                                                                                                                                                                                                                                                                                                                                                                                                                                                                                                                                                                                                                                                                                                                                                                                                                       |
| Wavelength                   | 343 nm                                                                                                                                                                                                                                                                                                                                                                                                                                                                                                                                                                                                                                                                                                                                                                                                                                                      |
| Pulse width                  | 259 fs                                                                                                                                                                                                                                                                                                                                                                                                                                                                                                                                                                                                                                                                                                                                                                                                                                                      |
| Repetition rate of the laser | 1000 KHz                                                                                                                                                                                                                                                                                                                                                                                                                                                                                                                                                                                                                                                                                                                                                                                                                                                    |
| Sampling mode                | Raster-spot ablation                                                                                                                                                                                                                                                                                                                                                                                                                                                                                                                                                                                                                                                                                                                                                                                                                                        |
| Carrier gas                  | He: ~0.4 L min <sup>-1</sup>                                                                                                                                                                                                                                                                                                                                                                                                                                                                                                                                                                                                                                                                                                                                                                                                                                |
| Sample gas                   | Ar: ~1.0 L min <sup>-1</sup> ; N <sub>2</sub> : ~0.004 L min <sup>-1</sup>                                                                                                                                                                                                                                                                                                                                                                                                                                                                                                                                                                                                                                                                                                                                                                                  |
| Background                   | 15s                                                                                                                                                                                                                                                                                                                                                                                                                                                                                                                                                                                                                                                                                                                                                                                                                                                         |
| Wash-out time                | 30s                                                                                                                                                                                                                                                                                                                                                                                                                                                                                                                                                                                                                                                                                                                                                                                                                                                         |
| Mass spectrometer            | Agilent 8900                                                                                                                                                                                                                                                                                                                                                                                                                                                                                                                                                                                                                                                                                                                                                                                                                                                |
| RF power                     | ~1500 W                                                                                                                                                                                                                                                                                                                                                                                                                                                                                                                                                                                                                                                                                                                                                                                                                                                     |
| Cool gas                     | Ar: ~15 L min <sup>-1</sup>                                                                                                                                                                                                                                                                                                                                                                                                                                                                                                                                                                                                                                                                                                                                                                                                                                 |
| Sample introduction          | Dry transport via 6 mm ID & 1 m length<br>PTFE tubing                                                                                                                                                                                                                                                                                                                                                                                                                                                                                                                                                                                                                                                                                                                                                                                                       |
| Interface cone               | Ni                                                                                                                                                                                                                                                                                                                                                                                                                                                                                                                                                                                                                                                                                                                                                                                                                                                          |
| Data acquired                | Time-resolved analysis                                                                                                                                                                                                                                                                                                                                                                                                                                                                                                                                                                                                                                                                                                                                                                                                                                      |
| Detector mode                | Pulse counting                                                                                                                                                                                                                                                                                                                                                                                                                                                                                                                                                                                                                                                                                                                                                                                                                                              |
| Mass acquired                | <sup>7</sup> Li, <sup>9</sup> Be, <sup>23</sup> Na, <sup>24</sup> Mg, <sup>27</sup> Al, <sup>29</sup> Si, <sup>43</sup> Ca, <sup>47</sup> Ti,<br><sup>51</sup> V, <sup>57</sup> Fe, <sup>59</sup> Co, <sup>60</sup> Ni, <sup>63</sup> Cu, <sup>66</sup> Zn, <sup>71</sup> Ga, <sup>85</sup> Rb,<br><sup>88</sup> Sr, <sup>90</sup> Zr, <sup>93</sup> Nb, <sup>95</sup> Mo, <sup>121</sup> Sb, <sup>133</sup> Cs, <sup>137</sup> Ba,<br><sup>139</sup> La, <sup>140</sup> Ce, <sup>141</sup> Pr, <sup>146</sup> Nd, <sup>147</sup> Sm, <sup>153</sup> Eu,<br><sup>157</sup> Gd, <sup>159</sup> Tb, <sup>163</sup> Dy, <sup>165</sup> Ho, <sup>166</sup> Er, <sup>169</sup> Tm,<br><sup>172</sup> Yb, <sup>175</sup> Lu, <sup>178</sup> Hf, <sup>182</sup> W, <sup>206</sup> Pb, <sup>207</sup> Pb, <sup>208</sup> Pb,<br><sup>232</sup> Th, <sup>238</sup> U |

**Table S2** Laser ablation parameters for trace element analysis and U-Pb dating, Divider-frequency divider**A. Trace element analysis: model comparison on glass reference materials**

| Model                   | Attenuator A×B | Energy (μJ) | Divider | Spot Size (μm) | MarkSpeed (μm/s) | JumpSpeed (μm/s) | LineInterval (μm) | Layers | n  | MarkInterval (ms) |
|-------------------------|----------------|-------------|---------|----------------|------------------|------------------|-------------------|--------|----|-------------------|
| Frequency-divider model | 45% × 45%      | ~0.200      | 100     | 34.5           | 40000            | 1000000          | 1.5               | 54     | —  | 1800              |
| Raster-spot model       | 45%×45%        | ~0.200      | 10      | 34.5           | 150000           | 1000000          | 1.5               | 24     | 12 | 1000              |

Note: A total of 42 isotopes were measured, each with a dwell time of 0.006 s.

**B. U-Pb dating: mineral-specific laser parameters (Raster-spot model only)**

| Mineral  | Attenuator A×B | Energy (μJ) | Divider | Spot Size (μm) | MarkSpeed (μm/s) | JumpSpeed (μm/s) | LineInterval (μm) | Layers | n  | MarkInterval (ms) |      |
|----------|----------------|-------------|---------|----------------|------------------|------------------|-------------------|--------|----|-------------------|------|
| Zircon   | 50% × 50%      | ~ 0.252     | 10      | 8.4            | 110000           | 1000000          | 1.2               | 16     | 4  | 700               |      |
|          |                |             |         | 10.8           | 120000           | 1000000          | 1.2               | 20     | 5  | 800               |      |
|          |                |             |         | 21             | 150000           | 1000000          | 1.5               | 16     | 5  | 900               |      |
|          |                |             |         | 30             | 150000           | 1000000          | 1.5               | 28     | 7  | 500               |      |
|          |                |             |         | 40             | 21               | 37500            | 1000000           | 1.5    | 26 | 5                 | 600  |
|          |                |             |         | 30             | 37500            | 1000000          | 1.5               | 28     | 7  | 500               |      |
| Apatite  | 46% × 46%      | ~ 0.210     | 10      | 15             | 150000           | 1000000          | 1.5               | 16     | 11 | 1200              |      |
|          |                |             |         | 30             | 150000           | 1000000          | 1.5               | 12     | 7  | 1100              |      |
|          |                |             |         | 39             | 150000           | 1000000          | 1.5               | 12     | 9  | 1100              |      |
|          |                |             |         | 40             | 39               | 37500            | 1000000           | 1.5    | 12 | 9                 | 1100 |
| Rutile   | 30% × 30%      | ~ 0.083     | 10      | 19             | 150000           | 1000000          | 1                 | 16     | 10 | 800               |      |
|          |                |             |         | 30             | 150000           | 1000000          | 1.5               | 28     | 7  | 500               |      |
| Allanite | 45% × 45%      | ~ 0.200     | 10      | 13.2           | 120000           | 1000000          | 1.2               | 12     | 4  | 1200              |      |
|          | 30% × 30%      | ~ 0.083     | 40      | 30             | 37500            | 1000000          | 1.5               | 20     | 7  | 750               |      |
| Titanite | 40% × 40%      | ~ 0.156     | 40      | 30             | 37500            | 1000000          | 1.5               | 14     | 7  | 1000              |      |
| Monazite | 34% × 34%      | ~ 0.109     | 40      | 13.5           | 37500            | 1000000          | 1.5               | 8      | 2  | 1000              |      |

Note: A total of 5 isotopes were measured, as listed below: <sup>206</sup>Pb, <sup>207</sup>Pb, <sup>208</sup>Pb, <sup>232</sup>Th, <sup>238</sup>U

**C. Dwell times of isotopes for U-Pb dating of different minerals (Raster-spot model only)**

| <b>Mineral</b> | <b>Spot Size (μm)</b> | <b>Dwell Time (s)</b>                                                                                                                        | <b>Mineral</b> | <b>Spot Size (μm)</b> | <b>Dwell Time (s)</b>                                                                                                                 |
|----------------|-----------------------|----------------------------------------------------------------------------------------------------------------------------------------------|----------------|-----------------------|---------------------------------------------------------------------------------------------------------------------------------------|
| Zircon         | 10.8                  | 0.03 s for <sup>206</sup> Pb; 0.06 s for <sup>207</sup> Pb; 0.006 s for <sup>208</sup> Pb and <sup>232</sup> Th; 0.01 s for <sup>238</sup> U | Zircon         | 8.4, 21, 30           | 0.015 s for <sup>206</sup> Pb and <sup>208</sup> Pb; 0.03 s for <sup>207</sup> Pb; 0.01 s for <sup>232</sup> Th and <sup>238</sup> U  |
| Apatite        | 15, 30, 39            | 0.03 s for <sup>206</sup> Pb, <sup>207</sup> Pb and <sup>238</sup> U; 0.006 s for <sup>208</sup> Pb and <sup>232</sup> Th                    | Apatite        | 22.8                  | 0.004 s for <sup>206</sup> Pb, <sup>208</sup> Pb and <sup>232</sup> Th; 0.02 s for <sup>207</sup> Pb; 0.007 s for <sup>238</sup> U    |
| Rutile         | 19, 30                | 0.03 s for <sup>206</sup> Pb, <sup>207</sup> Pb, <sup>208</sup> Pb <sup>232</sup> Th and <sup>238</sup> U                                    | Allanite       | 13.2, 30              | 0.03 s for <sup>206</sup> Pb, <sup>207</sup> Pb and <sup>238</sup> U; 0.003 s for <sup>208</sup> Pb and <sup>232</sup> Th             |
| Titanite       | 30                    | 0.015 s for <sup>206</sup> Pb and <sup>208</sup> Pb; 0.03 s for <sup>207</sup> Pb; 0.01 s for <sup>232</sup> Th and <sup>238</sup> U         | Monazite       | 13.5                  | 0.015 s for <sup>206</sup> Pb; 0.02 s for <sup>207</sup> Pb and <sup>208</sup> Pb; 0.015 s for <sup>232</sup> Th and <sup>238</sup> U |

**Table S3** U-Pb dating: mineral-specific laser parameters (Frequency-divider model), Divider-frequency divider

| Mineral | Attenuator A×B | Energy (μJ) | Divider | Spot Size (μm) | MarkSpeed (μm/s) | JumpSpeed (μm/s) | LineInterval (μm) | Layers | MarkInterval (ms) |
|---------|----------------|-------------|---------|----------------|------------------|------------------|-------------------|--------|-------------------|
| Zircon  | 47% × 47%      | ~ 0.220     | 200     | 15             | 60000            | 1000000          | 2                 | 320    | 250               |
|         | 50% × 50%      | ~ 0.252     | 200     | 15             | 60000            | 1000000          | 2                 | 320    | 250               |
|         | 46% × 46%      | ~ 0.210     | 40      | 20             | 200000           | 1000000          | 2                 | 200    | 500               |
|         | 50% × 50%      | ~ 0.252     | 120     | 20             | 60000            | 1000000          | 3                 | 320    | 250               |
|         | 47% × 47%      | ~ 0.220     | 200     | 20             | 60000            | 1000000          | 2                 | 350    | 250               |
|         | 50% × 50%      | ~ 0.252     | 200     | 20             | 60000            | 1000000          | 2                 | 320    | 250               |
|         | 47% × 47%      | ~ 0.220     | 40      | 30             | 400000           | 1000000          | 2                 | 200    | 500               |
|         | 55% × 55%      | ~ 0.302     | 40      | 30             | 200000           | 1000000          | 2                 | 200    | 500               |
|         | 50% × 50%      | ~ 0.252     | 120     | 30             | 60000            | 1000000          | 3                 | 320    | 250               |
|         | 47% × 47%      | ~ 0.220     | 200     | 200            | 30               | 60000            | 1000000           | 2      | 350               |

**PowerPoint document** Comparison of SEM images of ablation craters obtained on NIST SRM 610 using the Dense-fill model, Frequency-divider model, and Raster spot model under different parameter conditions (laser conditions: energy:  $\sim 0.252 \mu\text{J}$ ; mark-speed:  $10^5 \mu\text{m/s}$ ; jump-speed:  $10^6 \mu\text{m/s}$ ; line interval:  $1 \mu\text{m}$ ; mark interval:  $1000 \text{ ms}$ ; **number of lines ablated per times (n)for Raster-spot model: 3 ( $5 \mu\text{m}$ ), 8 ( $15 \mu\text{m}$ ), 7 ( $20 \mu\text{m}$ ), 11 ( $32 \mu\text{m}$ ), 15 ( $44 \mu\text{m}$ ), 18 ( $53 \mu\text{m}$ ), 36 ( $179 \mu\text{m}$ )**)

**Figure. S1** Transient signal intensity of  ${}^7\text{Li}$ ,  ${}^9\text{Be}$ ,  ${}^{23}\text{Na}$ ,  ${}^{24}\text{Mg}$ ,  ${}^{27}\text{Al}$ ,  ${}^{43}\text{Ca}$ ,  ${}^{47}\text{Ti}$ ,  ${}^{51}\text{V}$ ,  ${}^{57}\text{Fe}$ ,  ${}^{59}\text{Co}$ ,  ${}^{60}\text{Ni}$ ,  ${}^{71}\text{Ga}$ ,  ${}^{85}\text{Rb}$ ,  ${}^{88}\text{Sr}$ ,  ${}^{90}\text{Zr}$ ,  ${}^{93}\text{Nb}$ ,  ${}^{95}\text{Mo}$ ,  ${}^{121}\text{Sb}$ ,  ${}^{133}\text{Cs}$ ,  ${}^{137}\text{Ba}$ ,  ${}^{139}\text{La}$ ,  ${}^{140}\text{Ce}$ ,  ${}^{141}\text{Pr}$ ,  ${}^{146}\text{Nd}$ ,  ${}^{147}\text{Sm}$ ,  ${}^{153}\text{Eu}$ ,  ${}^{157}\text{Gd}$ ,  ${}^{159}\text{Tb}$ ,  ${}^{163}\text{Dy}$ ,  ${}^{165}\text{Ho}$ ,  ${}^{166}\text{Er}$ ,  ${}^{169}\text{Tm}$ ,  ${}^{172}\text{Yb}$ ,  ${}^{175}\text{Lu}$ ,  ${}^{178}\text{Hf}$ , and  ${}^{182}\text{W}$  in NIST SRM 610 obtained using the Dense-fill model (laser conditions: spot size: 34.5  $\mu\text{m}$ ; energy:  $\sim 0.200 \mu\text{J}$ ; frequency divider: 1; mark-speed:  $10^6 \mu\text{m/s}$ , jump speed:  $10^6 \mu\text{m/s}$ , line interval: 1  $\mu\text{m}$ , layers: 100; mark interval: 1000 ms), Frequency-divider model and Raster-spot model. Parameters for Frequency-divider model and Raster-spot model were listed in [Table S2A](#)

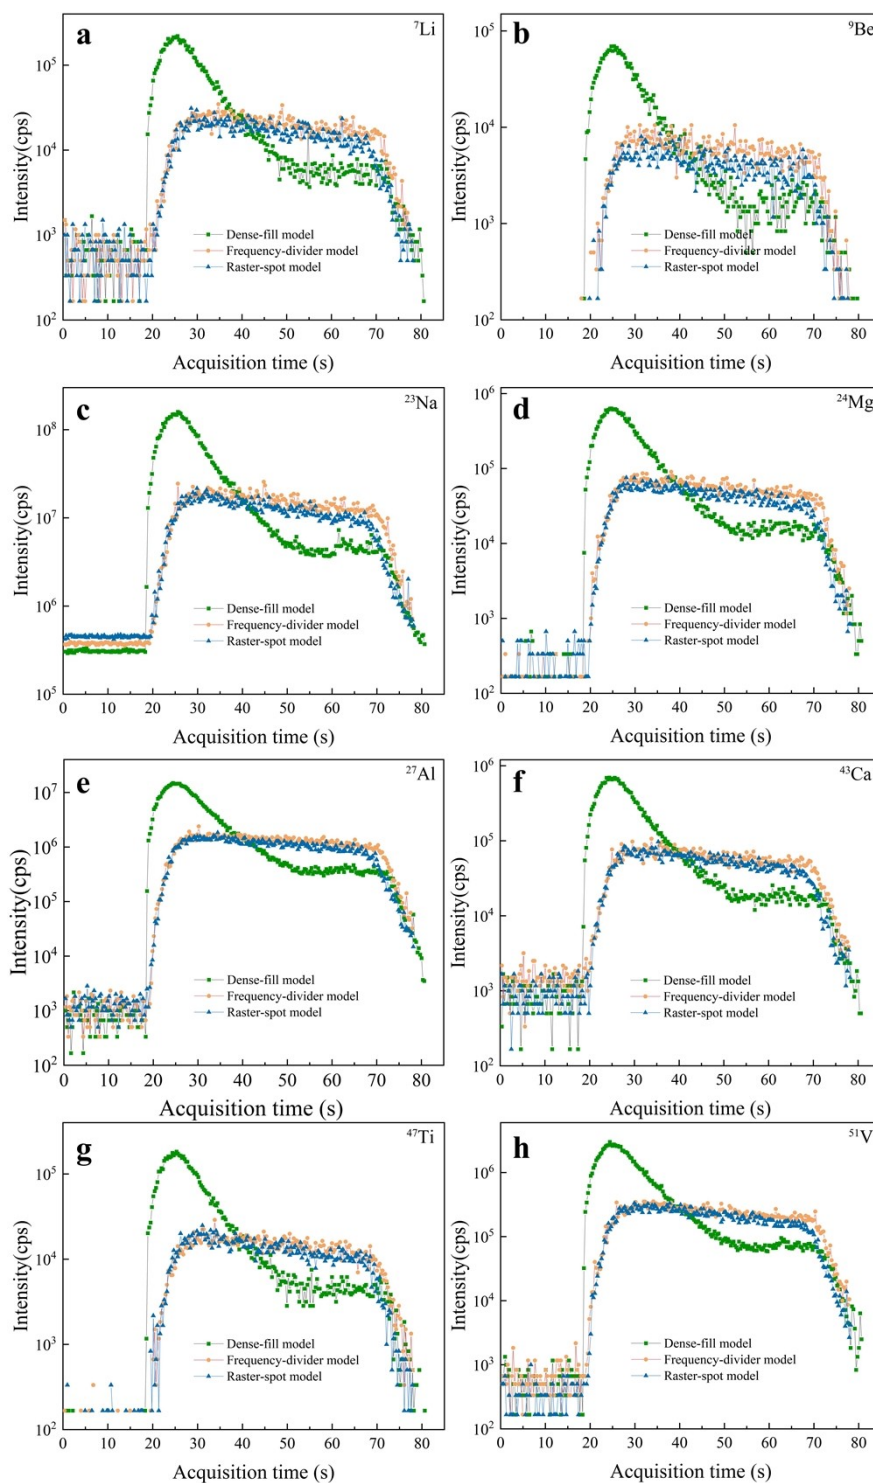

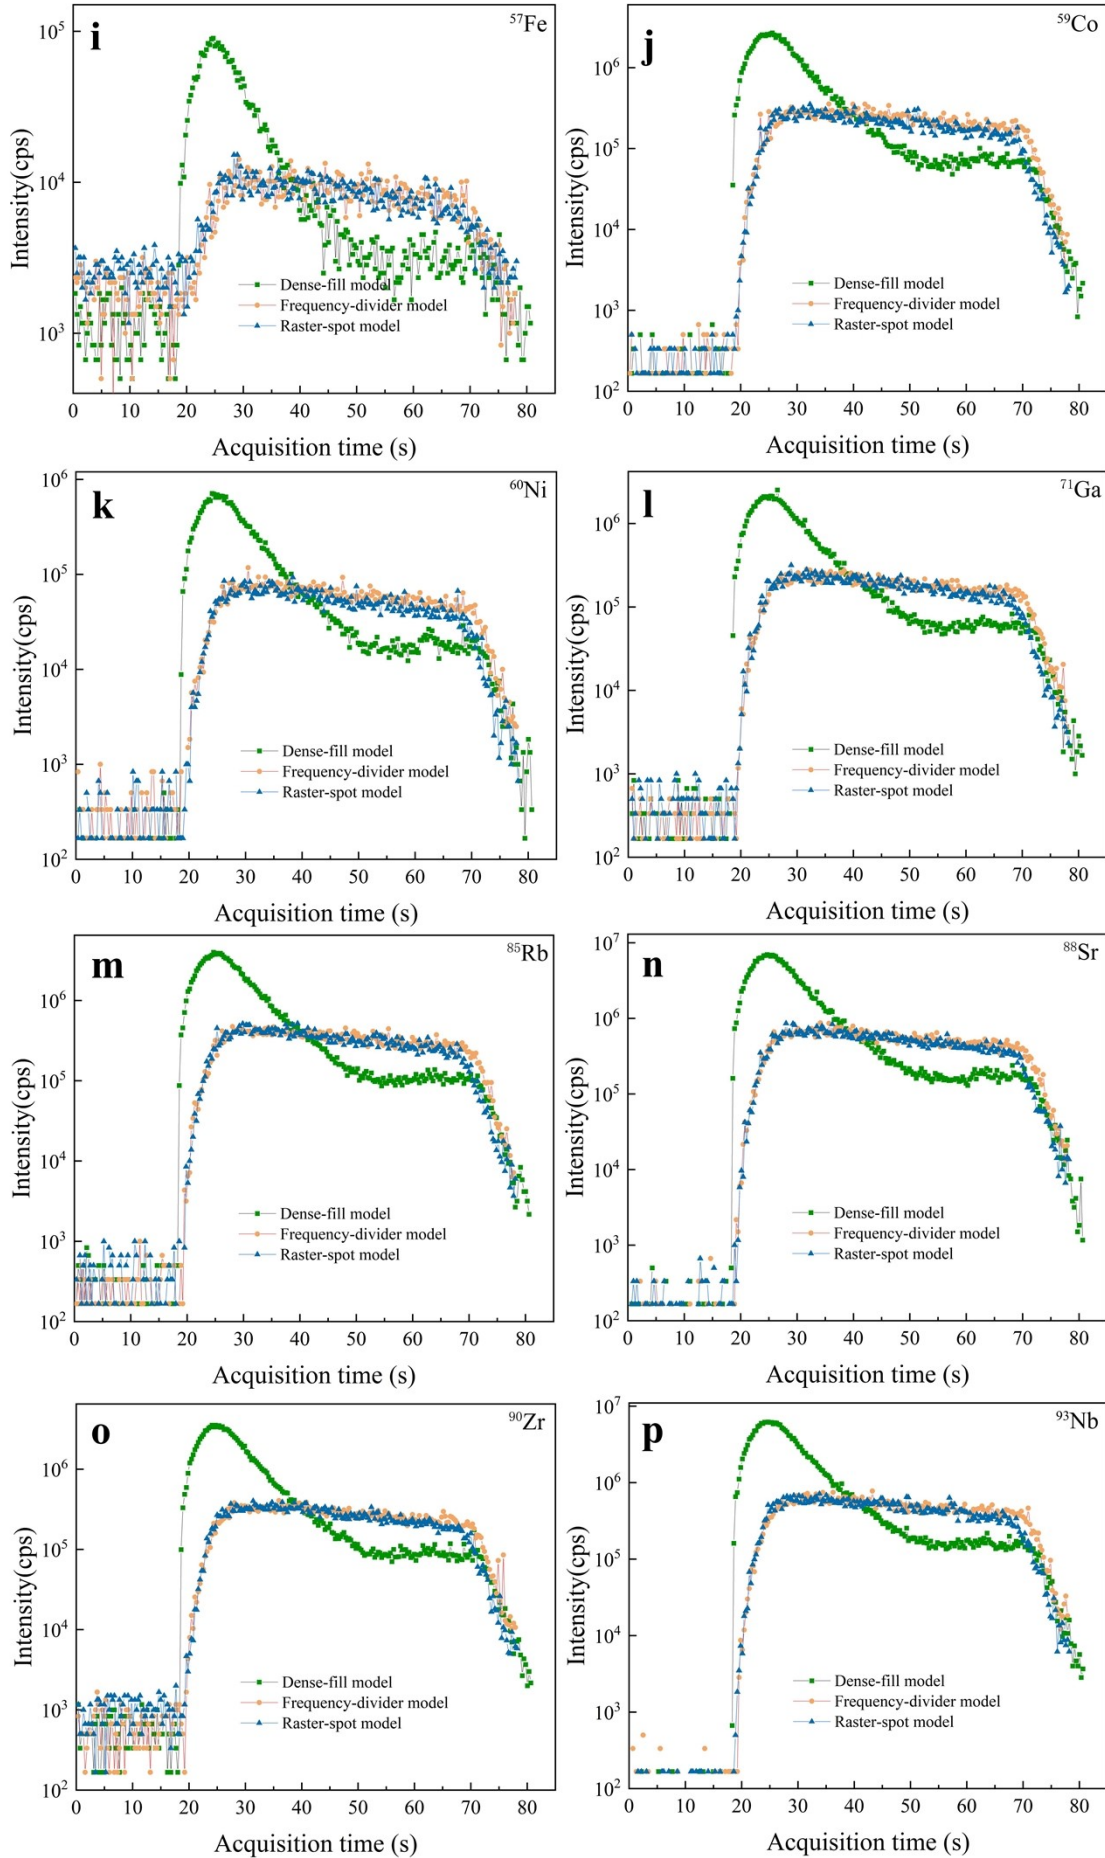

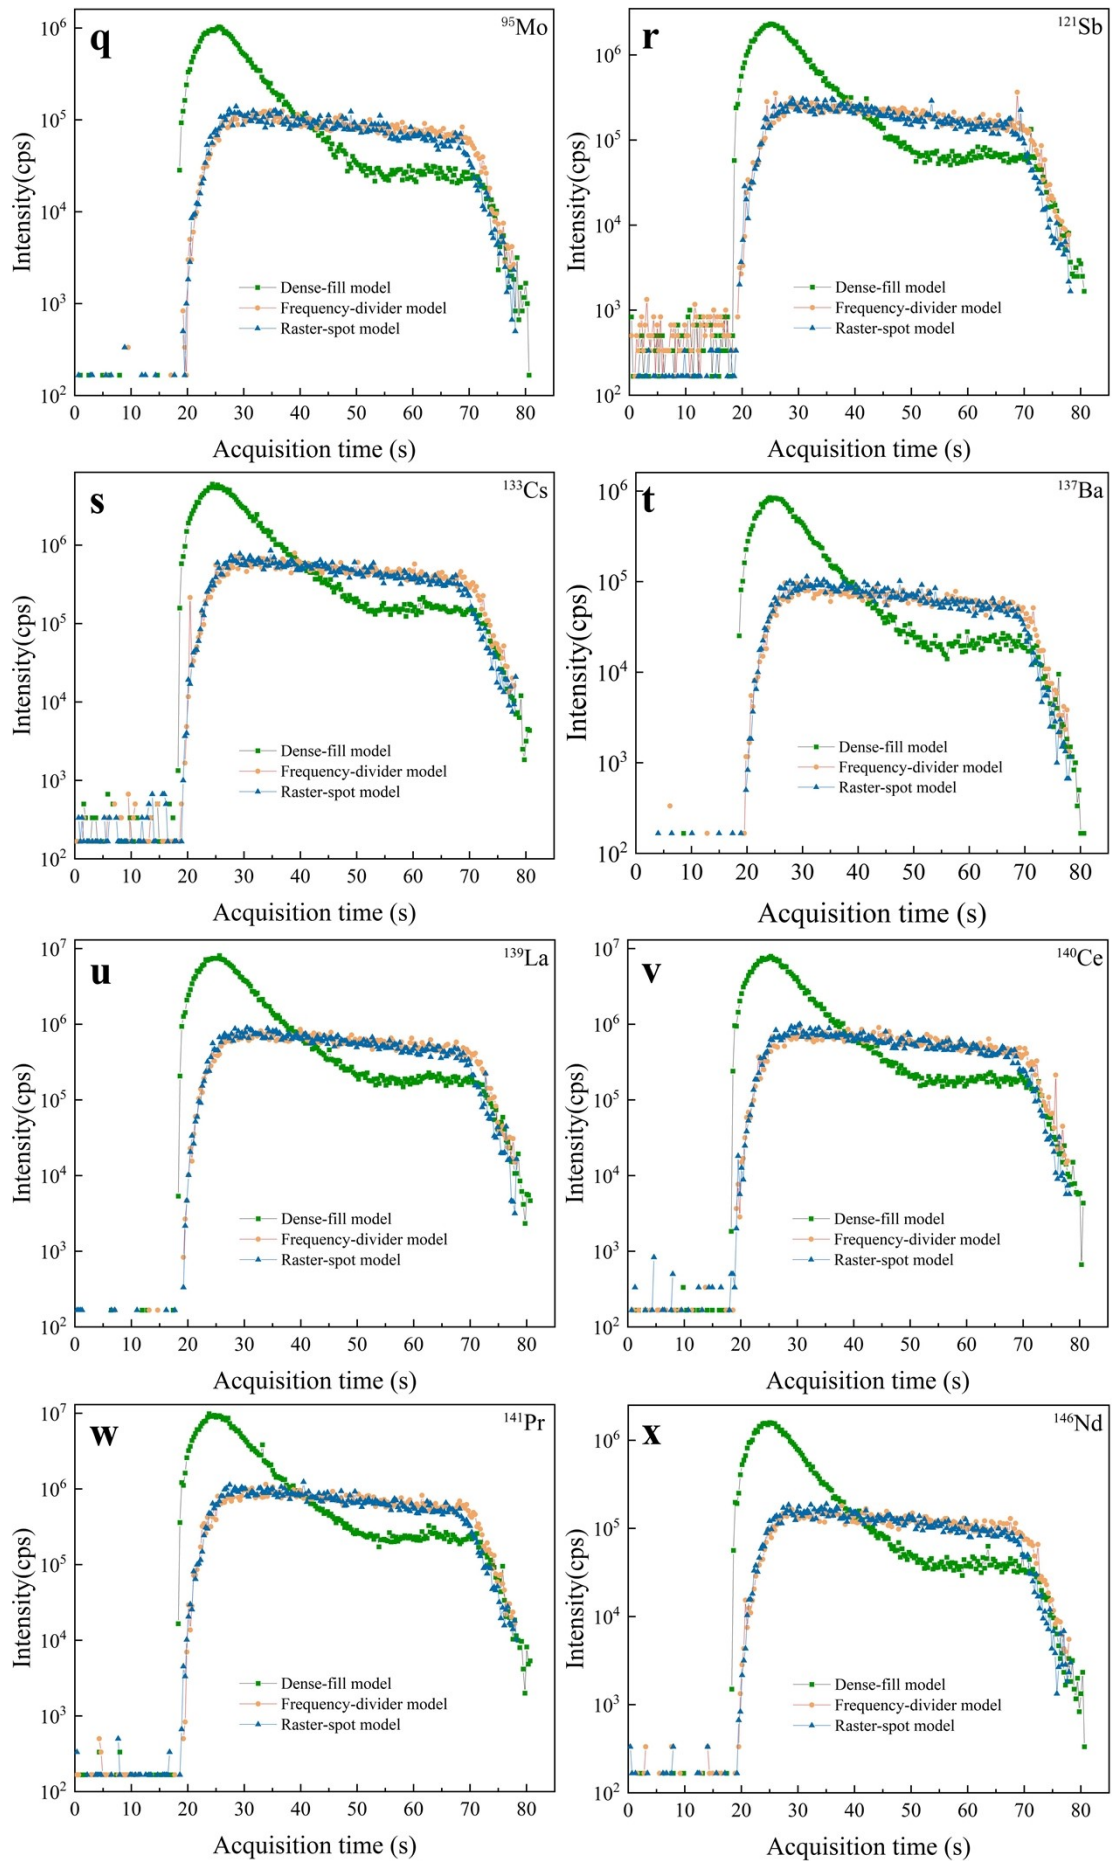

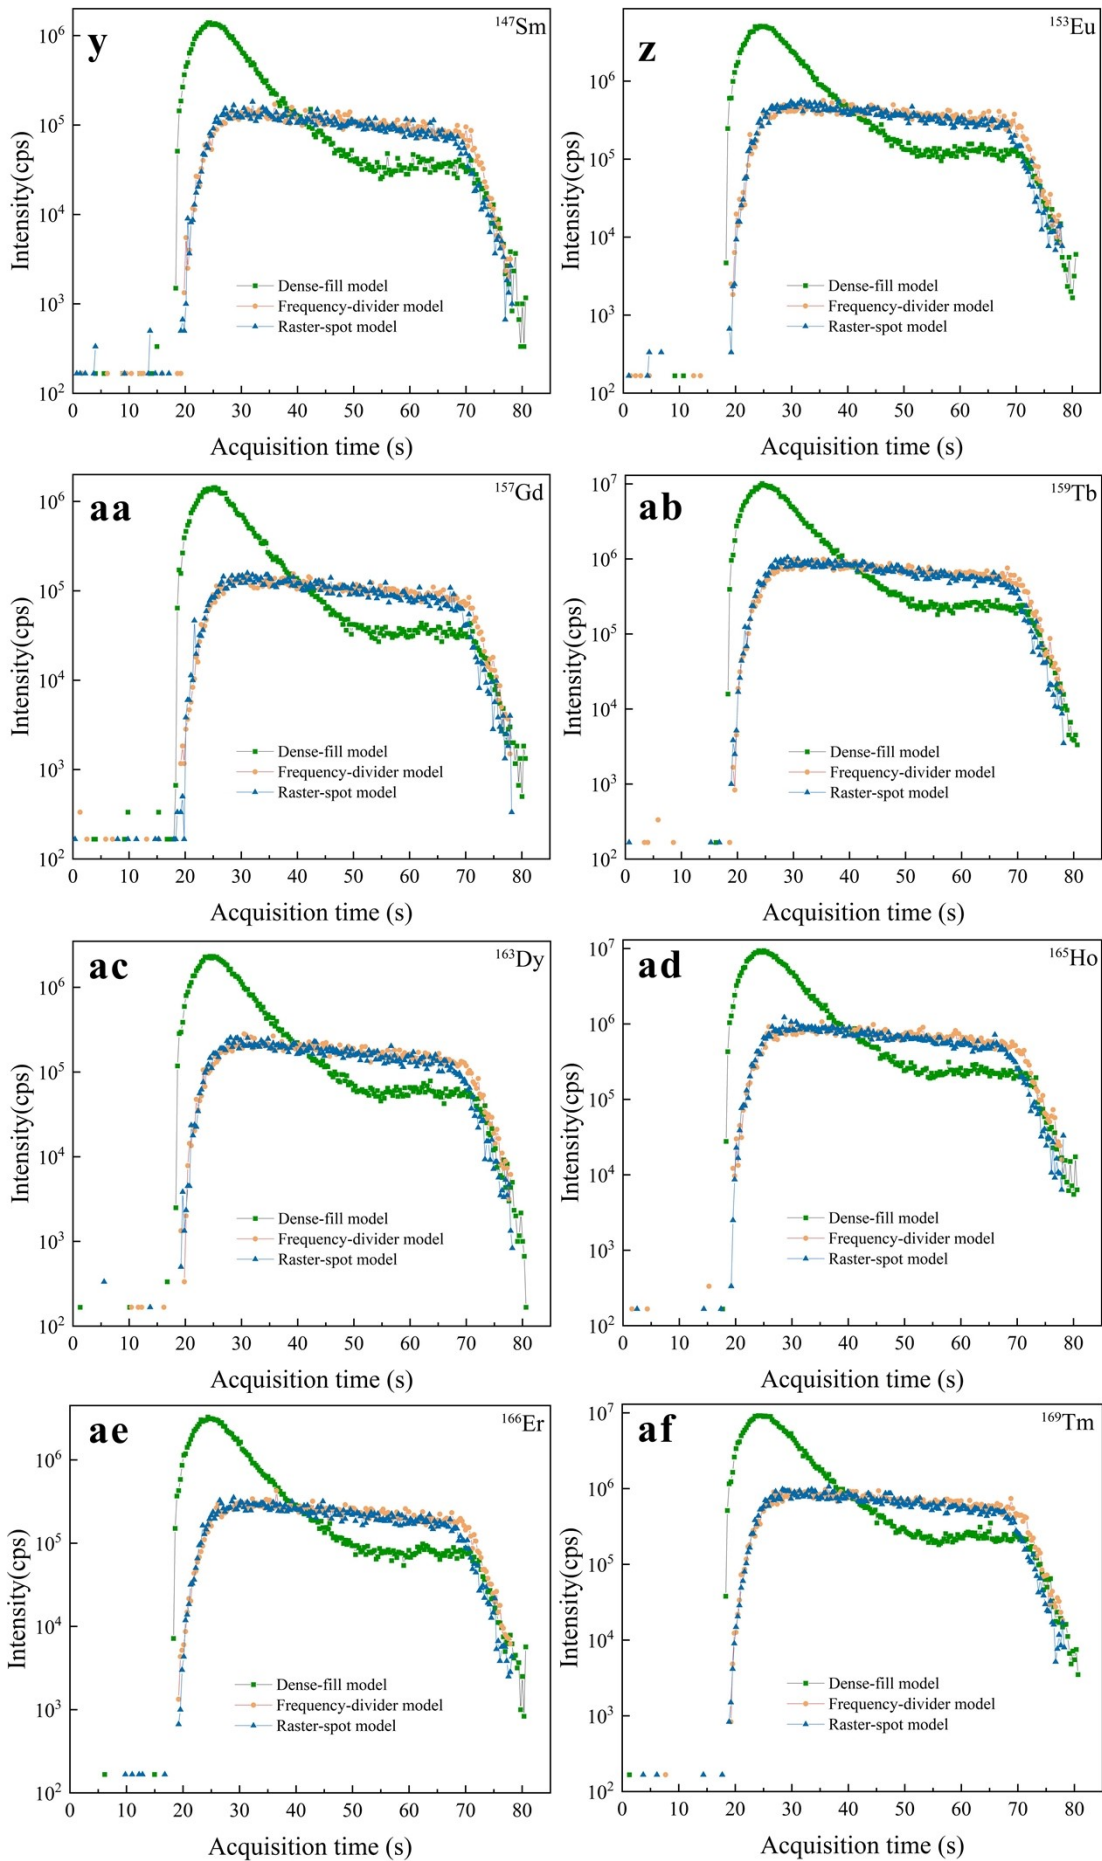

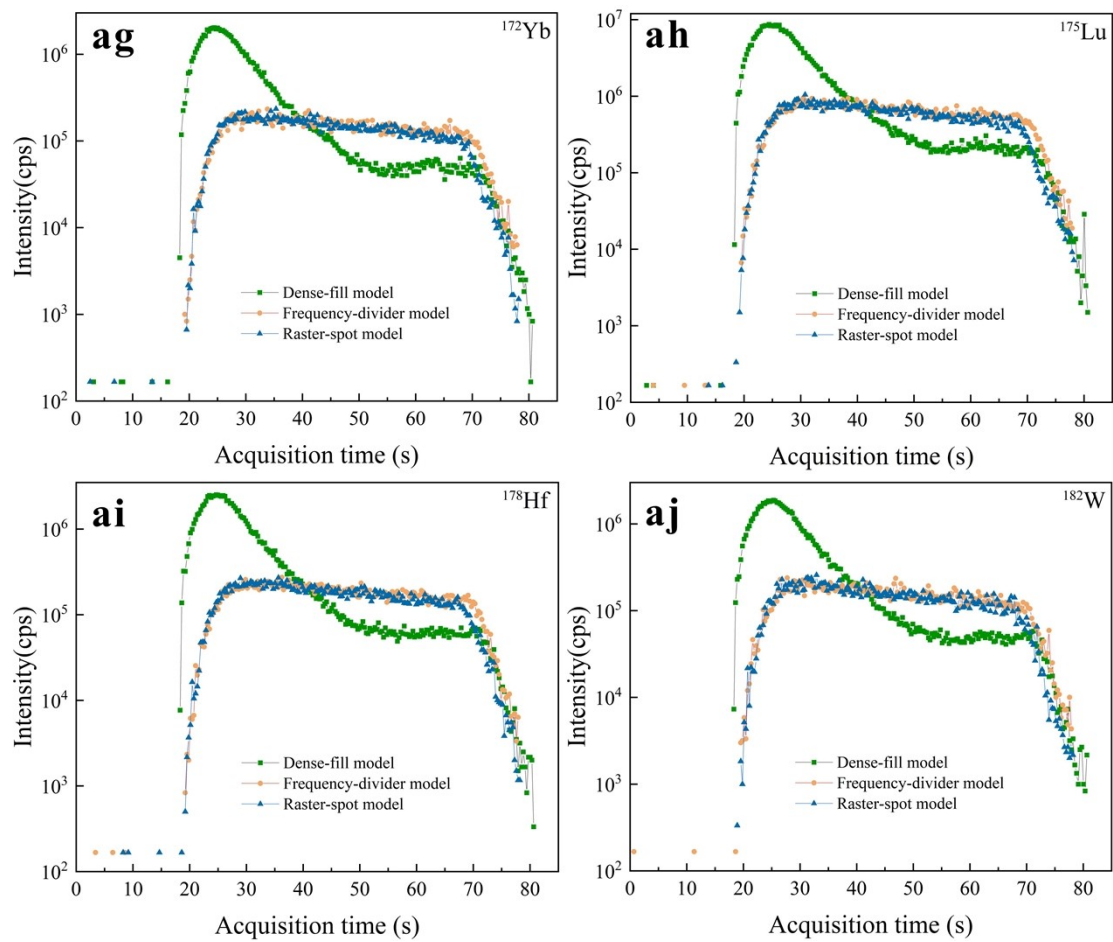

**Figure. S2** Long-term measurements of reference materials during U-Pb dating, with laser parameters listed in [Table S2B](#), [C](#) and [Table S3](#)

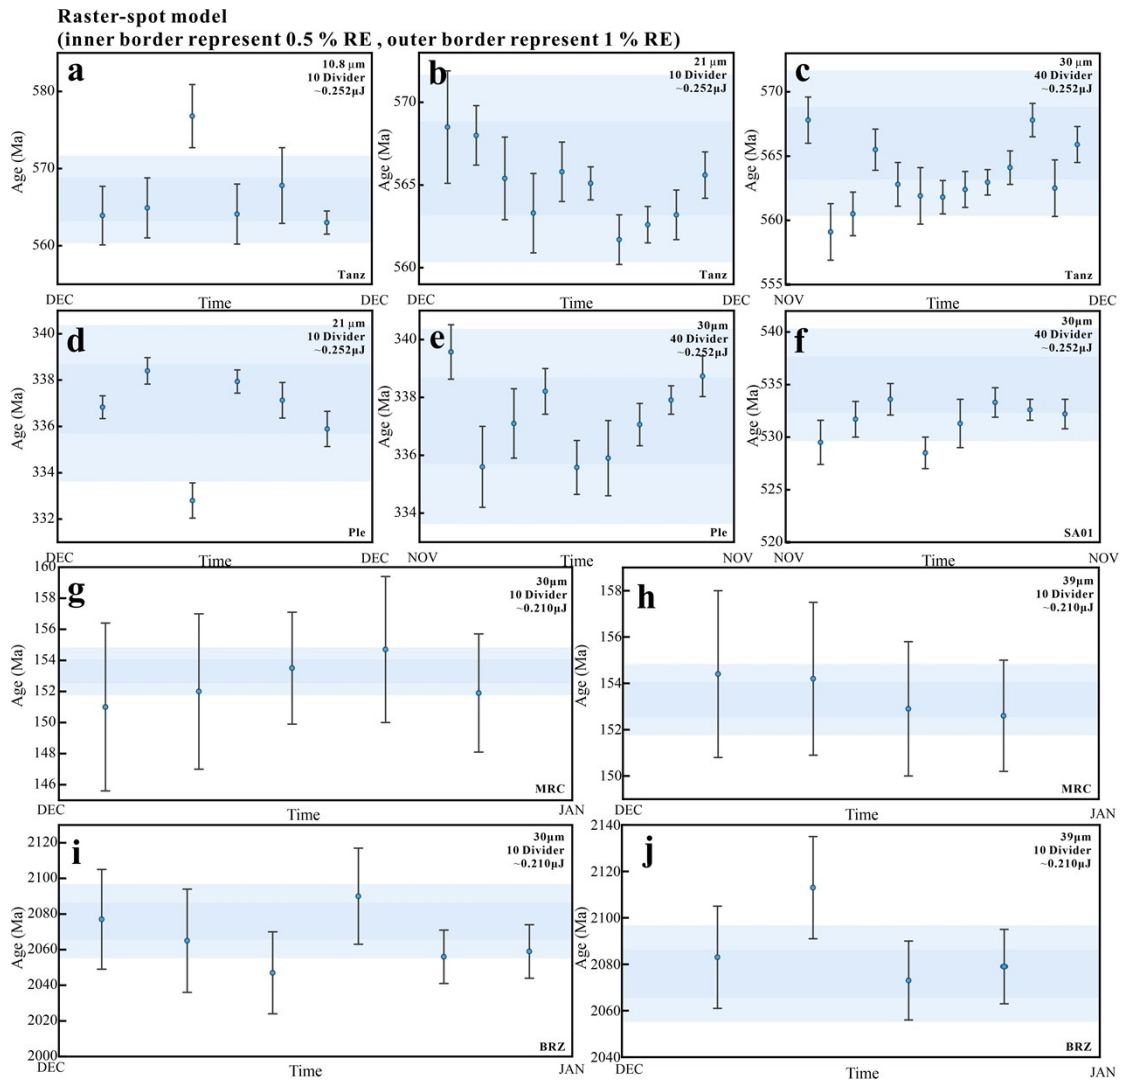

**Frequency-divider model**  
 (inner border represent 1 % RE , outer border represent 2 % RE)

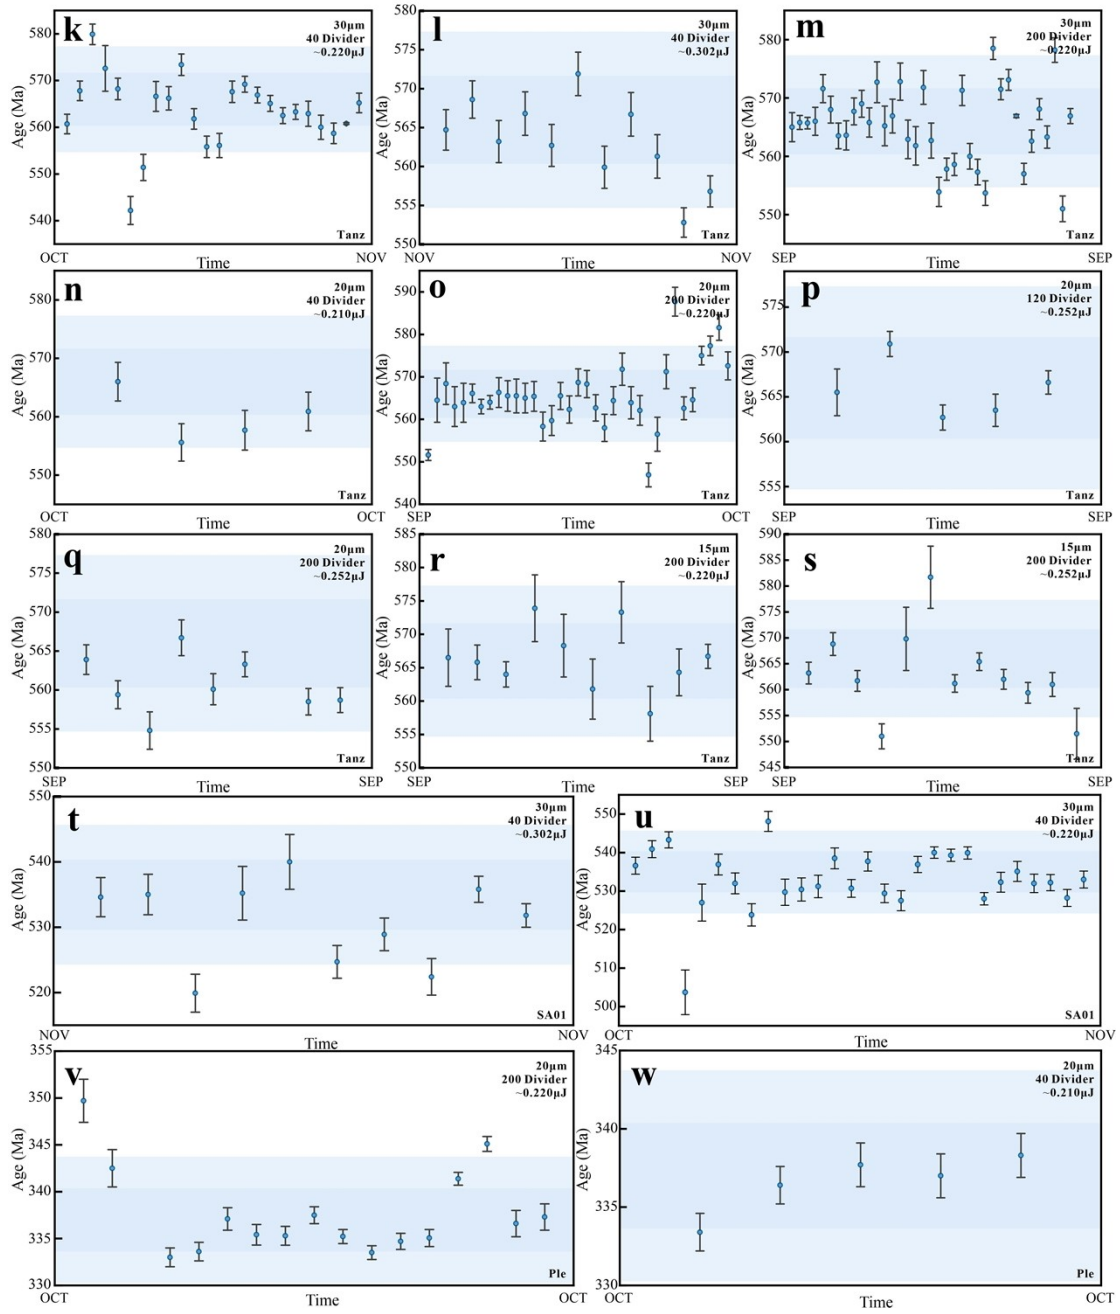

**Figure. S3** Concordia diagrams of U-Pb dating for Zircon (a-f), Apatite (g-i), Allanite (j-k) and monazite (l) obtained using the Raster-spot model

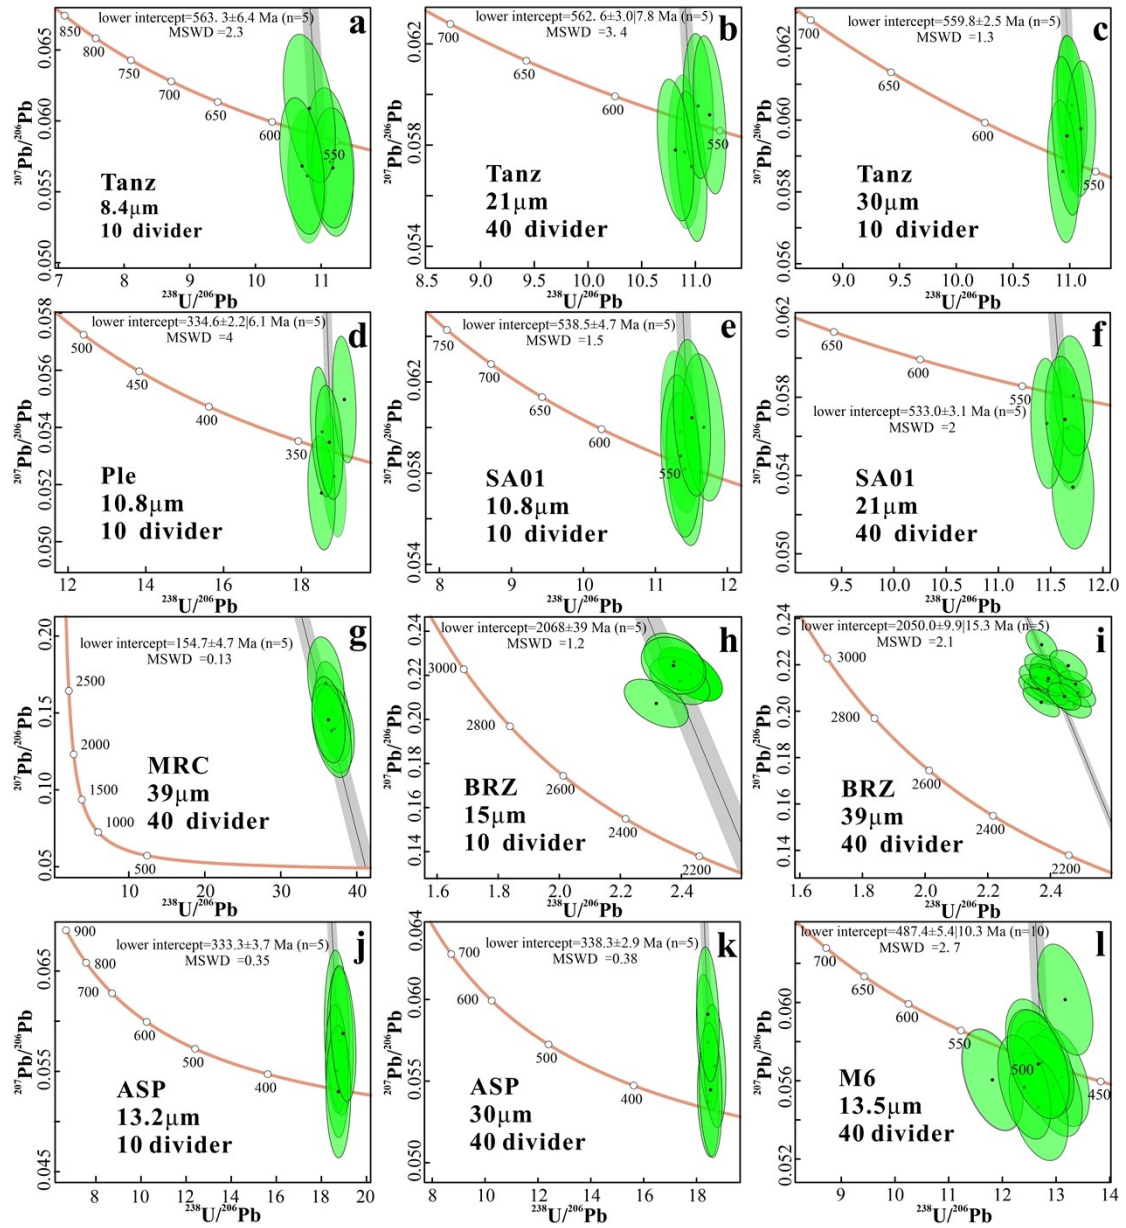

## Reference

- (1) Hu, Z., Zhang, W., Liu, Y., Gao, S., Li, M., Zong, K., ... & Hu, S. (2015). “Wave” signal-smoothing and mercury-removing device for laser ablation quadrupole and multiple collector ICPMS analysis: application to lead isotope analysis. *Analytical Chemistry*, 87(2), 1152-1157.
