# Supplementary material
Source: Royal Society of Chemistry journal article supplement (doi:10.1039/d6ja00088f)
Supplement: d6ja00088f3.xlsx [file d6ja00088f3.xlsx]

## Sheet: NIST SRM 610
Comparison of fractionation indices from the three models
Element	Dense-fill model	Frequency-divider model	Raster-spot model
7Li	0.997533	1.06677	1.02023
9Be	0.921508	1.03943	1.00413
23Na	1.03903	1.0383	0.97384
24Mg	0.94019	1.01614	0.990166
27Al	0.965961	1.07234	1.0332
29Si	1.82303	1.15738	1.04557
43Ca	1	1	1
47Ti	0.979821	1.07998	0.979497
51V	0.972745	1.03501	0.979499
57Fe	1.36312	1.11869	1.08752
59Co	0.972206	1.03962	0.987348
60Ni	0.983206	0.992923	0.959951
63Cu	1.03139	1.02187	0.968866
66Zn	0.545556	1.02482	0.985288
71Ga	1.03257	1.015	0.997732
85Rb	0.987409	1.05596	0.984592
88Sr	0.942826	1.01528	0.988233
90Zr	0.987479	1.03349	0.985308
93Nb	0.974325	1.02033	1.02191
95Mo	0.97825	1.04532	1.00303
121Sb	1.0142	1.00649	0.93204
133Cs	1.02269	1.02808	0.963874
137Ba	0.953966	1.05645	0.974234
139La	0.954183	1.06021	0.988686
140Ce	0.937341	1.04274	0.974001
141Pr	0.956948	1.02284	0.954679
146Nd	0.991382	1.07162	1.0012
147Sm	0.973858	1.04299	1.00103
153Eu	0.964518	1.05737	0.97777
157Gd	0.953176	1.03582	1.00349
159Tb	0.9564	1.04737	0.975575
163Dy	0.998256	1.03753	1.00923
165Ho	0.976226	1.07744	0.959586
166Er	0.975529	1.03052	1.00085
169Tm	0.962827	1.0358	0.999233
172Yb	0.967156	1.02711	0.997764
175Lu	0.973652	1.0358	0.992087
178Hf	0.96539	1.04804	1.01467
182W	1.00047	1.03266	0.978109
208Pb	0.961314	1.06055	0.952641
232Th	0.960655	1.03762	0.999821
238U	0.930286	1.03159	1.00325

## Sheet: BHVO-2G
Comparison of RE and RSD for 42 elements in BHVO-2G glass (two models)
		Frequency-divider model			Raster-spot model
Element	Accepted	Measured	RE	RSD	Measured	RE	RSD
7Li	4.4
9Be	1.3
23Na	17806	15934.3	-10.51	2.57	15715.9	-11.74	4.9
24Mg	42994	41533.6	-3.4	1.98	41396.9	-3.71	2.98
27Al	71971	70145.7	-2.54	2.73	71688	-0.39	3.6
29Si	230428	230428	0	0	230428	0	0
43Ca	81430	78345	-3.79	3.4	79845.9	-1.95	4.87
47Ti	16300	16043	-1.58	2.37	16144.8	-0.95	3.62
51V	308	306.718	-0.42	3.32	305.496	-0.81	4.01
57Fe	87835	89948.3	2.41	2.23	90938.9	3.53	2.48
59Co	44	41.725	-5.17	3.15	42.5289	-3.34	4.56
60Ni	116	110.817	-4.47	4.56	110.313	-4.9	3.95
63Cu	127	112.54	-11.39	3.17	106.003	-16.53	3.54
66Zn	102	89.2394	-12.51	5.47	83.935	-17.71	5.16
71Ga	22	19.7321	-10.31	4.82	19.7347	-10.3	6.05
85Rb	9.2	8.52335	-7.35	6.75	8.65776	-5.89	5.21
88Sr	396	374.698	-5.38	3.07	382.5	-3.41	5.2
90Zr	170	162.817	-4.23	2.4	168.908	-0.64	4.5
93Nb	18.3	16.6253	-9.15	3.89	16.8788	-7.77	4.02
95Mo	3.8	3.88999	2.37	14.16	3.84733	1.25	14.43
121Sb	0.3
133Cs	0.1
137Ba	131	122.784	-6.27	3.44	124.74	-4.78	5.58
139La	15.2	14.5834	-4.06	4.53	15.0747	-0.82	3.11
140Ce	37.6	35.8106	-4.76	3.13	36.0722	-4.06	3.24
141Pr	5.35	4.98175	-6.88	4.02	5.07271	-5.18	4.02
146Nd	24.5	23.4436	-4.31	3.98	23.9839	-2.11	4.56
147Sm	6.1	5.91821	-2.98	10.93	5.97161	-2.1	10.53
153Eu	2.07	1.96401	-5.12	10.6	2.01661	-2.58	7.95
157Gd	6.16	5.93699	-3.62	9.75	6.14787	-0.2	12.87
159Tb	0.92	0.882649	-4.06	8.62	0.907758	-1.33	7.48
163Dy	5.28	5.14475	-2.56	8.73	5.36873	1.68	9.59
165Ho	0.98	0.948344	-3.23	10.28	0.979263	-0.08	10.48
166Er	2.56	2.4197	-5.48	7.65	2.54447	-0.61	9.67
169Tm	0.34	0.317958	-6.48	16.03	0.325266	-4.33	10.67
172Yb	2.01	1.92869	-4.05	12.74	1.95209	-2.88	12.81
175Lu	0.279	0.26401	-5.37	16.52	0.276536	-0.88	18.49
178Hf	4.32	4.37664	1.31	8.72	4.53492	4.97	6.32
182W	0.23	0.191924	-16.55	49.95	0.230788	0.34	42.3
208Pb	1.7	1.54972	-8.84	16.41	1.65308	-2.76	13.22
232Th	1.22	1.18656	-2.74	12.21	1.23935	1.59	7.2
238U	0.403	0.390454	-3.11	23.38	0.406092	0.77	15.08
Slashes (/) indicate that the element concentration is below the method limit of detection (LOD).

## Sheet: OA-1
Comparison of RE and RSD for 42 elements in OA-1 glass (two models)
		Frequency-divider model			Raster-spot model
Element	Accepted	Measured	RE	RSD	Measured	RE	RSD
7Li	43.5	42.342	-2.66	7.71	42.4745	-2.36	10
9Be	3.62	2.98227	-17.62	54.45	2.7427	-24.23	67.72
23Na	30490.5	30390.9	-0.33	2.97	30624.5	0.44	2.14
24Mg	385.947	397.625	3.03	4.97	407.725	5.64	3.88
27Al	68803.4	68388.7	-0.6	2.6	70120.6	1.91	2.47
29Si	356654	356654	0	0	356654	0	0
43Ca	3652.1	3698.63	1.27	8.26	3760.64	2.97	7.86
47Ti	551.401	544.328	-1.28	3.21	554.035	0.48	4
51V	0.857	0.748544	-12.66	30.96	0.744112	-13.17	28.84
57Fe	4368.48	4571.65	4.65	13.5	4644.78	6.32	50.41
59Co	0.121
60Ni	0.328
63Cu	0.893	1.60037	79.21	18.57	1.5157	69.73	22.12
66Zn	34.4	39.6666	15.31	6.82	36.5656	6.3	16.4
71Ga	14.8	14.5796	-1.49	4.78	14.6684	-0.89	5.14
85Rb	120	120.257	0.21	3.82	120.635	0.53	2.76
88Sr	32.8	32.1176	-2.08	2.81	32.6928	-0.33	2.83
90Zr	75.9	74.8706	-1.36	3.83	77.5749	2.21	5.17
93Nb	29.2	28.6436	-1.91	3.09	29.3561	0.53	3.16
95Mo	6.29	6.27201	-0.29	9.69	6.34322	0.85	9.06
121Sb	0.336
133Cs	3.34	3.21267	-3.81	5.32	3.1884	-4.54	4.68
137Ba	364	351.383	-3.47	2.34	358.131	-1.61	3.45
139La	20.5	19.7523	-3.65	3.38	20.1277	-1.82	3.63
140Ce	38.2	38.5664	0.96	3.42	39.1285	2.43	3.2
141Pr	3.99	3.88161	-2.72	4.51	3.93497	-1.38	4.62
146Nd	12.6	12.4646	-1.07	6.43	12.7669	1.32	5.5
147Sm	2.79	2.79954	0.34	14.24	2.93195	5.09	12.17
153Eu	0.337	0.324176	-3.81	21.58	0.337515	0.15	18.73
157Gd	2.78	2.76227	-0.64	14.4	2.73703	-1.55	15.16
159Tb	0.513	0.487944	-4.88	9.51	0.500509	-2.43	14.15
163Dy	3.34	3.27439	-1.96	8.6	3.35843	0.55	8.82
165Ho	0.707	0.669696	-5.28	9.71	0.688084	-2.68	6.9
166Er	2.14	2.13562	-0.2	10.62	2.1455	0.26	9.79
169Tm	0.33	0.320937	-2.75	10.55	0.323417	-1.99	11.72
172Yb	2.32	2.17633	-6.19	11.95	2.30385	-0.7	11.07
175Lu	0.353	0.32163	-8.89	13.29	0.332676	-5.76	16.15
178Hf	3.11	2.94679	-5.25	7.38	3.01523	-3.05	7.19
182W	2.16	2.14582	-0.66	14.3	2.23592	3.51	11.48
208Pb	19.5	19.3011	-1.02	4.65	18.9141	-3	3.48
232Th	15.18	14.3593	-5.41	3.63	14.8263	-2.33	3.63
238U	6.37	6.06911	-4.72	4.39	6.17665	-3.04	5.08
Slashes (/) indicate that the element concentration is below the method limit of detection (LOD).

## Sheet: OH-1
Comparison of RE and RSD for 42 elements in OH-1 glass (two models)
		Frequency-divider model			Raster-spot model
Element	Accepted	Measured	RE	RSD	Measured	RE	RSD
7Li	44.7	45.68	2.19	10.8	43.8401	-1.92	9.68
9Be	4.1	3.36776	-17.86	54.16	3.32363	-18.94	54.72
23Na	29748.7	30239.2	1.65	3.09	30315.3	1.9	3.34
24Mg	120.608	165.718	37.4	11.32	164.642	36.51	4.09
27Al	67215.6	67275.1	0.09	2.66	68371.5	1.72	2.92
29Si	355719	355719	0	0	355719	0	0
43Ca	3895.09	3877.28	-0.46	8.39	3832.55	-1.61	7.04
47Ti	377.59	379.405	0.48	8.16	376.622	-0.26	3.99
51V	0.363
57Fe	7928.55	9794.8	23.54	87	8602.76	8.5	14.94
59Co	0.135
60Ni	0.292
63Cu	2.39	3.04421	27.37	124.35	2.39814	0.34	72.58
66Zn	42.3	50.4378	19.24	26.16	45.4675	7.49	7.15
71Ga	17.1	17.5353	2.55	5.57	17.3341	1.37	5.32
85Rb	185	181.247	-2.03	3.18	182.982	-1.09	2.56
88Sr	6.32	6.13179	-2.98	4.45	6.13296	-2.96	4.7
90Zr	104	103.708	-0.28	4.36	104.565	0.54	3.47
93Nb	20.9	21.2799	1.82	4.05	21.3445	2.13	3.26
95Mo	2.63	2.74714	4.45	12.75	2.68913	2.25	13.41
121Sb	0.857	0.826411	-3.57	24.1	0.850189	-0.79	22.93
133Cs	5.45	5.44161	-0.15	5.92	5.45667	0.12	4.32
137Ba	23.9	24.1926	1.22	6.51	24.0873	0.78	5.62
139La	23.2	23.2149	0.06	3.45	23.5019	1.3	2.92
140Ce	48	50.2543	4.7	3.45	50.5906	5.4	3.66
141Pr	5.65	5.68907	0.69	4.64	5.68376	0.6	4.21
146Nd	20.8	20.4902	-1.49	4.74	20.8309	0.15	5.04
147Sm	4.44	4.48141	0.93	8.32	4.59952	3.59	9.45
153Eu	0.139	0.136416	-1.86	31.75	0.140939	1.39	33.18
157Gd	3.94	3.86558	-1.89	11.74	4.03216	2.34	9.07
159Tb	0.651	0.638589	-1.91	11.43	0.639669	-1.74	10.71
163Dy	3.97	4.08613	2.93	8	4.16179	4.83	6.67
165Ho	0.84	0.824266	-1.87	8.96	0.824186	-1.88	8.1
166Er	2.49	2.51307	0.93	8.98	2.54903	2.37	9.89
169Tm	0.377	0.380569	0.95	13.49	0.376083	-0.24	13.08
172Yb	2.67	2.66713	-0.11	13	2.71229	1.58	8.65
175Lu	0.393	0.402134	2.32	11.45	0.399513	1.66	12.46
178Hf	4.44	4.29744	-3.21	7.34	4.29676	-3.23	7.47
182W	1.96	1.98156	1.1	14.4	1.94433	-0.8	11.74
208Pb	27.4	27.1844	-0.79	4.56	26.4935	-3.31	6.04
232Th	19.5	19.4588	-0.21	4.22	20.0605	2.87	3.62
238U	6.35	6.26474	-1.34	5.16	6.32965	-0.32	5.14
Slashes (/) indicate that the element concentration is below the method limit of detection (LOD).

## Sheet: OJY-1
Comparison of RE and RSD for 42 elements in OJY-1 glass (two models)
		Frequency-divider model			Raster-spot model
Element	Accepted	Measured	RE	RSD	Measured	RE	RSD
7Li	38.5	38.5013	0	8.46	37.8166	-1.78	14.48
9Be	1.9	1.23379	-35.06	101.83	0.900899	-52.58	239.83
23Na	10831.2	10923	0.85	2.74	10947.5	1.07	1.81
24Mg	38474.1	38071.3	-1.05	3.74	38787.9	0.82	2.02
27Al	60335.3	60115.8	-0.36	3.24	62551.7	3.67	2.3
29Si	276255	276255	0	0	276255	0	0
43Ca	85048.8	84899.1	-0.18	4.23	87649.2	3.06	2.82
47Ti	3715.96	3730.88	0.4	3.15	3840.99	3.36	2.42
51V	84.5	85.4548	1.13	3.34	85.4599	1.14	3.21
57Fe	41741.5	45432.4	8.84	3.08	45843.3	9.83	2.75
59Co	13.4	13.2919	-0.81	4.29	12.9904	-3.06	5.03
60Ni	33.4	32.6574	-2.22	5.47	31.3655	-6.09	7.94
63Cu	149	145.521	-2.33	3.57	144.493	-3.02	2.42
66Zn	242	236.189	-2.4	5.71	204.822	-15.36	9.02
71Ga	15.2	14.5416	-4.33	4.05	14.2002	-6.58	6.31
85Rb	95.9	99.3027	3.55	4	98.2821	2.48	3.04
88Sr	265	275.5	3.96	3.57	285.289	7.66	2.13
90Zr	164	167.216	1.96	3.22	178.21	8.66	2.71
93Nb	11.3	11.6585	3.17	4.37	11.7754	4.21	3.05
95Mo	1.29	1.34326	4.13	15.42	1.23969	-3.9	32.37
121Sb	0.936	0.895458	-4.33	16.31	0.876379	-6.37	27.61
133Cs	4.85	4.77419	-1.56	5.14	4.70305	-3.03	6.52
137Ba	832	840.381	1.01	3.61	852.585	2.47	4.02
139La	28.7	29.1376	1.52	2.7	30.0737	4.79	2.81
140Ce	59.9	60.8953	1.66	3.33	61.3301	2.39	3.92
141Pr	6.92	7.02119	1.46	4.6	7.13483	3.1	4.64
146Nd	26.5	26.4438	-0.21	4.95	27.8313	5.02	5.22
147Sm	5.28	5.41156	2.49	10.19	5.4539	3.29	11.38
153Eu	1.07	1.08686	1.58	7.02	1.13792	6.35	11.27
157Gd	4.75	4.69551	-1.15	8.64	4.96895	4.61	11.25
159Tb	0.72	0.734781	2.05	10.18	0.772806	7.33	11.64
163Dy	4.61	4.6407	0.67	8	4.90226	6.34	10.5
165Ho	0.945	0.949027	0.43	8.25	1.00309	6.15	10.25
166Er	2.77	2.8419	2.6	7.09	3.04549	9.95	10.7
169Tm	0.407	0.411333	1.06	12.58	0.432303	6.22	13.88
172Yb	2.75	2.77398	0.87	6.98	3.00688	9.34	13.91
175Lu	0.412	0.421009	2.19	11.93	0.455193	10.48	16.16
178Hf	4.59	4.61972	0.65	6.38	4.95994	8.06	6.55
182W	1.91	1.95916	2.57	13.26	1.9445	1.81	13.61
208Pb	39.1	37.7177	-3.54	3.54	35.4946	-9.22	3.87
232Th	9.31	9.37817	0.73	3.92	9.89989	6.34	4.4
238U	2.53	2.62749	3.85	4.58	2.63371	4.1	6.65
Slashes (/) indicate that the element concentration is below the method limit of detection (LOD).

## Sheet: NKT-1G
Comparison of RE and RSD for 42 elements in NKT-1G glass (two models)
		Frequency-divider model			Raster-spot model
Element	Accepted	Measured	RE	RSD	Measured	RE	RSD
7Li	16.3	16.4483	0.91	18.55	16.2033	-0.59	22.65
9Be	2.43	1.98311	-18.39	66.59	1.92134	-20.93	77.69
23Na	25149.1	25209.8	0.24	1.48	25163.7	0.06	2.33
24Mg	85571.6	83686.3	-2.2	2.3	82972.9	-3.04	1.8
27Al	53190.3	54158	1.82	1.58	54287.9	2.06	1.78
29Si	176598	176598	0	0	176598	0	0
43Ca	92839	93578.6	0.8	1.65	91837.1	-1.08	2.66
47Ti	23015	23268.8	1.1	1.85	23163.6	0.65	1.99
51V	292	291.963	-0.01	1.63	286.593	-1.85	2.21
57Fe	103304	99901.4	-3.29	1.81	99299	-3.88	1.84
59Co	63.7	63.6112	-0.14	3.3	62.7643	-1.47	2.56
60Ni	315	300.57	-4.58	2.24	303.899	-3.52	4
63Cu	56.5	49.2108	-12.9	3.99	48.9691	-13.33	3.24
66Zn	117.4	122.584	4.42	4.81	120.521	2.66	3.04
71Ga	20.2	20.4398	1.19	2.66	19.7891	-2.03	4.02
85Rb	31.4	29.8793	-4.84	2.82	29.8031	-5.09	3.42
88Sr	1175	1213.23	3.25	2.15	1192.73	1.51	3.08
90Zr	292	295.133	1.07	2.09	291.931	-0.02	2.81
93Nb	85.2	87.5303	2.74	2.13	85.8272	0.74	2.31
95Mo
121Sb	0.19
133Cs	0.532	0.501493	-5.73	12.85	0.503986	-5.27	10.8
137Ba	741	739.403	-0.22	2.25	736.867	-0.56	2.04
139La	62.6	63.7037	1.76	2.63	62.7234	0.2	1.97
140Ce	124.3	126.465	1.74	2.22	124.3	0	2.27
141Pr	15.2	15.0327	-1.1	2.61	14.9085	-1.92	2.72
146Nd	60.5	61.679	1.95	2.34	61.0595	0.92	2.73
147Sm	12.3	12.3246	0.2	5.28	12.3242	0.2	5.19
153Eu	3.84	3.84996	0.26	5.02	3.76769	-1.88	5.57
157Gd	10.6	10.5074	-0.87	4.92	10.4754	-1.18	4.62
159Tb	1.4	1.33469	-4.66	7.14	1.3448	-3.94	6.34
163Dy	7	7.16292	2.33	5.15	6.91333	-1.24	4.5
165Ho	1.15	1.14993	-0.01	7.22	1.15361	0.31	6.67
166Er	2.72	2.78683	2.46	5.89	2.71746	-0.09	5.64
169Tm	0.33	0.312262	-5.38	14.68	0.320656	-2.83	11.37
172Yb	1.8	1.76903	-1.72	13.47	1.75192	-2.67	10.82
175Lu	0.235	0.236818	0.77	14.51	0.229939	-2.15	16.94
178Hf	6.74	6.9145	2.59	6.33	6.9247	2.74	4.2
182W	0.37	0.285002	-22.97	37.95	0.271642	-26.58	28.12
208Pb	3.34333	3.01958	-9.68	7.37	3.04539	-8.91	7.54
232Th	7.4	7.51828	1.6	4.16	7.43885	0.53	4.33
238U	2.2	2.17146	-1.3	6.94	2.1525	-2.16	6.42
Slashes (/) indicate that the element concentration is below the method limit of detection (LOD).
Molybdenum (Mo) is not present in the NKT-1G reference material, hence no data is provided.
